# Supplementary material for: Sensory transduction is required for normal development and maturation of cochlear inner hair cell synapses
Source: eLife journal article supplement (doi:10.7554/elife.69433), 2021-11-04
Supplement: supp [file elife-69433-supp-v1.zip]

Archive with 12 entries (12 files):
- elife_poa_e69433_Transparent_Reporting_File.pdf
- elife_poa_e69433_Figure_1_source_data_1.xlsx
- elife_poa_e69433_Figure_3_source_data_1.xlsx
- elife_poa_e69433_Figure_4_source_data_1.xlsx
- elife_poa_e69433_Figure_5_source_data_1.xlsx
- elife_poa_e69433_Figure_6_source_data_1.xlsx
- elife_poa_e69433_Supplementary_file_1.xlsx
- elife_poa_e69433_Supplementary_file_2.xlsx
- elife_poa_e69433_Supplementary_file_3.xlsx
- elife_poa_e69433_Supplementary_file_4.xlsx
- elife_poa_e69433_Supplementary_file_5.xlsx
- elife_poa_e69433_Supplementary_file_6.xlsx
