# Supplementary material for: Sensory transduction is required for normal development and maturation of cochlear inner hair cell synapses
Source: eLife journal article supplement (doi:10.7554/elife.69433), 2021-11-04
Supplement: supp [file elife-69433-supp-v1.zip › elife_poa_e69433_Figure_1_source_data_1.xlsx]

## Sheet: Fig. 1C P2 WT vs. Tmc dKO
	Ribbon Counts P2
	8.0kHz
		Ribbons	IHCs	Ribbon:IHC Ratio	Ribbons	Synapse:IHC Ratio
	Control
	1081820-P2L1C	284	8	35.5	284	35.5
	1081821-P2L1C	324	8	40.5	320	40
	1081821-P2L3C	287	8	35.875	287	35.875
	1081821-P2R2C	285	8	35.625	284	35.5
	1081821-P2R4C	354	8	44.25	354	44.25
	Total Average	306.8	8	38.35	305.8	38.225
	Total StDev	31.2682	0	3.90852	30.9386	3.86733
	Total StErr	13.9836	0	1.74795	13.8362	1.72952
	Total n	5	5	5	5	5
	Tmc-/-
	1131715-P2L1C	280	8	35	280	35
	1131715-P2R1C	274	8	34.25	274	34.25
	1087603-P2L1C	277	9	30.7778	277	30.7778
	1087603-P2L3C	308	8	38.5	308	38.5
	1087603-P2R2C	428	9	47.5556	423	47
	1087603-P2R4C	258	8	32.25	258	32.25
	Total Average	304.167	8.33333	36.3889	303.333	36.2963
	Total StDev	62.7899	0.516398	6.07075	60.82	5.86719
	Total StErr	25.6339	0.210819	2.47837	24.8296	2.39527
	Total n	6	6	6	6	6
	Ribbon Counts P2
	11.3kHz
		Ribbons	IHCs	Ribbon:IHC Ratio	Ribbons	Synapse:IHC Ratio
	Control
	1081820-P2L1C	305	8	38.125	302	37.75
	1081821-P2L1C	306	8	38.25	305	38.125
	1081821-P2L3C	374	8	46.75	374	46.75
	1081821-P2R2C	284	8	35.5	283	35.375
	1081821-P2R4C	314	8	39.25	314	39.25
	Total Average	316.6	8	39.575	315.6	39.45
	Total StDev	33.9529	0	4.24411	34.5442	4.31802
	Total StErr	15.1842	0	1.89803	15.4486	1.93108
	Total n	5	5	5	5	5
	Tmc-/-
	1131715-P2L1C	313	8	39.125	313	39.125
	1131715-P2R1C	432	8	54	432	54
	1087603-P2L1C	314	9	34.8889	314	34.8889
	1087603-P2L3C	352	9	39.1111	349	38.7778
	1087603-P2R2C	286	7	40.8571	284	40.5714
	1087603-P2R4C	347	8	43.375	347	43.375
	Total Average	340.667	8.16667	41.8929	339.833	41.7897
	Total StDev	50.9418	0.752773	6.54686	51.2539	6.58608
	Total StErr	20.7969	0.307318	2.67275	20.9243	2.68876
	Total n	6	6	6	6	6
	Ribbon Counts P2
	16.0kHz
		Ribbons	IHCs	Ribbon:IHC Ratio	Ribbons	Synapse:IHC Ratio
	Control
	1081820-P2L1C	359	8	44.875	359	44.875
	1081821-P2L1C	424	8	53	424	53
	1081821-P2L3C	385	8	48.125	385	48.125
	1081821-P2R2C	375	8	46.875	375	46.875
	1081821-P2R4C	384	8	48	384	48
	Total Average	385.4	8	48.175	385.4	48.175
	Total StDev	23.9646	0	2.99557	23.9646	2.99557
	Total StErr	10.7173	0	1.33966	10.7173	1.33966
	Total n	5	5	5	5	5
	Tmc-/-
	1131715-P2L1C	468	8	58.5	468	58.5
	1131715-P2R1C	493	8	61.625	484	60.5
	1087603-P2L1C	359	8	44.875	357	44.625
	1087603-P2L3C	424	9	47.1111	424	47.1111
	1087603-P2R2C
	1087603-P2R4C	373	8	46.625	373	46.625
	Total Average	423.4	8.2	51.7472	421.2	51.4722
	Total StDev	58.1403	0.447214	7.71571	56.0955	7.42108
	Total StErr	26.0012	0.2	3.45057	25.0866	3.31881
	Total n	5	5	5	5	5
	Ribbon Counts P2
	22.6kHz
		Ribbons	IHCs	Ribbon:IHC Ratio	Ribbons	Synapse:IHC Ratio
	Control
	1081820-P2L1C	407	8	50.875	407	50.875
	1081821-P2L1C	390	8	48.75	390	48.75
	1081821-P2L3C	388	8	48.5	388	48.5
	1081821-P2R2C	363	8	45.375	363	45.375
	1081821-P2R4C	373	8	46.625	372	46.5
	Total Average	384.2	8	48.025	384	48
	Total StDev	16.9027	0	2.11283	17.0734	2.13417
	Total StErr	7.5591	0	0.944888	7.63544	0.95443
	Total n	5	5	5	5	5
	Tmc-/-
	1131715-P2L1C	523	8	65.375	523	65.375
	1131715-P2R1C	525	8	65.625	525	65.625
	1087603-P2L1C	363	8	45.375	362	45.25
	1087603-P2L3C	466	8	58.25	466	58.25
	1087603-P2R2C	362	8	45.25	362	45.25
	1087603-P2R4C	413	9	45.8889	412	45.7778
	Total Average	442	8.16667	54.294	441.667	54.2546
	Total StDev	74.1728	0.408248	9.98818	74.4652	10.0293
	Total StErr	30.2809	0.166667	4.07766	30.4003	4.09445
	Total n	6	6	6	6	6
	Ribbon Counts P2
	32.0kHz
		Ribbons	IHCs	Ribbon:IHC Ratio	Ribbons	Synapse:IHC Ratio
	Control
	1081820-P2L1C	416	8	52	415	51.875
	1081821-P2L1C	408	8	51	408	51
	1081821-P2L3C	379	8	47.375	379	47.375
	1081821-P2R2C	359	8	44.875	359	44.875
	1081821-P2R4C	405	8	50.625	405	50.625
	Total Average	393.4	8	49.175	393.2	49.15
	Total StDev	23.7129	0	2.96411	23.4776	2.93471
	Total StErr	10.6047	0	1.32559	10.4995	1.31244
	Total n	5	5	5	5	5
	Tmc-/-
	1131715-P2L1C	492	8	61.5	492	61.5
	1131715-P2R1C	537	8	67.125	537	67.125
	1087603-P2L1C	397	8	49.625	397	49.625
	1087603-P2L3C	451	8	56.375	450	56.25
	1087603-P2R2C	385	8	48.125	385	48.125
	1087603-P2R4C	393	8	49.125	393	49.125
	Total Average	442.5	8	55.3125	442.333	55.2917
	Total StDev	62.0959	0	7.76199	62.0699	7.75873
	Total StErr	25.3505	0	3.16882	25.3399	3.16749
	Total n	6	6	6	6	6
