# Supplementary material for: Sensory transduction is required for normal development and maturation of cochlear inner hair cell synapses
Source: eLife journal article supplement (doi:10.7554/elife.69433), 2021-11-04
Supplement: supp [file elife-69433-supp-v1.zip › elife_poa_e69433_Figure_3_source_data_1.xlsx]

## Sheet: Fig. 3A-C WT vs. Tmc dKO
	Synapse Counts P7								Synapse Counts P14								Synapse Counts P28
	8.0kHz								8.0kHz								8.0kHz
		Ribbons	IHCs	Ribbon:IHC Ratio	Ribbons w/ Terminals	Ribbons w/o Terminals	Synapse:IHC Ratio			Ribbons	IHCs	Ribbon:IHC Ratio	Ribbons w/ Terminals	Ribbons w/o Terminals	Synapse:IHC Ratio			Ribbons	IHCs	Ribbon:IHC Ratio	Ribbons w/ Terminals	Ribbons w/o Terminals	Synapse:IHC Ratio
	Control								Control								Control
	1081821-P7L1C	312	8	39	312	0	39		1081820-P14R1C	115	8	14.375	114	1	14.25		1249686-P28L1C	152	10	15.2	152	0	15.2
	1081821-P7L2C	282	8	35.25	282	0	35.25		1081820-P14R2C	132	9	14.6667	132	0	14.6667		1249686-P28L2C	141	9	15.6667	141	0	15.6667
	1081821-P7L4C	309	8	38.625	309	0	38.625		1081821-P14L1C	127	8	15.875	127	0	15.875		1249686-P28L3C	150	9	16.6667	150	0	16.6667
	1081821-P7R3C	303	8	37.875	303	0	37.875		1081821-P14L2C	152	8	19	151	1	18.875		1249686-P28L4C	140	9	15.5556	140	0	15.5556
									1081821-P14L3C	139	9	15.4444	139	0	15.4444
									1221818-P14L1C	130	8	16.25	130	0	16.25
									1221818-P14L2C	128	8	16	128	0	16
									1221818-P14L3C	124	8	15.5	124	0	15.5
									1221818-P14L4C	159	9	17.6667	159	0	17.6667
	Total Average	301.5	8	37.6875	301.5	0	37.6875		Total Average	134	8.33333	16.0864	133.778	0.222222	16.0586		Total Average	145.75	9.25	15.7722	145.75	0	15.7722
	Total StDev	13.5277	0	1.69097	13.5277	0	1.69097		Total StDev	13.8744	0.5	1.44766	13.8904	0.440959	1.43568		Total StDev	6.13052	0.5	0.628638	6.13052	0	0.628638
	Total StErr	6.76387	0	0.845484	6.76387	0	0.845484		Total StErr	4.62481	0.166667	0.482553	4.63015	0.146986	0.478561		Total StErr	3.06526	0.25	0.314319	3.06526	0	0.314319
	Total n	4	4	4	4	4	4		Total n	9	9	9	9	9	9		Total n	4	4	4	4	4	4
	Tmc-/-								Tmc-/-								Tmc-/-
	1087045-P7R1C	412	7	58.8571	412	0	58.8571		1131715-P14L1C	157	9	17.4444	155	2	17.2222		1087603-P28L1C	107	9	11.8889	11	96	10.6667
	1087045-P7R2C	411	7	58.7143	410	1	58.5714		1131715-P14L2C	164	8	20.5	163	1	20.375		1087603-P28L2C	95	10	9.5	9	86	8.6
	1087045-P7R3C	375	7	53.5714	375	0	53.5714		1131715-P14L1C	159	9	17.6667	159	0	17.6667		1087603-P28L3C	149	11	13.5455	11	138	12.5455
	1087045-P7L1C	389	7	55.5714	389	0	55.5714		1131715-P14L2C	178	10	17.8	177	1	17.7		1249700-P28L1C	112	9	12.4444	1	111	12.3333
	1087045-P7L2C	329	7	47	329	0	47		1131715-P14L3C	151	9	16.7778	150	1	16.6667		1249700-P28L2C	126	10	12.6	2	124	12.4
	1131715-P7L1C	449	7	64.1429	449	0	64.1429		1131715-P14L4C	170	9	18.8889	168	2	18.6667
	1131715-P7L2C	414	7	59.1429	414	0	59.1429
	1087603-P7L1C	506	9	56.2222	506	0	56.2222
	1087603-P7L2C	420	8	52.5	420	0	52.5
	1087603-P7L3C	414	8	51.75	414	0	51.75
	1087603-P7L4C	429	8	53.625	429	0	53.625
	1087603-P7R3C	434	9	48.2222	434	0	48.2222
	Total Average	415.167	7.58333	54.9433	415.083	0.0833333	54.9314		Total Average	163.167	9	18.1796	162	1.16667	18.0495		Total Average	117.8	9.8	11.9958	6.8	111	11.3091
	Total StDev	42.3381	0.792961	4.87939	42.348	0.288675	4.86951		Total StDev	9.70395	0.632456	1.32666	9.63328	0.752773	1.31561		Total StDev	20.6809	0.83666	1.51725	4.91935	20.9045	1.69703
	Total StErr	12.222	0.228908	1.40856	12.2248	0.0833333	1.40571		Total StErr	3.96162	0.258199	0.541606	3.93277	0.307318	0.537096		Total StErr	9.24878	0.374166	0.678536	2.2	9.3488	0.758935
	Total n	12	12	12	12	12	12		Total n	6	6	6	6	6	6		Total n	5	5	5	5	5	5
	Synapse Counts P7								Synapse Counts P14								Synapse Counts P28
	11.3kHz								11.3kHz								11.3kHz
		Ribbons	IHCs	Ribbon:IHC Ratio	Ribbons w/ Terminals	Ribbons w/o Terminals	Synapse:IHC Ratio			Ribbons	IHCs	Ribbon:IHC Ratio	Ribbons w/ Terminals	Ribbons w/o Terminals	Synapse:IHC Ratio			Ribbons	IHCs	Ribbon:IHC Ratio	Ribbons w/ Terminals	Ribbons w/o Terminals	Synapse:IHC Ratio
	Control								Control								Control
	1081821-P7L1C	277	8	34.625	276	1	34.5		1081820-P14R1C	176	9	19.5556	176	0	19.5556		1249686-P28L1C	152	10	15.2	152	0	15.2
	1081821-P7L2C	311	8	38.875	310	1	38.75		1081820-P14R2C	136	8	17	136	0	17		1249686-P28L2C	149	9	16.5556	148	1	16.4444
	1081821-P7L4C	411	10	41.1	409	2	40.9		1081821-P14L1C	137	8	17.125	137	0	17.125		1249686-P28L3C	168	9	18.6667	168	0	18.6667
	1081821-P7R3C	304	8	38	303	1	37.875		1081821-P14L2C	136	8	17	135	1	16.875		1249686-P28L4C	164	10	16.4	164		16.4
									1081821-P14L3C	126	8	15.75	126	0	15.75
									1221818-P14L1C	152	9	16.8889	152	0	16.8889
									1221818-P14L2C	131	8	16.375	131	0	16.375
									1221818-P14L3C	149	8	18.625	149	0	18.625
									1221818-P14L4C	152	9	16.8889	152	0	16.8889
	Total Average	325.75	8.5	38.15	324.5	1.25	38.0063		Total Average	143.889	8.33333	17.2454	143.778	0.111111	17.2315		Total Average	158.25	9.5	16.7056	158	0.333333	16.6778
	Total StDev	58.6934	1	2.68801	58.2094	0.5	2.6607		Total StDev	15.1941	0.5	1.15234	15.2625	0.333333	1.15641		Total StDev	9.17878	0.57735	1.44089	9.5219	0.57735	1.44581
	Total StErr	29.3467	0.5	1.34401	29.1047	0.25	1.33035		Total StErr	5.0647	0.166667	0.384113	5.08751	0.111111	0.385471		Total StErr	4.58939	0.288675	0.720447	4.76095	0.333333	0.722906
	Total n	4	4	4	4	4	4		Total n	9	9	9	9	9	9		Total n	4	4	4	4	3	4
	Tmc-/-								Tmc-/-								Tmc-/-
	1087045-P7R1C	393	7	56.1429	393	0	56.1429		1131715-P14L1C	138	8	17.25	136	2	17		1087603-P28L1C	127	9	14.1111	20	107	11.8889
	1087045-P7R2C	386	7	55.1429	386	0	55.1429		1131715-P14L2C	129	7	18.4286	129	0	18.4286		1087603-P28L2C	145	12	12.0833	7	138	11.5
	1087045-P7R3C	392	6	65.3333	391	1	65.1667		1131715-P14L1C	173	9	19.2222	171	2	19		1087603-P28L3C	129	10	12.9	5	124	12.4
	1087045-P7L1C	381	7	54.4286	381	0	54.4286		1131715-P14L2C	148	9	16.4444	148	0	16.4444		1249700-P28L1C	111	9	12.3333	2	109	12.1111
	1087045-P7L2C	315	7	45	315	0	45		1131715-P14L3C	169	10	16.9	169	0	16.9		1249700-P28L2C	135	9	15	1	134	14.8889
	1131715-P7L1C	553	9	61.4444	553	0	61.4444		1131715-P14L4C	144	9	16	141	3	15.6667
	1131715-P7L2C	422	7	60.2857	421	1	60.1429
	1087603-P7L1C	427	8	53.375	427	0	53.375
	1087603-P7L2C	430	8	53.75	430	0	53.75
	1087603-P7L3C	476	9	52.8889	476	0	52.8889
	1087603-P7L4C	414	8	51.75	413	1	51.625
	1087603-P7R3C	438	8	54.75	438	0	54.75
	Total Average	418.917	7.58333	55.3576	418.667	0.25	55.3214		Total Average	150.167	8.66667	17.3742	149	1.16667	17.2399		Total Average	129.4	9.8	13.2856	7	122.4	12.5578
	Total StDev	57.6344	0.900337	5.18433	57.6815	0.452267	5.15106		Total StDev	17.4059	1.0328	1.22638	17.4241	1.32916	1.24834		Total StDev	12.4419	1.30384	1.23709	7.64853	14.1174	1.34395
	Total StErr	16.6376	0.259905	1.49659	16.6512	0.130558	1.48698		Total StErr	7.10594	0.421637	0.500668	7.11337	0.542627	0.509633		Total StErr	5.56417	0.583095	0.553244	3.42053	6.31348	0.601032
	Total n	12	12	12	12	12	12		Total n	6	6	6	6	6	6		Total n	5	5	5	5	5	5
	Synapse Counts P7								Synapse Counts P14								Synapse Counts P28
	16.0kHz								16.0kHz								16.0kHz
		Ribbons	IHCs	Ribbon:IHC Ratio	Ribbons w/ Terminals	Ribbons w/o Terminals	Synapse:IHC Ratio			Ribbons	IHCs	Ribbon:IHC Ratio	Ribbons w/ Terminals	Ribbons w/o Terminals	Synapse:IHC Ratio			Ribbons	IHCs	Ribbon:IHC Ratio	Ribbons w/ Terminals	Ribbons w/o Terminals	Synapse:IHC Ratio
	Control								Control								Control
	1081821-P7L1C	334	8	41.75	332	2	41.5		1081820-P14R1C	145	8	18.125	145	0	18.125		1249686-P28L1C	192	10	19.2	192	0	19.2
	1081821-P7L2C	318	8	39.75	318	0	39.75		1081820-P14R2C	153	8	19.125	153	0	19.125		1249686-P28L2C	169	9	18.7778	169	0	18.7778
	1081821-P7L4C	362	9	40.2222	361	1	40.1111		1081821-P14L1C	147	8	18.375	147	0	18.375		1249686-P28L3C	194	10	19.4	194	0	19.4
	1081821-P7R3C	314	8	39.25	312	2	39		1081821-P14L2C	147	8	18.375	147	0	18.375		1249686-P28L4C	170	10	17	170	0	17
									1081821-P14L3C	113	8	14.125	113	0	14.125
									1221818-P14L1C	131	8	16.375	131	0	16.375
									1221818-P14L2C	133	8	16.625	133	0	16.625
									1221818-P14L3C	128	8	16	128	0	16
									1221818-P14L4C	155	8	19.375	155	0	19.375
	Total Average	332	8.25	40.2431	330.75	1.25	40.0903		Total Average	139.111	8	17.3889	139.111	0	17.3889		Total Average	181.25	9.75	18.5944	181.25	0	18.5944
	Total StDev	21.7868	0.5	1.08021	21.8384	0.957427	1.04758		Total StDev	13.7518	0	1.71897	13.7518	0	1.71897		Total StDev	13.5984	0.5	1.09415	13.5984	0	1.09415
	Total StErr	10.8934	0.25	0.540106	10.9192	0.478714	0.523788		Total StErr	4.58392	0	0.57299	4.58392	0	0.57299		Total StErr	6.7992	0.25	0.547074	6.7992	0	0.547074
	Total n	4	4	4	4	4	4		Total n	9	9	9	9	9	9		Total n	4	4	4	4	4	4
	Tmc-/-								Tmc-/-								Tmc-/-
	1087045-P7R1C	406	7	58	405	1	57.8571		1131715-P14L1C	168	9	18.6667	163	5	18.1111		1087603-P28L1C	128	9	14.2222	18	110	12.2222
	1087045-P7R2C	460	8	57.5	460	0	57.5		1131715-P14L2C	179	8	22.375	179	0	22.375		1087603-P28L2C	99	9	11	4	95	10.5556
	1087045-P7R3C	548	9	60.8889	548	0	60.8889		1131715-P14L1C	168	9	18.6667	165	3	18.3333		1087603-P28L3C	148	10	14.8	9	139	13.9
	1087045-P7L1C	356	7	50.8571	354	2	50.5714		1131715-P14L2C	161	10	16.1	161	0	16.1		1249700-P28L1C	106	9	11.7778	0	106	11.7778
	1087045-P7L2C	302	7	43.1429	301	1	43		1131715-P14L3C	174	10	17.4	171	3	17.1		1249700-P28L2C	104	9	11.5556	1	103	11.4444
	1131715-P7L1C	434	7	62	434	0	62		1131715-P14L4C	136	9	15.1111	136	0	15.1111
	1131715-P7L2C	422	7	60.2857	422	0	60.2857
	1087603-P7L1C	487	9	54.1111	487	0	54.1111
	1087603-P7L2C
	1087603-P7L3C	473	9	52.5556	469	4	52.1111
	1087603-P7L4C	423	8	52.875	422	1	52.75
	1087603-P7R3C	451	8	56.375	451	0	56.375
	Total Average	432.909	7.81818	55.3265	432.091	0.818182	55.2228		Total Average	164.333	9.16667	18.0532	162.5	1.83333	17.8551		Total Average	117	9.2	12.6711	6.4	110.6	11.98
	Total StDev	65.4484	0.873863	5.4463	65.7061	1.25045	5.52437		Total StDev	15.1614	0.752773	2.54276	14.5293	2.13698	2.52602		Total StDev	20.5913	0.447214	1.71561	7.36885	16.8018	1.23509
	Total StErr	19.7334	0.26348	1.64212	19.8111	0.377026	1.66566		Total StErr	6.1896	0.307318	1.03808	5.93155	0.872417	1.03124		Total StErr	9.20869	0.2	0.767243	3.29545	7.51399	0.552351
	Total n	11	11	11	11	11	11		Total n	6	6	6	6	6	6		Total n	5	5	5	5	5	5
	Synapse Counts P7								Synapse Counts P14								Synapse Counts P28
	22.6kHz								22.6kHz								22.6kHz
		Ribbons	IHCs	Ribbon:IHC Ratio	Ribbons w/ Terminals	Ribbons w/o Terminals	Synapse:IHC Ratio			Ribbons	IHCs	Ribbon:IHC Ratio	Ribbons w/ Terminals	Ribbons w/o Terminals	Synapse:IHC Ratio			Ribbons	IHCs	Ribbon:IHC Ratio	Ribbons w/ Terminals	Ribbons w/o Terminals	Synapse:IHC Ratio
	Control								Control								Control
	1081821-P7L1C	323	8	40.375	323	0	40.375		1081820-P14R1C	146	8	18.25	146	0	18.25		1249686-P28L1C	187	10	18.7	187	0	18.7
	1081821-P7L2C	333	8	41.625	333	0	41.625		1081820-P14R2C	151	8	18.875	151	0	18.875		1249686-P28L2C	192	10	19.2	192	0	19.2
	1081821-P7L4C	289	8	36.125	289	0	36.125		1081821-P14L1C	155	8	19.375	155	0	19.375		1249686-P28L3C	217	11	19.7273	217	0	19.7273
	1081821-P7R3C	282	8	35.25	282	0	35.25		1081821-P14L2C	147	8	18.375	147	0	18.375		1249686-P28L4C	191	11	17.3636	191	0	17.3636
									1081821-P14L3C	122	8	15.25	122	0	15.25
									1221818-P14L1C	145	9	16.1111	145	0	16.1111
									1221818-P14L2C	144	8	18	144	0	18
									1221818-P14L3C	163	9	18.1111	163	0	18.1111
									1221818-P14L4C	156	8	19.5	156	0	19.5
	Total Average	306.75	8	38.3438	306.75	0	38.3438		Total Average	147.667	8.22222	17.983	147.667	0	17.983		Total Average	196.75	10.5	18.7477	196.75	0	18.7477
	Total StDev	25.0383	0	3.12979	25.0383	0	3.12979		Total StDev	11.4673	0.440959	1.4252	11.4673	0	1.4252		Total StDev	13.6717	0.57735	1.01358	13.6717	0	1.01358
	Total StErr	12.5192	0	1.56489	12.5192	0	1.56489		Total StErr	3.82245	0.146986	0.475066	3.82245	0	0.475066		Total StErr	6.83587	0.288675	0.506791	6.83587	0	0.506791
	Total n	4	4	4	4	4	4		Total n	9	9	9	9	9	9		Total n	4	4	4	4	4	4
	Tmc-/-								Tmc-/-								Tmc-/-
	1087045-P7R1C	407	7	58.1429	407	0	58.1429		1131715-P14L1C	156	8	19.5	152	4	19		1087603-P28L1C	108	9	12	9	99	11
	1087045-P7R2C	346	7	49.4286	346	0	49.4286		1131715-P14L2C	190	9	21.1111	188	2	20.8889		1087603-P28L2C	96	10	9.6	5	91	9.1
	1087045-P7R3C	375	7	53.5714	375	0	53.5714		1131715-P14L1C	147	10	14.7	146	1	14.6		1087603-P28L3C	104	9	11.5556	9	95	10.5556
	1087045-P7L1C	319	7	45.5714	318	1	45.4286		1131715-P14L2C	140	10	14	137	3	13.7		1249700-P28L1C	78	9	8.66667	0	78	8.66667
	1087045-P7L2C	384	7	54.8571	383	1	54.7143		1131715-P14L3C	146	10	14.6	146	0	14.6		1249700-P28L2C	102	9	11.3333	2	100	11.1111
	1131715-P7L1C	438	7	62.5714	438	0	62.5714		1131715-P14L4C	137	9	15.2222	135	2	15
	1131715-P7L2C	439	7	62.7143	439	0	62.7143
	1087603-P7L1C	510	10	51	510	0	51
	1087603-P7L2C	398	8	49.75	398	0	49.75
	1087603-P7L3C	459	9	51	457	2	50.7778
	1087603-P7L4C	451	8	56.375	451	0	56.375
	1087603-P7R3C	393	8	49.125	389	4	48.625
	Total Average	409.917	7.66667	53.6756	409.25	0.666667	53.5916		Total Average	152.667	9.33333	16.5222	150.667	2	16.2981		Total Average	97.6	9.2	10.6311	5	92.6	10.0867
	Total StDev	52.5936	0.984732	5.42414	52.7569	1.23091	5.49055		Total StDev	19.4285	0.816497	2.99974	19.346	1.41421	2.91815		Total StDev	11.7813	0.447214	1.42687	4.06202	8.90505	1.12843
	Total StErr	15.1825	0.284268	1.56581	15.2296	0.355335	1.58499		Total StErr	7.93165	0.333333	1.22464	7.89796	0.57735	1.19133		Total StErr	5.26878	0.2	0.638115	1.81659	3.98246	0.50465
	Total n	12	12	12	12	12	12		Total n	6	6	6	6	6	6		Total n	5	5	5	5	5	5
	Synapse Counts P7								Synapse Counts P14								Synapse Counts P28
	32.0kHz								32.0kHz								32.0kHz
		Ribbons	IHCs	Ribbon:IHC Ratio	Ribbons w/ Terminals	Ribbons w/o Terminals	Synapse:IHC Ratio			Ribbons	IHCs	Ribbon:IHC Ratio	Ribbons w/ Terminals	Ribbons w/o Terminals	Synapse:IHC Ratio			Ribbons	IHCs	Ribbon:IHC Ratio	Ribbons w/ Terminals	Ribbons w/o Terminals	Synapse:IHC Ratio
	Control								Control								Control
	1081821-P7L1C	312	9	34.6667	312	0	34.6667		1081820-P14R1C	157	8	19.625	157	0	19.625		1249686-P28L1C	168	9	18.6667	168	0	18.6667
	1081821-P7L2C	299	8	37.375	299	0	37.375		1081820-P14R2C	154	8	19.25	154	0	19.25		1249686-P28L2C	182	9	20.2222	182	0	20.2222
	1081821-P7L4C	313	9	34.7778	311	2	34.5556		1081821-P14L1C	154	8	19.25	154	0	19.25		1249686-P28L3C	180	10	18	180	0	18
	1081821-P7R3C	241	8	30.125	241	0	30.125		1081821-P14L2C	124	8	15.5	124	0	15.5		1249686-P28L4C	153	9	17	153	0	17
									1081821-P14L3C	151	8	18.875	151	0	18.875
									1221818-P14L1C	146	8	18.25	146	0	18.25
									1221818-P14L2C	142	8	17.75	142	0	17.75
									1221818-P14L3C	158	8	19.75	158	0	19.75
									1221818-P14L4C	151	8	18.875	151	0	18.875
	Total Average	291.25	8.5	34.2361	290.75	0.5	34.1806		Total Average	148.556	8	18.5694	148.556	0	18.5694		Total Average	170.75	9.25	18.4722	170.75	0	18.4722
	Total StDev	34.1016	0.57735	3.0129	33.6885	1	3.00161		Total StDev	10.5132	0	1.31415	10.5132	0	1.31415		Total StDev	13.351	0.5	1.35287	13.351	0	1.35287
	Total StErr	17.0508	0.288675	1.50645	16.8443	0.5	1.5008		Total StErr	3.50441	0	0.438051	3.50441	0	0.438051		Total StErr	6.67551	0.25	0.676433	6.67551	0	0.676433
	Total n	4	4	4	4	4	4		Total n	9	9	9	9	9	9		Total n	4	4	4	4	4	4
	Tmc-/-								Tmc-/-								Tmc-/-
	1087045-P7R1C	393	7	56.1429	393	0	56.1429		1131715-P14L1C	117	8	14.625	115	2	14.375		1087603-P28L1C	73	10	7.3	4	69	6.9
	1087045-P7R2C	310	7	44.2857	310	0	44.2857		1131715-P14L2C	138	8	17.25					1087603-P28L2C	90	9	10	9	81	9
	1087045-P7R3C	378	7	54	378	0	54		1131715-P14L1C	117	9	13	116	1	12.8889		1087603-P28L3C	91	10	9.1	10	81	8.1
	1087045-P7L1C								1131715-P14L2C	98	8	12.25	98	0	12.25		1249700-P28L1C	85	10	8.5	1	84	8.4
	1087045-P7L2C	385	7	55	385	0	55		1131715-P14L3C	155	10	15.5	155	0	15.5		1249700-P28L2C	88	10	8.8	1	87	8.7
	1131715-P7L1C	365	7	52.1429	365	0	52.1429		1131715-P14L4C	113	9	12.5556	113	0	12.5556
	1131715-P7L2C	366	7	52.2857	366	0	52.2857
	1087603-P7L1C	343	8	42.875	343	0	42.875
	1087603-P7L2C	395	8	49.375	394	1	49.25
	1087603-P7L3C	345	8	43.125	345	0	43.125
	1087603-P7L4C	438	9	48.6667	438	0	48.6667
	1087603-P7R3C	364	8	45.5	358	6	44.75
	Total Average	371.091	7.54545	49.3999	370.455	0.636364	49.3203		Total Average	123	8.66667	14.1968	119.4	0.6	13.5139		Total Average	85.4	9.8	8.74	5	80.4	8.22
	Total StDev	33.294	0.687552	4.87537	33.3987	1.80404	4.94021		Total StDev	20.2287	0.816497	1.95549	21.1967	0.894427	1.37773		Total StDev	7.30068	0.447214	0.981326	4.30116	6.84105	0.810555
	Total StErr	10.0385	0.207305	1.46998	10.0701	0.543937	1.48953		Total StErr	8.25833	0.333333	0.798327	9.47945	0.4	0.616141		Total StErr	3.26497	0.2	0.438862	1.92354	3.05941	0.362491
	Total n	11	11	11	11	11	11		Total n	6	6	6	5	5	5		Total n	5	5	5	5	5	5

## Sheet: Fig. 3A-C Tmc1 KO + Tmc2KO
				Tmc1 KO								Tmc2 KO								Tmc1 KO								Tmc2 KO								Tmc1 KO								Tmc2 KO
	Synapse Counts P7								Synapse Counts P7								Synapse Counts P14								Synapse Counts P14								Synapse Counts P28								Synapse Counts P28
	8.0kHz								8.0kHz								8.0kHz								8.0kHz								8.0kHz								8.0kHz
		Ribbons	IHCs	Ribbon:IHC Ratio	Ribbons w/ Terminals	Ribbons w/o Terminals	Synapse:IHC Ratio			Ribbons	IHCs	Ribbon:IHC Ratio	Ribbons w/ Terminals	Ribbons w/o Terminals	Synapse:IHC Ratio			Ribbons	IHCs	Ribbon:IHC Ratio	Ribbons w/ Terminals	Ribbons w/o Terminals	Synapse:IHC Ratio			Ribbons	IHCs	Ribbon:IHC Ratio	Ribbons w/ Terminals	Ribbons w/o Terminals	Synapse:IHC Ratio			Ribbons	IHCs	Ribbon:IHC Ratio	Ribbons w/ Terminals	Ribbons w/o Terminals	Synapse:IHC Ratio			Ribbons	IHCs	Ribbon:IHC Ratio	Ribbons w/ Terminals	Ribbons w/o Terminals	Synapse:IHC Ratio
	Control								Control								Control								Control								Control								Control
	1081821-P7L1C	312	8	39	312	0	39		1081821-P7L1C	312	8	39	312	0	39		1081820-P14R1C	115	8	14.375	114	1	14.25		1081820-P14R1C	115	8	14.375	114	1	14.25		1249686-P28L1C	152	10	15.2	152	0	15.2		1249686-P28L1C	152	10	15.2	152	0	15.2
	1081821-P7L2C	282	8	35.25	282	0	35.25		1081821-P7L2C	282	8	35.25	282	0	35.25		1081820-P14R2C	132	9	14.6667	132	0	14.6667		1081820-P14R2C	132	9	14.6667	132	0	14.6667		1249686-P28L2C	141	9	15.6667	141	0	15.6667		1249686-P28L2C	141	9	15.6667	141	0	15.6667
	1081821-P7L4C	309	8	38.625	309	0	38.625		1081821-P7L4C	309	8	38.625	309	0	38.625		1081821-P14L1C	127	8	15.875	127	0	15.875		1081821-P14L1C	127	8	15.875	127	0	15.875		1249686-P28L3C	150	9	16.6667	150	0	16.6667		1249686-P28L3C	150	9	16.6667	150	0	16.6667
	1081821-P7R3C	303	8	37.875	303	0	37.875		1081821-P7R3C	303	8	37.875	303	0	37.875		1081821-P14L2C	152	8	19	151	1	18.875		1081821-P14L2C	152	8	19	151	1	18.875		1249686-P28L4C	140	9	15.5556	140	0	15.5556		1249686-P28L4C	140	9	15.5556	140	0	15.5556
																	1081821-P14L3C	139	9	15.4444	139	0	15.4444		1081821-P14L3C	139	9	15.4444	139	0	15.4444
																	1221818-P14L1C	130	8	16.25	130	0	16.25		1221818-P14L1C	130	8	16.25	130	0	16.25
																	1221818-P14L2C	128	8	16	128	0	16		1221818-P14L2C	128	8	16	128	0	16
																	1221818-P14L3C	124	8	15.5	124	0	15.5		1221818-P14L3C	124	8	15.5	124	0	15.5
																	1221818-P14L4C	159	9	17.6667	159	0	17.6667		1221818-P14L4C	159	9	17.6667	159	0	17.6667
	Total Average	301.5	8	37.6875	301.5	0	37.6875		Total Average	301.5	8	37.6875	301.5	0	37.6875		Total Average	134	8.33333	16.0864	133.778	0.222222	16.0586		Total Average	134	8.33333	16.0864	133.778	0.222222	16.0586		Total Average	145.75	9.25	15.7722	145.75	0	15.7722		Total Average	145.75	9.25	15.7722	145.75	0	15.7722
	Total StDev	13.5277	0	1.69097	13.5277	0	1.69097		Total StDev	13.5277	0	1.69097	13.5277	0	1.69097		Total StDev	13.8744	0.5	1.44766	13.8904	0.440959	1.43568		Total StDev	13.8744	0.5	1.44766	13.8904	0.440959	1.43568		Total StDev	6.13052	0.5	0.628638	6.13052	0	0.628638		Total StDev	6.13052	0.5	0.628638	6.13052	0	0.628638
	Total StErr	6.76387	0	0.845484	6.76387	0	0.845484		Total StErr	6.76387	0	0.845484	6.76387	0	0.845484		Total StErr	4.62481	0.166667	0.482553	4.63015	0.146986	0.478561		Total StErr	4.62481	0.166667	0.482553	4.63015	0.146986	0.478561		Total StErr	3.06526	0.25	0.314319	3.06526	0	0.314319		Total StErr	3.06526	0.25	0.314319	3.06526	0	0.314319
	Total n	4	4	4	4	4	4		Total n	4	4	4	4	4	4		Total n	9	9	9	9	9	9		Total n	9	9	9	9	9	9		Total n	4	4	4	4	4	4		Total n	4	4	4	4	4	4
	Tmc-/+								Tmc+/-								Tmc-/+								Tmc+/-								Tmc-/+								Tmc+/-
	1221945-P7R1C	449	11	40.8182	449	0	40.8182		1249506-P710R	426	9	47.3333	426	0	47.3333		1249691-P14L1C	160	9	17.7778	154	6	17.1111		1249506-L1C	159	9	17.6667	153	6	17		1249510-L1C	127	9	14.1111	119	8	13.2222		1249509-L1C	138	9	15.3333	138	0	15.3333
	1221945-P7R2C	353	9	39.2222	353	0	39.2222		1249506-P780L	387	9	43	386	1	42.8889		1249691-P14L2C	174	9	19.3333	174	0	19.3333		1249506-L2C	154	10	15.4	154	0	15.4		1249510-L2C	101	9	11.2222	100	1	11.1111		1221934-L1C	148	9	16.4444	148	0	16.4444
	1221945-P7R3C	387	10	38.7	387	0	38.7		1249506-P7110L	430	9	47.7778	430	0	47.7778		1249691-P14L3C	165	9	18.3333	165	0	18.3333		1249506-L3C	150	10	15	150	0	15		1249510-L3C	89	9	9.88889	89	0	9.88889		1249533-L1C-8	172	10	17.2	170	2	17
	1249656-P7R2C	371	9	41.2222	371	0	41.2222		1249506-P71080L	354	9	39.3333	354	0	39.3333		1249691-P14L4C	208	10	20.8	207	1	20.7		1249506-L4C	143	9	15.8889	143	0	15.8889		1249510-L4C	142	11	12.9091	137	5	12.4545		1249533-L1C-80	157	10	15.7	157	0	15.7
																									1249506-L5C	143	9	15.8889	143	0	15.8889
	Total Average	390	9.75	39.9907	390	0	39.9907		Total Average	399.25	9	44.3611	399	0.25	44.3333		Total Average	176.75	9.25	19.0611	175	1.75	18.8694		Total Average	149.8	9.4	15.9689	148.6	1.2	15.8356		Total Average	114.75	9.5	12.0328	111.25	3.5	11.6692		Total Average	153.75	9.5	16.1694	153.25	0.5	16.1194
	Total StDev	41.7133	0.957427	1.21899	41.7133	0	1.21899		Total StDev	35.8643	0	3.98493	35.9815	0.5	3.99794		Total StDev	21.6237	0.5	1.32595	22.8473	2.87228	1.52154		Total StDev	6.97854	0.547723	1.01951	5.31977	2.68328	0.749914		Total StDev	24.116	1	1.85658	21.1719	3.69685	1.47305		Total StDev	14.4309	0.57735	0.828076	13.5984	1	0.747196
	Total StErr	20.8567	0.478714	0.609497	20.8567	0	0.609497		Total StErr	17.9322	0	1.99246	17.9907	0.25	1.99897		Total StErr	10.8118	0.25	0.662976	11.4237	1.43614	0.760771		Total StErr	3.1209	0.244949	0.45594	2.37908	1.2	0.335372		Total StErr	12.058	0.5	0.928289	10.586	1.84842	0.736524		Total StErr	7.21543	0.288675	0.414038	6.7992	0.5	0.373598
	Total n	4	4	4	4	4	4		Total n	4	4	4	4	4	4		Total n	4	4	4	4	4	4		Total n	5	5	5	5	5	5		Total n	4	4	4	4	4	4		Total n	4	4	4	4	4	4
	Synapse Counts P7								Synapse Counts P7								Synapse Counts P14								Synapse Counts P14								Synapse Counts P28								Synapse Counts P28
	11.3kHz								11.3kHz								11.3kHz								11.3kHz								11.3kHz								11.3kHz
		Ribbons	IHCs	Ribbon:IHC Ratio	Ribbons w/ Terminals	Ribbons w/o Terminals	Synapse:IHC Ratio			Ribbons	IHCs	Ribbon:IHC Ratio	Ribbons w/ Terminals	Ribbons w/o Terminals	Synapse:IHC Ratio			Ribbons	IHCs	Ribbon:IHC Ratio	Ribbons w/ Terminals	Ribbons w/o Terminals	Synapse:IHC Ratio			Ribbons	IHCs	Ribbon:IHC Ratio	Ribbons w/ Terminals	Ribbons w/o Terminals	Synapse:IHC Ratio			Ribbons	IHCs	Ribbon:IHC Ratio	Ribbons w/ Terminals	Ribbons w/o Terminals	Synapse:IHC Ratio			Ribbons	IHCs	Ribbon:IHC Ratio	Ribbons w/ Terminals	Ribbons w/o Terminals	Synapse:IHC Ratio
	Control								Control								Control								Control								Control								Control
	1081821-P7L1C	277	8	34.625	276	1	34.5		1081821-P7L1C	277	8	34.625	276	1	34.5		1081820-P14R1C	176	9	19.5556	176	0	19.5556		1081820-P14R1C	176	9	19.5556	176	0	19.5556		1249686-P28L1C	152	10	15.2	152	0	15.2		1249686-P28L1C	152	10	15.2	152	0	15.2
	1081821-P7L2C	311	8	38.875	310	1	38.75		1081821-P7L2C	311	8	38.875	310	1	38.75		1081820-P14R2C	136	8	17	136	0	17		1081820-P14R2C	136	8	17	136	0	17		1249686-P28L2C	149	9	16.5556	148	1	16.4444		1249686-P28L2C	149	9	16.5556	148	1	16.4444
	1081821-P7L4C	411	10	41.1	409	2	40.9		1081821-P7L4C	411	10	41.1	409	2	40.9		1081821-P14L1C	137	8	17.125	137	0	17.125		1081821-P14L1C	137	8	17.125	137	0	17.125		1249686-P28L3C	168	9	18.6667	168	0	18.6667		1249686-P28L3C	168	9	18.6667	168	0	18.6667
	1081821-P7R3C	304	8	38	303	1	37.875		1081821-P7R3C	304	8	38	303	1	37.875		1081821-P14L2C	136	8	17	135	1	16.875		1081821-P14L2C	136	8	17	135	1	16.875		1249686-P28L4C	164	10	16.4	164		16.4		1249686-P28L4C	164	10	16.4	164		16.4
																	1081821-P14L3C	126	8	15.75	126	0	15.75		1081821-P14L3C	126	8	15.75	126	0	15.75
																	1221818-P14L1C	152	9	16.8889	152	0	16.8889		1221818-P14L1C	152	9	16.8889	152	0	16.8889
																	1221818-P14L2C	131	8	16.375	131	0	16.375		1221818-P14L2C	131	8	16.375	131	0	16.375
																	1221818-P14L3C	149	8	18.625	149	0	18.625		1221818-P14L3C	149	8	18.625	149	0	18.625
																	1221818-P14L4C	152	9	16.8889	152	0	16.8889		1221818-P14L4C	152	9	16.8889	152	0	16.8889
	Total Average	325.75	8.5	38.15	324.5	1.25	38.0063		Total Average	325.75	8.5	38.15	324.5	1.25	38.0063		Total Average	143.889	8.33333	17.2454	143.778	0.111111	17.2315		Total Average	143.889	8.33333	17.2454	143.778	0.111111	17.2315		Total Average	158.25	9.5	16.7056	158	0.333333	16.6778		Total Average	158.25	9.5	16.7056	158	0.333333	16.6778
	Total StDev	58.6934	1	2.68801	58.2094	0.5	2.6607		Total StDev	58.6934	1	2.68801	58.2094	0.5	2.6607		Total StDev	15.1941	0.5	1.15234	15.2625	0.333333	1.15641		Total StDev	15.1941	0.5	1.15234	15.2625	0.333333	1.15641		Total StDev	9.17878	0.57735	1.44089	9.5219	0.57735	1.44581		Total StDev	9.17878	0.57735	1.44089	9.5219	0.57735	1.44581
	Total StErr	29.3467	0.5	1.34401	29.1047	0.25	1.33035		Total StErr	29.3467	0.5	1.34401	29.1047	0.25	1.33035		Total StErr	5.0647	0.166667	0.384113	5.08751	0.111111	0.385471		Total StErr	5.0647	0.166667	0.384113	5.08751	0.111111	0.385471		Total StErr	4.58939	0.288675	0.720447	4.76095	0.333333	0.722906		Total StErr	4.58939	0.288675	0.720447	4.76095	0.333333	0.722906
	Total n	4	4	4	4	4	4		Total n	4	4	4	4	4	4		Total n	9	9	9	9	9	9		Total n	9	9	9	9	9	9		Total n	4	4	4	4	3	4		Total n	4	4	4	4	3	4
	Tmc-/+								Tmc+/-								Tmc-/+								Tmc+/-								Tmc-/+								Tmc+/-
	1221945-P7R1C	394	10	39.4	394	0	39.4		1249506-P710R	430	9	47.7778	430	0	47.7778		1249691-P14L1C	188	10	18.8	185	3	18.5		1249506-L1C	167	9	18.5556	166	1	18.4444		1249510-L1C	119	9	13.2222	114	5	12.6667		1249509-L1C	150	9	16.6667	150	0	16.6667
	1221945-P7R2C	361	10	36.1	361	0	36.1		1249506-P780L	380	9	42.2222	380	0	42.2222		1249691-P14L2C	149	9	16.5556	147	2	16.3333		1249506-L2C	169	9	18.7778	169	0	18.7778		1249510-L2C	110	10	11	110	0	11		1221934-L1C	179	11	16.2727	179	0	16.2727
	1221945-P7R3C	404	9	44.8889	404	0	44.8889		1249506-P7110L	414	9	46	414	0	46		1249691-P14L3C	179	10	17.9	172	7	17.2		1249506-L3C	159	9	17.6667	159	0	17.6667		1249510-L3C	88	8	11	87	1	10.875		1249533-L1C-8	197	10	19.7	196	1	19.6
	1249656-P7R2C	362	9	40.2222	362	0	40.2222		1249506-P71080L	370	9	41.1111	370	0	41.1111		1249691-P14L4C	151	9	16.7778	151	0	16.7778		1249506-L4C	164	9	18.2222	164	0	18.2222		1249510-L4C	95	9	10.5556	95	0	10.5556		1249533-L1C-80	179	11	16.2727	179	0	16.2727
																									1249506-L5C	157	9	17.4444	157	0	17.4444
	Total Average	380.25	9.5	40.1528	380.25	0	40.1528		Total Average	398.5	9	44.2778	398.5	0	44.2778		Total Average	166.75	9.5	17.5083	163.75	3	17.2028		Total Average	163.2	9	18.1333	163	0.2	18.1111		Total Average	103	9	11.4444	101.5	1.5	11.2743		Total Average	176.25	10.25	17.228	176	0.25	17.203
	Total StDev	22.036	0.57735	3.62525	22.036	0	3.62525		Total StDev	28.2076	0	3.13417	28.2076	0	3.13417		Total StDev	19.7041	0.57735	1.04296	17.9141	2.94392	0.934407		Total StDev	5.11859	0	0.568733	4.94975	0.447214	0.549972		Total StDev	14.0712	0.816497	1.20356	12.6623	2.38048	0.946918		Total StDev	19.4487	0.957427	1.65841	19.0962	0.5	1.60873
	Total StErr	11.018	0.288675	1.81262	11.018	0	1.81262		Total StErr	14.1038	0	1.56709	14.1038	0	1.56709		Total StErr	9.85203	0.288675	0.52148	8.95707	1.47196	0.467204		Total StErr	2.2891	0	0.254345	2.21359	0.2	0.245955		Total StErr	7.03562	0.408248	0.601781	6.33114	1.19024	0.473459		Total StErr	9.72433	0.478714	0.829205	9.54812	0.25	0.804367
	Total n	4	4	4	4	4	4		Total n	4	4	4	4	4	4		Total n	4	4	4	4	4	4		Total n	5	5	5	5	5	5		Total n	4	4	4	4	4	4		Total n	4	4	4	4	4	4
	Synapse Counts P7								Synapse Counts P7								Synapse Counts P14								Synapse Counts P14								Synapse Counts P28								Synapse Counts P28
	16.0kHz								16.0kHz								16.0kHz								16.0kHz								16.0kHz								16.0kHz
		Ribbons	IHCs	Ribbon:IHC Ratio	Ribbons w/ Terminals	Ribbons w/o Terminals	Synapse:IHC Ratio			Ribbons	IHCs	Ribbon:IHC Ratio	Ribbons w/ Terminals	Ribbons w/o Terminals	Synapse:IHC Ratio			Ribbons	IHCs	Ribbon:IHC Ratio	Ribbons w/ Terminals	Ribbons w/o Terminals	Synapse:IHC Ratio			Ribbons	IHCs	Ribbon:IHC Ratio	Ribbons w/ Terminals	Ribbons w/o Terminals	Synapse:IHC Ratio			Ribbons	IHCs	Ribbon:IHC Ratio	Ribbons w/ Terminals	Ribbons w/o Terminals	Synapse:IHC Ratio			Ribbons	IHCs	Ribbon:IHC Ratio	Ribbons w/ Terminals	Ribbons w/o Terminals	Synapse:IHC Ratio
	Control								Control								Control								Control								Control								Control
	1081821-P7L1C	334	8	41.75	332	2	41.5		1081821-P7L1C	334	8	41.75	332	2	41.5		1081820-P14R1C	145	8	18.125	145	0	18.125		1081820-P14R1C	145	8	18.125	145	0	18.125		1249686-P28L1C	192	10	19.2	192	0	19.2		1249686-P28L1C	192	10	19.2	192	0	19.2
	1081821-P7L2C	318	8	39.75	318	0	39.75		1081821-P7L2C	318	8	39.75	318	0	39.75		1081820-P14R2C	153	8	19.125	153	0	19.125		1081820-P14R2C	153	8	19.125	153	0	19.125		1249686-P28L2C	169	9	18.7778	169	0	18.7778		1249686-P28L2C	169	9	18.7778	169	0	18.7778
	1081821-P7L4C	362	9	40.2222	361	1	40.1111		1081821-P7L4C	362	9	40.2222	361	1	40.1111		1081821-P14L1C	147	8	18.375	147	0	18.375		1081821-P14L1C	147	8	18.375	147	0	18.375		1249686-P28L3C	194	10	19.4	194	0	19.4		1249686-P28L3C	194	10	19.4	194	0	19.4
	1081821-P7R3C	314	8	39.25	312	2	39		1081821-P7R3C	314	8	39.25	312	2	39		1081821-P14L2C	147	8	18.375	147	0	18.375		1081821-P14L2C	147	8	18.375	147	0	18.375		1249686-P28L4C	170	10	17	170	0	17		1249686-P28L4C	170	10	17	170	0	17
																	1081821-P14L3C	113	8	14.125	113	0	14.125		1081821-P14L3C	113	8	14.125	113	0	14.125
																	1221818-P14L1C	131	8	16.375	131	0	16.375		1221818-P14L1C	131	8	16.375	131	0	16.375
																	1221818-P14L2C	133	8	16.625	133	0	16.625		1221818-P14L2C	133	8	16.625	133	0	16.625
																	1221818-P14L3C	128	8	16	128	0	16		1221818-P14L3C	128	8	16	128	0	16
																	1221818-P14L4C	155	8	19.375	155	0	19.375		1221818-P14L4C	155	8	19.375	155	0	19.375
	Total Average	332	8.25	40.2431	330.75	1.25	40.0903		Total Average	332	8.25	40.2431	330.75	1.25	40.0903		Total Average	139.111	8	17.3889	139.111	0	17.3889		Total Average	139.111	8	17.3889	139.111	0	17.3889		Total Average	181.25	9.75	18.5944	181.25	0	18.5944		Total Average	181.25	9.75	18.5944	181.25	0	18.5944
	Total StDev	21.7868	0.5	1.08021	21.8384	0.957427	1.04758		Total StDev	21.7868	0.5	1.08021	21.8384	0.957427	1.04758		Total StDev	13.7518	0	1.71897	13.7518	0	1.71897		Total StDev	13.7518	0	1.71897	13.7518	0	1.71897		Total StDev	13.5984	0.5	1.09415	13.5984	0	1.09415		Total StDev	13.5984	0.5	1.09415	13.5984	0	1.09415
	Total StErr	10.8934	0.25	0.540106	10.9192	0.478714	0.523788		Total StErr	10.8934	0.25	0.540106	10.9192	0.478714	0.523788		Total StErr	4.58392	0	0.57299	4.58392	0	0.57299		Total StErr	4.58392	0	0.57299	4.58392	0	0.57299		Total StErr	6.7992	0.25	0.547074	6.7992	0	0.547074		Total StErr	6.7992	0.25	0.547074	6.7992	0	0.547074
	Total n	4	4	4	4	4	4		Total n	4	4	4	4	4	4		Total n	9	9	9	9	9	9		Total n	9	9	9	9	9	9		Total n	4	4	4	4	4	4		Total n	4	4	4	4	4	4
	Tmc-/+								Tmc+/-								Tmc-/+								Tmc+/-								Tmc-/+								Tmc+/-
	1221945-P7R1C	352	9	39.1111	352	0	39.1111		1249506-P710R	417	9	46.3333	417	0	46.3333		1249691-P14L1C	147	9	16.3333	147	0	16.3333		1249506-L1C	168	9	18.6667	168	0	18.6667		1249510-L1C	117	10	11.7	116	1	11.6		1249509-L1C	160	9	17.7778	160	0	17.7778
	1221945-P7R2C	345	9	38.3333	345	0	38.3333		1249506-P780L	394	9	43.7778	394	0	43.7778		1249691-P14L2C	139	9	15.4444	139	0	15.4444		1249506-L2C	177	9	19.6667	177	0	19.6667		1249510-L2C	107	9	11.8889	105	2	11.6667		1221934-L1C	211	11	19.1818	211	0	19.1818
	1221945-P7R3C	367	9	40.7778	367	0	40.7778		1249506-P7110L	376	9	41.7778	376	0	41.7778		1249691-P14L3C	172	10	17.2	172	0	17.2		1249506-L3C	174	9	19.3333	174	0	19.3333		1249510-L3C	103	10	10.3	102	1	10.2		1249533-L1C-8	186	9	20.6667	186	0	20.6667
	1249656-P7R2C	395	9	43.8889	395	0	43.8889		1249506-P71080L	370	9	41.1111	370	0	41.1111		1249691-P14L4C	144	9	16	144	0	16		1249506-L4C	176	10	17.6	176	0	17.6		1249510-L4C	126	10	12.6	124	2	12.4		1249533-L1C-80	176	9	19.5556	175	1	19.4444
																									1249506-L5C	185	10	18.5	185	0	18.5
	Total Average	364.75	9	40.5278	364.75	0	40.5278		Total Average	389.25	9	43.25	389.25	0	43.25		Total Average	150.5	9.25	16.2444	150.5	0	16.2444		Total Average	176	9.4	18.7533	176	0	18.7533		Total Average	113.25	9.75	11.6222	111.75	1.5	11.4667		Total Average	183.25	9.5	19.2955	183	0.25	19.2677
	Total StDev	22.1566	0	2.46185	22.1566	0	2.46185		Total StDev	21.1246	0	2.34718	21.1246	0	2.34718		Total StDev	14.7083	0.5	0.735015	14.7083	0	0.735015		Total StDev	6.12372	0.547723	0.801942	6.12372	0	0.801942		Total StDev	10.3401	0.5	0.962892	10.1448	0.57735	0.918937		Total StDev	21.3756	1	1.19222	21.4942	0.5	1.18541
	Total StErr	11.0783	0	1.23092	11.0783	0	1.23092		Total StErr	10.5623	0	1.17359	10.5623	0	1.17359		Total StErr	7.35414	0.25	0.367507	7.35414	0	0.367507		Total StErr	2.73861	0.244949	0.358639	2.73861	0	0.358639		Total StErr	5.17003	0.25	0.481446	5.07239	0.288675	0.459468		Total StErr	10.6878	0.5	0.596108	10.7471	0.25	0.592705
	Total n	4	4	4	4	4	4		Total n	4	4	4	4	4	4		Total n	4	4	4	4	4	4		Total n	5	5	5	5	5	5		Total n	4	4	4	4	4	4		Total n	4	4	4	4	4	4
	Synapse Counts P7								Synapse Counts P7								Synapse Counts P14								Synapse Counts P14								Synapse Counts P28								Synapse Counts P28
	22.6kHz								22.6kHz								22.6kHz								22.6kHz								22.6kHz								22.6kHz
		Ribbons	IHCs	Ribbon:IHC Ratio	Ribbons w/ Terminals	Ribbons w/o Terminals	Synapse:IHC Ratio			Ribbons	IHCs	Ribbon:IHC Ratio	Ribbons w/ Terminals	Ribbons w/o Terminals	Synapse:IHC Ratio			Ribbons	IHCs	Ribbon:IHC Ratio	Ribbons w/ Terminals	Ribbons w/o Terminals	Synapse:IHC Ratio			Ribbons	IHCs	Ribbon:IHC Ratio	Ribbons w/ Terminals	Ribbons w/o Terminals	Synapse:IHC Ratio			Ribbons	IHCs	Ribbon:IHC Ratio	Ribbons w/ Terminals	Ribbons w/o Terminals	Synapse:IHC Ratio			Ribbons	IHCs	Ribbon:IHC Ratio	Ribbons w/ Terminals	Ribbons w/o Terminals	Synapse:IHC Ratio
	Control								Control								Control								Control								Control								Control
	1081821-P7L1C	323	8	40.375	323	0	40.375		1081821-P7L1C	323	8	40.375	323	0	40.375		1081820-P14R1C	146	8	18.25	146	0	18.25		1081820-P14R1C	146	8	18.25	146	0	18.25		1249686-P28L1C	187	10	18.7	187	0	18.7		1249686-P28L1C	187	10	18.7	187	0	18.7
	1081821-P7L2C	333	8	41.625	333	0	41.625		1081821-P7L2C	333	8	41.625	333	0	41.625		1081820-P14R2C	151	8	18.875	151	0	18.875		1081820-P14R2C	151	8	18.875	151	0	18.875		1249686-P28L2C	192	10	19.2	192	0	19.2		1249686-P28L2C	192	10	19.2	192	0	19.2
	1081821-P7L4C	289	8	36.125	289	0	36.125		1081821-P7L4C	289	8	36.125	289	0	36.125		1081821-P14L1C	155	8	19.375	155	0	19.375		1081821-P14L1C	155	8	19.375	155	0	19.375		1249686-P28L3C	217	11	19.7273	217	0	19.7273		1249686-P28L3C	217	11	19.7273	217	0	19.7273
	1081821-P7R3C	282	8	35.25	282	0	35.25		1081821-P7R3C	282	8	35.25	282	0	35.25		1081821-P14L2C	147	8	18.375	147	0	18.375		1081821-P14L2C	147	8	18.375	147	0	18.375		1249686-P28L4C	191	11	17.3636	191	0	17.3636		1249686-P28L4C	191	11	17.3636	191	0	17.3636
																	1081821-P14L3C	122	8	15.25	122	0	15.25		1081821-P14L3C	122	8	15.25	122	0	15.25
																	1221818-P14L1C	145	9	16.1111	145	0	16.1111		1221818-P14L1C	145	9	16.1111	145	0	16.1111
																	1221818-P14L2C	144	8	18	144	0	18		1221818-P14L2C	144	8	18	144	0	18
																	1221818-P14L3C	163	9	18.1111	163	0	18.1111		1221818-P14L3C	163	9	18.1111	163	0	18.1111
																	1221818-P14L4C	156	8	19.5	156	0	19.5		1221818-P14L4C	156	8	19.5	156	0	19.5
	Total Average	306.75	8	38.3438	306.75	0	38.3438		Total Average	306.75	8	38.3438	306.75	0	38.3438		Total Average	147.667	8.22222	17.983	147.667	0	17.983		Total Average	147.667	8.22222	17.983	147.667	0	17.983		Total Average	196.75	10.5	18.7477	196.75	0	18.7477		Total Average	196.75	10.5	18.7477	196.75	0	18.7477
	Total StDev	25.0383	0	3.12979	25.0383	0	3.12979		Total StDev	25.0383	0	3.12979	25.0383	0	3.12979		Total StDev	11.4673	0.440959	1.4252	11.4673	0	1.4252		Total StDev	11.4673	0.440959	1.4252	11.4673	0	1.4252		Total StDev	13.6717	0.57735	1.01358	13.6717	0	1.01358		Total StDev	13.6717	0.57735	1.01358	13.6717	0	1.01358
	Total StErr	12.5192	0	1.56489	12.5192	0	1.56489		Total StErr	12.5192	0	1.56489	12.5192	0	1.56489		Total StErr	3.82245	0.146986	0.475066	3.82245	0	0.475066		Total StErr	3.82245	0.146986	0.475066	3.82245	0	0.475066		Total StErr	6.83587	0.288675	0.506791	6.83587	0	0.506791		Total StErr	6.83587	0.288675	0.506791	6.83587	0	0.506791
	Total n	4	4	4	4	4	4		Total n	4	4	4	4	4	4		Total n	9	9	9	9	9	9		Total n	9	9	9	9	9	9		Total n	4	4	4	4	4	4		Total n	4	4	4	4	4	4
	Tmc-/+								Tmc+/-								Tmc-/+								Tmc+/-								Tmc-/+								Tmc+/-
	1221945-P7R1C	354	9	39.3333	354	0	39.3333		1249506-P710R	389	9	43.2222	388	1	43.1111		1249691-P14L1C	139	9	15.4444	138	1	15.3333		1249506-L1C	153	9	17	153	0	17		1249510-L1C	120	9	13.3333	115	5	12.7778		1249509-L1C	174	10	17.4	174	0	17.4
	1221945-P7R2C	388	10	38.8	388	0	38.8		1249506-P780L	376	9	41.7778	375	1	41.6667		1249691-P14L2C	136	9	15.1111	136	0	15.1111		1249506-L2C	182	9	20.2222	181	1	20.1111		1249510-L2C	113	10	11.3	111	2	11.1		1221934-L1C	187	10	18.7	187	0	18.7
	1221945-P7R3C	400	10	40	400	0	40		1249506-P7110L	339	9	37.6667	339	0	37.6667		1249691-P14L3C	178	10	17.8	172	6	17.2		1249506-L3C	171	9	19	171	0	19		1249510-L3C	105	10	10.5	105	0	10.5		1249533-L1C-8	212	10	21.2	211	1	21.1
	1249656-P7R2C	353	9	39.2222	353	0	39.2222		1249506-P71080L	350	9	38.8889	350	0	38.8889		1249691-P14L4C	141	9	15.6667	141	0	15.6667		1249506-L4C	171	9	19	171	0	19		1249510-L4C	117	10	11.7	114	3	11.4		1249533-L1C-80	211	12	17.5833	211	0	17.5833
																									1249506-L5C	175	10	17.5	175	0	17.5
	Total Average	373.75	9.5	39.3389	373.75	0	39.3389		Total Average	363.5	9	40.3889	363	0.5	40.3333		Total Average	148.5	9.25	16.0056	146.75	1.75	15.8278		Total Average	170.4	9.2	18.5444	170.2	0.2	18.5222		Total Average	113.75	9.75	11.7083	111.25	2.5	11.4444		Total Average	196	10.5	18.7208	195.75	0.25	18.6958
	Total StDev	23.8939	0.57735	0.497028	23.8939	0	0.497028		Total StDev	23.0145	0	2.55717	22.4648	0.57735	2.49609		Total StDev	19.7737	0.5	1.21789	16.9583	2.87228	0.942875		Total StDev	10.7145	0.447214	1.29481	10.4499	0.447214	1.25929		Total StDev	6.5	0.5	1.19269	4.5	2.08167	0.964429		Total StDev	18.6726	1	1.74978	18.3916	0.5	1.70263
	Total StErr	11.9469	0.288675	0.248514	11.9469	0	0.248514		Total StErr	11.5072	0	1.27858	11.2324	0.288675	1.24804		Total StErr	9.88686	0.25	0.608944	8.47914	1.43614	0.471437		Total StErr	4.79166	0.2	0.579058	4.67333	0.2	0.56317		Total StErr	3.25	0.25	0.596343	2.25	1.04083	0.482215		Total StErr	9.33631	0.5	0.874891	9.19579	0.25	0.851316
	Total n	4	4	4	4	4	4		Total n	4	4	4	4	4	4		Total n	4	4	4	4	4	4		Total n	5	5	5	5	5	5		Total n	4	4	4	4	4	4		Total n	4	4	4	4	4	4
	Synapse Counts P7								Synapse Counts P7								Synapse Counts P14								Synapse Counts P14								Synapse Counts P28								Synapse Counts P28
	32.0kHz								32.0kHz								32.0kHz								32.0kHz								32.0kHz								32.0kHz
		Ribbons	IHCs	Ribbon:IHC Ratio	Ribbons w/ Terminals	Ribbons w/o Terminals	Synapse:IHC Ratio			Ribbons	IHCs	Ribbon:IHC Ratio	Ribbons w/ Terminals	Ribbons w/o Terminals	Synapse:IHC Ratio			Ribbons	IHCs	Ribbon:IHC Ratio	Ribbons w/ Terminals	Ribbons w/o Terminals	Synapse:IHC Ratio			Ribbons	IHCs	Ribbon:IHC Ratio	Ribbons w/ Terminals	Ribbons w/o Terminals	Synapse:IHC Ratio			Ribbons	IHCs	Ribbon:IHC Ratio	Ribbons w/ Terminals	Ribbons w/o Terminals	Synapse:IHC Ratio			Ribbons	IHCs	Ribbon:IHC Ratio	Ribbons w/ Terminals	Ribbons w/o Terminals	Synapse:IHC Ratio
	Control								Control								Control								Control								Control								Control
	1081821-P7L1C	312	9	34.6667	312	0	34.6667		1081821-P7L1C	312	9	34.6667	312	0	34.6667		1081820-P14R1C	157	8	19.625	157	0	19.625		1081820-P14R1C	157	8	19.625	157	0	19.625		1249686-P28L1C	168	9	18.6667	168	0	18.6667		1249686-P28L1C	168	9	18.6667	168	0	18.6667
	1081821-P7L2C	299	8	37.375	299	0	37.375		1081821-P7L2C	299	8	37.375	299	0	37.375		1081820-P14R2C	154	8	19.25	154	0	19.25		1081820-P14R2C	154	8	19.25	154	0	19.25		1249686-P28L2C	182	9	20.2222	182	0	20.2222		1249686-P28L2C	182	9	20.2222	182	0	20.2222
	1081821-P7L4C	313	9	34.7778	311	2	34.5556		1081821-P7L4C	313	9	34.7778	311	2	34.5556		1081821-P14L1C	154	8	19.25	154	0	19.25		1081821-P14L1C	154	8	19.25	154	0	19.25		1249686-P28L3C	180	10	18	180	0	18		1249686-P28L3C	180	10	18	180	0	18
	1081821-P7R3C	241	8	30.125	241	0	30.125		1081821-P7R3C	241	8	30.125	241	0	30.125		1081821-P14L2C	124	8	15.5	124	0	15.5		1081821-P14L2C	124	8	15.5	124	0	15.5		1249686-P28L4C	153	9	17	153	0	17		1249686-P28L4C	153	9	17	153	0	17
																	1081821-P14L3C	151	8	18.875	151	0	18.875		1081821-P14L3C	151	8	18.875	151	0	18.875
																	1221818-P14L1C	146	8	18.25	146	0	18.25		1221818-P14L1C	146	8	18.25	146	0	18.25
																	1221818-P14L2C	142	8	17.75	142	0	17.75		1221818-P14L2C	142	8	17.75	142	0	17.75
																	1221818-P14L3C	158	8	19.75	158	0	19.75		1221818-P14L3C	158	8	19.75	158	0	19.75
																	1221818-P14L4C	151	8	18.875	151	0	18.875		1221818-P14L4C	151	8	18.875	151	0	18.875
	Total Average	291.25	8.5	34.2361	290.75	0.5	34.1806		Total Average	291.25	8.5	34.2361	290.75	0.5	34.1806		Total Average	148.556	8	18.5694	148.556	0	18.5694		Total Average	148.556	8	18.5694	148.556	0	18.5694		Total Average	170.75	9.25	18.4722	170.75	0	18.4722		Total Average	170.75	9.25	18.4722	170.75	0	18.4722
	Total StDev	34.1016	0.57735	3.0129	33.6885	1	3.00161		Total StDev	34.1016	0.57735	3.0129	33.6885	1	3.00161		Total StDev	10.5132	0	1.31415	10.5132	0	1.31415		Total StDev	10.5132	0	1.31415	10.5132	0	1.31415		Total StDev	13.351	0.5	1.35287	13.351	0	1.35287		Total StDev	13.351	0.5	1.35287	13.351	0	1.35287
	Total StErr	17.0508	0.288675	1.50645	16.8443	0.5	1.5008		Total StErr	17.0508	0.288675	1.50645	16.8443	0.5	1.5008		Total StErr	3.50441	0	0.438051	3.50441	0	0.438051		Total StErr	3.50441	0	0.438051	3.50441	0	0.438051		Total StErr	6.67551	0.25	0.676433	6.67551	0	0.676433		Total StErr	6.67551	0.25	0.676433	6.67551	0	0.676433
	Total n	4	4	4	4	4	4		Total n	4	4	4	4	4	4		Total n	9	9	9	9	9	9		Total n	9	9	9	9	9	9		Total n	4	4	4	4	4	4		Total n	4	4	4	4	4	4
	Tmc-/+								Tmc+/-								Tmc-/+								Tmc+/-								Tmc-/+								Tmc+/-
	1221945-P7R1C	339	9	37.6667	339	0	37.6667		1249506-P710R	339	9	37.6667	339	0	37.6667		1249691-P14L1C	147	9	16.3333	147	0	16.3333		1249506-L1C	180	9	20	179	1	19.8889		1249510-L1C	95	10	9.5	92	3	9.2		1249509-L1C	173	9	19.2222	173	0	19.2222
	1221945-P7R2C	342	9	38	342	0	38		1249506-P780L	305	9	33.8889	305	0	33.8889		1249691-P14L2C	159	9	17.6667	159	0	17.6667		1249506-L2C	168	9	18.6667	168	0	18.6667		1249510-L2C	131	10	13.1	116	15	11.6		1221934-L1C	165	9	18.3333	165	0	18.3333
	1221945-P7R3C	353	9	39.2222	352	1	39.1111		1249506-P7110L	340	9	37.7778	340	0	37.7778		1249691-P14L3C	152	9	16.8889	151	1	16.7778		1249506-L3C	180	10	18	180	0	18		1249510-L3C	96	9	10.6667	96	0	10.6667		1249533-L1C-8	216	11	19.6364	216	0	19.6364
	1249656-P7R2C	351	9	39	351	0	39		1249506-P71080L	358	9	39.7778	358	0	39.7778		1249691-P14L4C	144	9	16	143	1	15.8889		1249506-L4C	175	9	19.4444	175	0	19.4444		1249510-L4C	119	10	11.9	116	3	11.6		1249533-L1C-80	237	11	21.5455	227	10	20.6364
																									1249506-L5C	178	9	19.7778	176	2	19.5556
	Total Average	346.25	9	38.4722	346	0.25	38.4444		Total Average	335.5	9	37.2778	335.5	0	37.2778		Total Average	150.5	9	16.7222	150	0.5	16.6667		Total Average	176.2	9.2	19.1778	175.6	0.6	19.1111		Total Average	110.25	9.75	11.2917	105	5.25	10.7667		Total Average	197.75	10	19.6843	195.25	2.5	19.4571
	Total StDev	6.80074	0	0.755637	6.48074	0.5	0.720082		Total StDev	22.1284	0	2.45871	22.1284	0	2.45871		Total StDev	6.55744	0	0.728604	6.8313	0.57735	0.759033		Total StDev	5.01996	0.447214	0.829993	4.72229	0.894427	0.76578		Total StDev	17.7271	0.5	1.55358	12.8062	6.65207	1.13333		Total StDev	34.442	1.1547	1.3546	30.8153	5	0.955827
	Total StErr	3.40037	0	0.377819	3.24037	0.25	0.360041		Total StErr	11.0642	0	1.22936	11.0642	0	1.22936		Total StErr	3.27872	0	0.364302	3.41565	0.288675	0.379517		Total StErr	2.24499	0.2	0.371184	2.11187	0.4	0.342467		Total StErr	8.86355	0.25	0.77679	6.40312	3.32603	0.566667		Total StErr	17.221	0.57735	0.6773	15.4077	2.5	0.477914
	Total n	4	4	4	4	4	4		Total n	4	4	4	4	4	4		Total n	4	4	4	4	4	4		Total n	5	5	5	5	5	5		Total n	4	4	4	4	4	4		Total n	4	4	4	4	4	4
