# Supplementary material for: Sensory transduction is required for normal development and maturation of cochlear inner hair cell synapses
Source: eLife journal article supplement (doi:10.7554/elife.69433), 2021-11-04
Supplement: supp [file elife-69433-supp-v1.zip › elife_poa_e69433_Figure_4_source_data_1.xlsx]

## Sheet: Fig 4A-B WT vs. Tmc dKO
	Synapse Counts P7								Synapse Counts P28
	8.0kHz								8.0kHz
		Ribbons	IHCs	Ribbon:IHC Ratio	Ribbons w/ Terminals	Ribbons w/o Terminals	Synapse:IHC Ratio			Ribbons	IHCs	Ribbon:IHC Ratio	Ribbons w/ Terminals	Ribbons w/o Terminals	Synapse:IHC Ratio
	Control								Control
	1081821-P7L1C	312	8	39	312	0	39		1249686-P28L1C	152	10	15.2	152	0	15.2
	1081821-P7L2C	282	8	35.25	282	0	35.25		1249686-P28L2C	141	9	15.6667	141	0	15.6667
	1081821-P7L4C	309	8	38.625	309	0	38.625		1249686-P28L3C	150	9	16.6667	150	0	16.6667
	1081821-P7R3C	303	8	37.875	303	0	37.875		1249686-P28L4C	140	9	15.5556	140	0	15.5556
	Total Average	301.5	8	37.6875	301.5	0	37.6875		Total Average	145.75	9.25	15.7722	145.75	0	15.7722
	Total StDev	13.5277	0	1.69097	13.5277	0	1.69097		Total StDev	6.13052	0.5	0.628638	6.13052	0	0.628638
	Total StErr	6.76387	0	0.845484	6.76387	0	0.845484		Total StErr	3.06526	0.25	0.314319	3.06526	0	0.314319
	Total n	4	4	4	4	4	4		Total n	4	4	4	4	4	4
	Tmc-/-								Tmc-/-
	1087045-P7R1C	412	7	58.8571	412	0	58.8571		1087603-P28L1C	107	9	11.8889	11	96	10.6667
	1087045-P7R2C	411	7	58.7143	410	1	58.5714		1087603-P28L2C	95	10	9.5	9	86	8.6
	1087045-P7R3C	375	7	53.5714	375	0	53.5714		1087603-P28L3C	149	11	13.5455	11	138	12.5455
	1087045-P7L1C	389	7	55.5714	389	0	55.5714		1249700-P28L1C	112	9	12.4444	1	111	12.3333
	1087045-P7L2C	329	7	47	329	0	47		1249700-P28L2C	126	10	12.6	2	124	12.4
	1131715-P7L1C	449	7	64.1429	449	0	64.1429
	1131715-P7L2C	414	7	59.1429	414	0	59.1429
	1087603-P7L1C	506	9	56.2222	506	0	56.2222
	1087603-P7L2C	420	8	52.5	420	0	52.5
	1087603-P7L3C	414	8	51.75	414	0	51.75
	1087603-P7L4C	429	8	53.625	429	0	53.625
	1087603-P7R3C	434	9	48.2222	434	0	48.2222
	Total Average	415.167	7.58333	54.9433	415.083	0.0833333	54.9314		Total Average	117.8	9.8	11.9958	6.8	111	11.3091
	Total StDev	42.3381	0.792961	4.87939	42.348	0.288675	4.86951		Total StDev	20.6809	0.83666	1.51725	4.91935	20.9045	1.69703
	Total StErr	12.222	0.228908	1.40856	12.2248	0.0833333	1.40571		Total StErr	9.24878	0.374166	0.678536	2.2	9.3488	0.758935
	Total n	12	12	12	12	12	12		Total n	5	5	5	5	5	5
	Synapse Counts P7								Synapse Counts P28
	11.3kHz								11.3kHz
		Ribbons	IHCs	Ribbon:IHC Ratio	Ribbons w/ Terminals	Ribbons w/o Terminals	Synapse:IHC Ratio			Ribbons	IHCs	Ribbon:IHC Ratio	Ribbons w/ Terminals	Ribbons w/o Terminals	Synapse:IHC Ratio
	Control								Control
	1081821-P7L1C	277	8	34.625	276	1	34.5		1249686-P28L1C	152	10	15.2	152	0	15.2
	1081821-P7L2C	311	8	38.875	310	1	38.75		1249686-P28L2C	149	9	16.5556	148	1	16.4444
	1081821-P7L4C	411	10	41.1	409	2	40.9		1249686-P28L3C	168	9	18.6667	168	0	18.6667
	1081821-P7R3C	304	8	38	303	1	37.875		1249686-P28L4C	164	10	16.4	164		16.4
	Total Average	325.75	8.5	38.15	324.5	1.25	38.0063		Total Average	158.25	9.5	16.7056	158	0.333333	16.6778
	Total StDev	58.6934	1	2.68801	58.2094	0.5	2.6607		Total StDev	9.17878	0.57735	1.44089	9.5219	0.57735	1.44581
	Total StErr	29.3467	0.5	1.34401	29.1047	0.25	1.33035		Total StErr	4.58939	0.288675	0.720447	4.76095	0.333333	0.722906
	Total n	4	4	4	4	4	4		Total n	4	4	4	4	3	4
	Tmc-/-								Tmc-/-
	1087045-P7R1C	393	7	56.1429	393	0	56.1429		1087603-P28L1C	127	9	14.1111	20	107	11.8889
	1087045-P7R2C	386	7	55.1429	386	0	55.1429		1087603-P28L2C	145	12	12.0833	7	138	11.5
	1087045-P7R3C	392	6	65.3333	391	1	65.1667		1087603-P28L3C	129	10	12.9	5	124	12.4
	1087045-P7L1C	381	7	54.4286	381	0	54.4286		1249700-P28L1C	111	9	12.3333	2	109	12.1111
	1087045-P7L2C	315	7	45	315	0	45		1249700-P28L2C	135	9	15	1	134	14.8889
	1131715-P7L1C	553	9	61.4444	553	0	61.4444
	1131715-P7L2C	422	7	60.2857	421	1	60.1429
	1087603-P7L1C	427	8	53.375	427	0	53.375
	1087603-P7L2C	430	8	53.75	430	0	53.75
	1087603-P7L3C	476	9	52.8889	476	0	52.8889
	1087603-P7L4C	414	8	51.75	413	1	51.625
	1087603-P7R3C	438	8	54.75	438	0	54.75
	Total Average	418.917	7.58333	55.3576	418.667	0.25	55.3214		Total Average	129.4	9.8	13.2856	7	122.4	12.5578
	Total StDev	57.6344	0.900337	5.18433	57.6815	0.452267	5.15106		Total StDev	12.4419	1.30384	1.23709	7.64853	14.1174	1.34395
	Total StErr	16.6376	0.259905	1.49659	16.6512	0.130558	1.48698		Total StErr	5.56417	0.583095	0.553244	3.42053	6.31348	0.601032
	Total n	12	12	12	12	12	12		Total n	5	5	5	5	5	5
	Synapse Counts P7								Synapse Counts P28
	16.0kHz								16.0kHz
		Ribbons	IHCs	Ribbon:IHC Ratio	Ribbons w/ Terminals	Ribbons w/o Terminals	Synapse:IHC Ratio			Ribbons	IHCs	Ribbon:IHC Ratio	Ribbons w/ Terminals	Ribbons w/o Terminals	Synapse:IHC Ratio
	Control								Control
	1081821-P7L1C	334	8	41.75	332	2	41.5		1249686-P28L1C	192	10	19.2	192	0	19.2
	1081821-P7L2C	318	8	39.75	318	0	39.75		1249686-P28L2C	169	9	18.7778	169	0	18.7778
	1081821-P7L4C	362	9	40.2222	361	1	40.1111		1249686-P28L3C	194	10	19.4	194	0	19.4
	1081821-P7R3C	314	8	39.25	312	2	39		1249686-P28L4C	170	10	17	170	0	17
	Total Average	332	8.25	40.2431	330.75	1.25	40.0903		Total Average	181.25	9.75	18.5944	181.25	0	18.5944
	Total StDev	21.7868	0.5	1.08021	21.8384	0.957427	1.04758		Total StDev	13.5984	0.5	1.09415	13.5984	0	1.09415
	Total StErr	10.8934	0.25	0.540106	10.9192	0.478714	0.523788		Total StErr	6.7992	0.25	0.547074	6.7992	0	0.547074
	Total n	4	4	4	4	4	4		Total n	4	4	4	4	4	4
	Tmc-/-								Tmc-/-
	1087045-P7R1C	406	7	58	405	1	57.8571		1087603-P28L1C	128	9	14.2222	18	110	12.2222
	1087045-P7R2C	460	8	57.5	460	0	57.5		1087603-P28L2C	99	9	11	4	95	10.5556
	1087045-P7R3C	548	9	60.8889	548	0	60.8889		1087603-P28L3C	148	10	14.8	9	139	13.9
	1087045-P7L1C	356	7	50.8571	354	2	50.5714		1249700-P28L1C	106	9	11.7778	0	106	11.7778
	1087045-P7L2C	302	7	43.1429	301	1	43		1249700-P28L2C	104	9	11.5556	1	103	11.4444
	1131715-P7L1C	434	7	62	434	0	62
	1131715-P7L2C	422	7	60.2857	422	0	60.2857
	1087603-P7L1C	487	9	54.1111	487	0	54.1111
	1087603-P7L2C
	1087603-P7L3C	473	9	52.5556	469	4	52.1111
	1087603-P7L4C	423	8	52.875	422	1	52.75
	1087603-P7R3C	451	8	56.375	451	0	56.375
	Total Average	432.909	7.81818	55.3265	432.091	0.818182	55.2228		Total Average	117	9.2	12.6711	6.4	110.6	11.98
	Total StDev	65.4484	0.873863	5.4463	65.7061	1.25045	5.52437		Total StDev	20.5913	0.447214	1.71561	7.36885	16.8018	1.23509
	Total StErr	19.7334	0.26348	1.64212	19.8111	0.377026	1.66566		Total StErr	9.20869	0.2	0.767243	3.29545	7.51399	0.552351
	Total n	11	11	11	11	11	11		Total n	5	5	5	5	5	5
	Synapse Counts P7								Synapse Counts P28
	22.6kHz								22.6kHz
		Ribbons	IHCs	Ribbon:IHC Ratio	Ribbons w/ Terminals	Ribbons w/o Terminals	Synapse:IHC Ratio			Ribbons	IHCs	Ribbon:IHC Ratio	Ribbons w/ Terminals	Ribbons w/o Terminals	Synapse:IHC Ratio
	Control								Control
	1081821-P7L1C	323	8	40.375	323	0	40.375		1249686-P28L1C	187	10	18.7	187	0	18.7
	1081821-P7L2C	333	8	41.625	333	0	41.625		1249686-P28L2C	192	10	19.2	192	0	19.2
	1081821-P7L4C	289	8	36.125	289	0	36.125		1249686-P28L3C	217	11	19.7273	217	0	19.7273
	1081821-P7R3C	282	8	35.25	282	0	35.25		1249686-P28L4C	191	11	17.3636	191	0	17.3636
	Total Average	306.75	8	38.3438	306.75	0	38.3438		Total Average	196.75	10.5	18.7477	196.75	0	18.7477
	Total StDev	25.0383	0	3.12979	25.0383	0	3.12979		Total StDev	13.6717	0.57735	1.01358	13.6717	0	1.01358
	Total StErr	12.5192	0	1.56489	12.5192	0	1.56489		Total StErr	6.83587	0.288675	0.506791	6.83587	0	0.506791
	Total n	4	4	4	4	4	4		Total n	4	4	4	4	4	4
	Tmc-/-								Tmc-/-
	1087045-P7R1C	407	7	58.1429	407	0	58.1429		1087603-P28L1C	108	9	12	9	99	11
	1087045-P7R2C	346	7	49.4286	346	0	49.4286		1087603-P28L2C	96	10	9.6	5	91	9.1
	1087045-P7R3C	375	7	53.5714	375	0	53.5714		1087603-P28L3C	104	9	11.5556	9	95	10.5556
	1087045-P7L1C	319	7	45.5714	318	1	45.4286		1249700-P28L1C	78	9	8.66667	0	78	8.66667
	1087045-P7L2C	384	7	54.8571	383	1	54.7143		1249700-P28L2C	102	9	11.3333	2	100	11.1111
	1131715-P7L1C	438	7	62.5714	438	0	62.5714
	1131715-P7L2C	439	7	62.7143	439	0	62.7143
	1087603-P7L1C	510	10	51	510	0	51
	1087603-P7L2C	398	8	49.75	398	0	49.75
	1087603-P7L3C	459	9	51	457	2	50.7778
	1087603-P7L4C	451	8	56.375	451	0	56.375
	1087603-P7R3C	393	8	49.125	389	4	48.625
	Total Average	409.917	7.66667	53.6756	409.25	0.666667	53.5916		Total Average	97.6	9.2	10.6311	5	92.6	10.0867
	Total StDev	52.5936	0.984732	5.42414	52.7569	1.23091	5.49055		Total StDev	11.7813	0.447214	1.42687	4.06202	8.90505	1.12843
	Total StErr	15.1825	0.284268	1.56581	15.2296	0.355335	1.58499		Total StErr	5.26878	0.2	0.638115	1.81659	3.98246	0.50465
	Total n	12	12	12	12	12	12		Total n	5	5	5	5	5	5
	Synapse Counts P7								Synapse Counts P28
	32.0kHz								32.0kHz
		Ribbons	IHCs	Ribbon:IHC Ratio	Ribbons w/ Terminals	Ribbons w/o Terminals	Synapse:IHC Ratio			Ribbons	IHCs	Ribbon:IHC Ratio	Ribbons w/ Terminals	Ribbons w/o Terminals	Synapse:IHC Ratio
	Control								Control
	1081821-P7L1C	312	9	34.6667	312	0	34.6667		1249686-P28L1C	168	9	18.6667	168	0	18.6667
	1081821-P7L2C	299	8	37.375	299	0	37.375		1249686-P28L2C	182	9	20.2222	182	0	20.2222
	1081821-P7L4C	313	9	34.7778	311	2	34.5556		1249686-P28L3C	180	10	18	180	0	18
	1081821-P7R3C	241	8	30.125	241	0	30.125		1249686-P28L4C	153	9	17	153	0	17
	Total Average	291.25	8.5	34.2361	290.75	0.5	34.1806		Total Average	170.75	9.25	18.4722	170.75	0	18.4722
	Total StDev	34.1016	0.57735	3.0129	33.6885	1	3.00161		Total StDev	13.351	0.5	1.35287	13.351	0	1.35287
	Total StErr	17.0508	0.288675	1.50645	16.8443	0.5	1.5008		Total StErr	6.67551	0.25	0.676433	6.67551	0	0.676433
	Total n	4	4	4	4	4	4		Total n	4	4	4	4	4	4
	Tmc-/-								Tmc-/-
	1087045-P7R1C	393	7	56.1429	393	0	56.1429		1087603-P28L1C	73	10	7.3	4	69	6.9
	1087045-P7R2C	310	7	44.2857	310	0	44.2857		1087603-P28L2C	90	9	10	9	81	9
	1087045-P7R3C	378	7	54	378	0	54		1087603-P28L3C	91	10	9.1	10	81	8.1
	1087045-P7L1C								1249700-P28L1C	85	10	8.5	1	84	8.4
	1087045-P7L2C	385	7	55	385	0	55		1249700-P28L2C	88	10	8.8	1	87	8.7
	1131715-P7L1C	365	7	52.1429	365	0	52.1429
	1131715-P7L2C	366	7	52.2857	366	0	52.2857
	1087603-P7L1C	343	8	42.875	343	0	42.875
	1087603-P7L2C	395	8	49.375	394	1	49.25
	1087603-P7L3C	345	8	43.125	345	0	43.125
	1087603-P7L4C	438	9	48.6667	438	0	48.6667
	1087603-P7R3C	364	8	45.5	358	6	44.75
	Total Average	371.091	7.54545	49.3999	370.455	0.636364	49.3203		Total Average	85.4	9.8	8.74	5	80.4	8.22
	Total StDev	33.294	0.687552	4.87537	33.3987	1.80404	4.94021		Total StDev	7.30068	0.447214	0.981326	4.30116	6.84105	0.810555
	Total StErr	10.0385	0.207305	1.46998	10.0701	0.543937	1.48953		Total StErr	3.26497	0.2	0.438862	1.92354	3.05941	0.362491
	Total n	11	11	11	11	11	11		Total n	5	5	5	5	5	5

## Sheet: Fig. 4A-4B TMIE
	Synapse Counts P7									Synapse Counts P28
	8.0kHz									8.0kHz
		Ribbons	IHCs	Ribbon:IHC Ratio	Ribbons w/ Terminals	Ribbons w/o Terminals	Synapse:IHC Ratio				Ribbons	IHCs	Ribbon:IHC Ratio	Ribbons w/ Terminals	Ribbons w/o Terminals	Synapse:IHC Ratio
	Control									Control
	1081821-P7L1C	312	8	39	312	0	39			1249686-P28L1C	152	10	15.2	152	0	15.2
	1081821-P7L2C	282	8	35.25	282	0	35.25			1249686-P28L2C	141	9	15.6667	141	0	15.6667
	1081821-P7L4C	309	8	38.625	309	0	38.625			1249686-P28L3C	150	9	16.6667	150	0	16.6667
	1081821-P7R3C	303	8	37.875	303	0	37.875			1249686-P28L4C	140	9	15.5556	140	0	15.5556
	Total Average	301.5	8	37.6875	301.5	0	37.6875			Total Average	145.75	9.25	15.7722	145.75	0	15.7722
	Total StDev	13.5277	0	1.69097	13.5277	0	1.69097			Total StDev	6.13052	0.5	0.628638	6.13052	0	0.628638
	Total StErr	6.76387	0	0.845484	6.76387	0	0.845484			Total StErr	3.06526	0.25	0.314319	3.06526	0	0.314319
	Total n	4	4	4	4	4	4			Total n	4	4	4	4	4	4
	TMIE									TMIE
	1391893-10R	473	10	47.3	473	0	47.3			1391720-F1	161	11	14.6364	158	3	14.3636
	1391893-80L	576	11	52.3636	576	0	52.3636			1392026-8	178	11	16.1818	163	15	14.8182
	1391712-80L	590	11	53.6364	587	3	53.3636			1392026-18	156	10	15.6	154	2	15.4
	1391712-810L	522	10	52.2	521	1	52.1			1391894-L	111	10	11.1	110	1	11
	1391712-880R	501	10	50.1	501	0	50.1			1391894-R	130	9	14.4444	127	3	14.1111
										1391894-RL	158	11	14.3636	152	6	13.8182
	Average	532.4	10.4	51.12	531.6	0.8	51.0455			Average	149	10.3333	14.3877	144	5	13.9185
	StDev	49.6014	0.547723	2.48384	48.7934	1.30384	2.40551			StDev	24.1661	0.816497	1.76426	20.8135	5.17687	1.53409
	StErr	22.1824	0.244949	1.11081	21.8211	0.583095	1.07578			StErr	9.86577	0.333333	0.720258	8.49706	2.11345	0.626291
	n	5	5	5	5	5	5			n	6	6	6	6	6	6
	Synapse Counts P7									Synapse Counts P28
	11.3kHz									11.3kHz
		Ribbons	IHCs	Ribbon:IHC Ratio	Ribbons w/ Terminals	Ribbons w/o Terminals	Synapse:IHC Ratio				Ribbons	IHCs	Ribbon:IHC Ratio	Ribbons w/ Terminals	Ribbons w/o Terminals	Synapse:IHC Ratio
	Control									Control
	1081821-P7L1C	277	8	34.625	276	1	34.5			1249686-P28L1C	152	10	15.2	152	0	15.2
	1081821-P7L2C	311	8	38.875	310	1	38.75			1249686-P28L2C	149	9	16.5556	148	1	16.4444
	1081821-P7L4C	411	10	41.1	409	2	40.9			1249686-P28L3C	168	9	18.6667	168	0	18.6667
	1081821-P7R3C	304	8	38	303	1	37.875			1249686-P28L4C	164	10	16.4	164		16.4
	Average	325.75	8.5	38.15	324.5	1.25	38.0063			Average	158.25	9.5	16.7056	158	0.333333	16.6778
	StDev	58.6934	1	2.68801	58.2094	0.5	2.6607			StDev	9.17878	0.57735	1.44089	9.5219	0.57735	1.44581
	StErr	29.3467	0.5	1.34401	29.1047	0.25	1.33035			StErr	4.58939	0.288675	0.720447	4.76095	0.333333	0.722906
	n	4	4	4	4	4	4			n	4	4	4	4	3	4
	TMIE									TMIE
	1391893-10R	630	11	57.2727	630	0	57.2727			1391720-F1	170	12	14.1667	168	2	14
	1391893-80L	481	9	53.4444	479	2	53.2222			1392026-8	191	11	17.3636	184	7	16.7273
	1391712-80L	516	10	51.6	515	1	51.5			1392026-18	152	10	15.2	147	5	14.7
	1391712-810L	500	10	50	500	0	50			1391894-L	176	13	13.5385	173	3	13.3077
	1391712-880R	555	11	50.4545	555	0	50.4545			1391894-R	150	10	15	144	6	14.4
										1391894-RL	157	11	14.2727	152	5	13.8182
	Average	536.4	10.2	52.5543	535.8	0.6	52.4899			Average	166	11.1667	14.9236	161.333	4.66667	14.4922
	StDev	58.9856	0.83666	2.95381	59.5458	0.894427	2.94677			StDev	15.9625	1.16905	1.338	16.0458	1.8619	1.19556
	StErr	26.3792	0.374166	1.32098	26.6297	0.4	1.31784			StErr	6.51665	0.477261	0.546236	6.55066	0.760117	0.488086
	n	5	5	5	5	5	5			n	6	6	6	6	6	6
	Synapse Counts P7									Synapse Counts P28
	16.0kHz									16.0kHz
		Ribbons	IHCs	Ribbon:IHC Ratio	Ribbons w/ Terminals	Ribbons w/o Terminals	Synapse:IHC Ratio				Ribbons	IHCs	Ribbon:IHC Ratio	Ribbons w/ Terminals	Ribbons w/o Terminals	Synapse:IHC Ratio
	Control									Control
	1081821-P7L1C	334	8	41.75	332	2	41.5			1249686-P28L1C	192	10	19.2	192	0	19.2
	1081821-P7L2C	318	8	39.75	318	0	39.75			1249686-P28L2C	169	9	18.7778	169	0	18.7778
	1081821-P7L4C	362	9	40.2222	361	1	40.1111			1249686-P28L3C	194	10	19.4	194	0	19.4
	1081821-P7R3C	314	8	39.25	312	2	39			1249686-P28L4C	170	10	17	170	0	17
	Total Average	332	8.25	40.2431	330.75	1.25	40.0903			Total Average	181.25	9.75	18.5944	181.25	0	18.5944
	Total StDev	21.7868	0.5	1.08021	21.8384	0.957427	1.04758			Total StDev	13.5984	0.5	1.09415	13.5984	0	1.09415
	Total StErr	10.8934	0.25	0.540106	10.9192	0.478714	0.523788			Total StErr	6.7992	0.25	0.547074	6.7992	0	0.547074
	Total n	4	4	4	4	4	4			Total n	4	4	4	4	4	4
	TMIE									TMIE
	1391893-10R	527	10	52.7	527	0	52.7			1391720-F1	149	11	13.5455	147	2	13.3636
	1391893-80L	557	10	55.7	557	0	55.7			1392026-8	164	11	14.9091	163	1	14.8182
	1391712-80L	501	10	50.1	501	0	50.1			1392026-18	190	10	19	186	4	18.6
	1391712-810L	488	10	48.8	488	0	48.8			1391894-L	164	13	12.6154	160	4	12.3077
	1391712-880R	484	10	48.4	484	0	48.4			1391894-R	162	12	13.5	155	7	12.9167
										1391894-RL	134	11	12.1818	132	2	12
	Average	511.4	10	51.14	511.4	0	51.14			Average	160.5	11.3333	14.292	157.167	3.33333	14.001
	StDev	30.5336	0	3.05336	30.5336	0	3.05336			StDev	18.6091	1.0328	2.48976	17.9713	2.16025	2.46056
	StErr	13.655	0	1.3655	13.655	0	1.3655			StErr	7.59715	0.421637	1.01644	7.33674	0.881917	1.00452
	n	5	5	5	5	5	5			n	6	6	6	6	6	6
	Synapse Counts P7									Synapse Counts P28
	22.6kHz									22.6kHz
		Ribbons	IHCs	Ribbon:IHC Ratio	Ribbons w/ Terminals	Ribbons w/o Terminals	Synapse:IHC Ratio				Ribbons	IHCs	Ribbon:IHC Ratio	Ribbons w/ Terminals	Ribbons w/o Terminals	Synapse:IHC Ratio
	Control									Control
	1081821-P7L1C	323	8	40.375	323	0	40.375			1249686-P28L1C	187	10	18.7	187	0	18.7
	1081821-P7L2C	333	8	41.625	333	0	41.625			1249686-P28L2C	192	10	19.2	192	0	19.2
	1081821-P7L4C	289	8	36.125	289	0	36.125			1249686-P28L3C	217	11	19.7273	217	0	19.7273
	1081821-P7R3C	282	8	35.25	282	0	35.25			1249686-P28L4C	191	11	17.3636	191	0	17.3636
	Total Average	306.75	8	38.3438	306.75	0	38.3438			Total Average	196.75	10.5	18.7477	196.75	0	18.7477
	Total StDev	25.0383	0	3.12979	25.0383	0	3.12979			Total StDev	13.6717	0.57735	1.01358	13.6717	0	1.01358
	Total StErr	12.5192	0	1.56489	12.5192	0	1.56489			Total StErr	6.83587	0.288675	0.506791	6.83587	0	0.506791
	Total n	4	4	4	4	4	4			Total n	4	4	4	4	4	4
	TMIE									TMIE
	1391893-10R	501	10	50.1	501	0	50.1			1391720-F1	147	12	12.25	143	4	11.9167
	1391893-80L	611	10	61.1	610	1	61			1392026-8	147	12	12.25	142	5	11.8333
	1391712-80L	562	10	56.2	558	4	55.8			1392026-18	143	11	13	141	2	12.8182
	1391712-810L	548	10	54.8	548	0	54.8			1391894-L	137	11	12.4545	132	5	12
	1391712-880R	574	11	52.1818	573	1	52.0909			1391894-R	124	10	12.4	110	14	11
										1391894-RL	163	13	12.5385	155	8	11.9231
	Average	559.2	10.2	54.8764	558	1.2	54.7582			Average	143.5	11.5	12.4822	137.167	6.33333	11.9152
	StDev	40.0712	0.447214	4.20017	39.6169	1.64317	4.14911			StDev	12.8647	1.04881	0.278078	15.1976	4.2269	0.577395
	StErr	17.9204	0.2	1.87837	17.7172	0.734847	1.85554			StErr	5.25198	0.428174	0.113525	6.20439	1.72562	0.23572
	n	5	5	5	5	5	5			n	6	6	6	6	6	6
	Synapse Counts P7									Synapse Counts P28
	32.0kHz									32.0kHz
		Ribbons	IHCs	Ribbon:IHC Ratio	Ribbons w/ Terminals	Ribbons w/o Terminals	Synapse:IHC Ratio				Ribbons	IHCs	Ribbon:IHC Ratio	Ribbons w/ Terminals	Ribbons w/o Terminals	Synapse:IHC Ratio
	Control									Control
	1081821-P7L1C	312	9	34.6667	312	0	34.6667			1249686-P28L1C	168	9	18.6667	168	0	18.6667
	1081821-P7L2C	299	8	37.375	299	0	37.375			1249686-P28L2C	182	9	20.2222	182	0	20.2222
	1081821-P7L4C	313	9	34.7778	311	2	34.5556			1249686-P28L3C	180	10	18	180	0	18
	1081821-P7R3C	241	8	30.125	241	0	30.125			1249686-P28L4C	153	9	17	153	0	17
	Total Average	291.25	8.5	34.2361	290.75	0.5	34.1806			Total Average	170.75	9.25	18.4722	170.75	0	18.4722
	Total StDev	34.1016	0.57735	3.0129	33.6885	1	3.00161			Total StDev	13.351	0.5	1.35287	13.351	0	1.35287
	Total StErr	17.0508	0.288675	1.50645	16.8443	0.5	1.5008			Total StErr	6.67551	0.25	0.676433	6.67551	0	0.676433
	Total n	4	4	4	4	4	4			Total n	4	4	4	4	4	4
	TMIE									TMIE
	1391893-10R	524	11	47.6364	523	1	47.5455			1391720-F1	175	13	13.4615	173	2	13.3077
	1391893-80L	574	11	52.1818	574	0	52.1818			1392026-8	104	11	9.45455	103	1	9.36364
	1391712-80L	454	11	41.2727	454	0	41.2727			1392026-18	139	12	11.5833	136	3	11.3333
	1391712-810L	542	11	49.2727	542	0	49.2727			1391894-L	71	10	7.1	70	1	7
	1391712-880R	546	11	49.6364	546	0	49.6364			1391894-R	135	12	11.25	131	4	10.9167
										1391894-RL	136	12	11.3333	133	3	11.0833
	Average	528	11	48	527.8	0.2	47.9818			Average	126.667	11.6667	10.6971	124.333	2.33333	10.5008
	StDev	45.0777	0	4.09797	45.1021	0.447214	4.10019			StDev	35.3761	1.0328	2.17353	34.7313	1.21106	2.12757
	StErr	20.1594	0	1.83267	20.1703	0.2	1.83366			StErr	14.4422	0.421637	0.887339	14.179	0.494413	0.868577
	n	5	5	5	5	5	5			n	6	6	6	6	6	6

## Sheet: Fig. 4C Tmc1 KO vs WT
				Tmc1 KO
	Synapse Counts P28
	8.0kHz
		Ribbons	IHCs	Ribbon:IHC Ratio	Ribbons w/ Terminals	Ribbons w/o Terminals	Synapse:IHC Ratio
	Control
	1249686-P28L1C	152	10	15.2	152	0	15.2
	1249686-P28L2C	141	9	15.6667	141	0	15.6667
	1249686-P28L3C	150	9	16.6667	150	0	16.6667
	1249686-P28L4C	140	9	15.5556	140	0	15.5556
	Total Average	145.75	9.25	15.7722	145.75	0	15.7722
	Total StDev	6.13052	0.5	0.628638	6.13052	0	0.628638
	Total StErr	3.06526	0.25	0.314319	3.06526	0	0.314319
	Total n	4	4	4	4	4	4
	Tmc-/+
	1249510-L1C	127	9	14.1111	119	8	13.2222
	1249510-L2C	101	9	11.2222	100	1	11.1111
	1249510-L3C	89	9	9.88889	89	0	9.88889
	1249510-L4C	142	11	12.9091	137	5	12.4545
	Total Average	114.75	9.5	12.0328	111.25	3.5	11.6692
	Total StDev	24.116	1	1.85658	21.1719	3.69685	1.47305
	Total StErr	12.058	0.5	0.928289	10.586	1.84842	0.736524
	Total n	4	4	4	4	4	4
	Synapse Counts P28
	11.3kHz
		Ribbons	IHCs	Ribbon:IHC Ratio	Ribbons w/ Terminals	Ribbons w/o Terminals	Synapse:IHC Ratio
	Control
	1249686-P28L1C	152	10	15.2	152	0	15.2
	1249686-P28L2C	149	9	16.5556	148	1	16.4444
	1249686-P28L3C	168	9	18.6667	168	0	18.6667
	1249686-P28L4C	164	10	16.4	164		16.4
	Total Average	158.25	9.5	16.7056	158	0.333333	16.6778
	Total StDev	9.17878	0.57735	1.44089	9.5219	0.57735	1.44581
	Total StErr	4.58939	0.288675	0.720447	4.76095	0.333333	0.722906
	Total n	4	4	4	4	3	4
	Tmc-/+
	1249510-L1C	119	9	13.2222	114	5	12.6667
	1249510-L2C	110	10	11	110	0	11
	1249510-L3C	88	8	11	87	1	10.875
	1249510-L4C	95	9	10.5556	95	0	10.5556
	Total Average	103	9	11.4444	101.5	1.5	11.2743
	Total StDev	14.0712	0.816497	1.20356	12.6623	2.38048	0.946918
	Total StErr	7.03562	0.408248	0.601781	6.33114	1.19024	0.473459
	Total n	4	4	4	4	4	4
	Synapse Counts P28
	16.0kHz
		Ribbons	IHCs	Ribbon:IHC Ratio	Ribbons w/ Terminals	Ribbons w/o Terminals	Synapse:IHC Ratio
	Control
	1249686-P28L1C	192	10	19.2	192	0	19.2
	1249686-P28L2C	169	9	18.7778	169	0	18.7778
	1249686-P28L3C	194	10	19.4	194	0	19.4
	1249686-P28L4C	170	10	17	170	0	17
	Total Average	181.25	9.75	18.5944	181.25	0	18.5944
	Total StDev	13.5984	0.5	1.09415	13.5984	0	1.09415
	Total StErr	6.7992	0.25	0.547074	6.7992	0	0.547074
	Total n	4	4	4	4	4	4
	Tmc-/+
	1249510-L1C	117	10	11.7	116	1	11.6
	1249510-L2C	107	9	11.8889	105	2	11.6667
	1249510-L3C	103	10	10.3	102	1	10.2
	1249510-L4C	126	10	12.6	124	2	12.4
	Total Average	113.25	9.75	11.6222	111.75	1.5	11.4667
	Total StDev	10.3401	0.5	0.962892	10.1448	0.57735	0.918937
	Total StErr	5.17003	0.25	0.481446	5.07239	0.288675	0.459468
	Total n	4	4	4	4	4	4
	Synapse Counts P28
	22.6kHz
		Ribbons	IHCs	Ribbon:IHC Ratio	Ribbons w/ Terminals	Ribbons w/o Terminals	Synapse:IHC Ratio
	Control
	1249686-P28L1C	187	10	18.7	187	0	18.7
	1249686-P28L2C	192	10	19.2	192	0	19.2
	1249686-P28L3C	217	11	19.7273	217	0	19.7273
	1249686-P28L4C	191	11	17.3636	191	0	17.3636
	Total Average	196.75	10.5	18.7477	196.75	0	18.7477
	Total StDev	13.6717	0.57735	1.01358	13.6717	0	1.01358
	Total StErr	6.83587	0.288675	0.506791	6.83587	0	0.506791
	Total n	4	4	4	4	4	4
	Tmc-/+
	1249510-L1C	120	9	13.3333	115	5	12.7778
	1249510-L2C	113	10	11.3	111	2	11.1
	1249510-L3C	105	10	10.5	105	0	10.5
	1249510-L4C	117	10	11.7	114	3	11.4
	Total Average	113.75	9.75	11.7083	111.25	2.5	11.4444
	Total StDev	6.5	0.5	1.19269	4.5	2.08167	0.964429
	Total StErr	3.25	0.25	0.596343	2.25	1.04083	0.482215
	Total n	4	4	4	4	4	4
	Synapse Counts P28
	32.0kHz
		Ribbons	IHCs	Ribbon:IHC Ratio	Ribbons w/ Terminals	Ribbons w/o Terminals	Synapse:IHC Ratio
	Control
	1249686-P28L1C	168	9	18.6667	168	0	18.6667
	1249686-P28L2C	182	9	20.2222	182	0	20.2222
	1249686-P28L3C	180	10	18	180	0	18
	1249686-P28L4C	153	9	17	153	0	17
	Total Average	170.75	9.25	18.4722	170.75	0	18.4722
	Total StDev	13.351	0.5	1.35287	13.351	0	1.35287
	Total StErr	6.67551	0.25	0.676433	6.67551	0	0.676433
	Total n	4	4	4	4	4	4
	Tmc-/+
	1249510-L1C	95	10	9.5	92	3	9.2
	1249510-L2C	131	10	13.1	116	15	11.6
	1249510-L3C	96	9	10.6667	96	0	10.6667
	1249510-L4C	119	10	11.9	116	3	11.6
	Total Average	110.25	9.75	11.2917	105	5.25	10.7667
	Total StDev	17.7271	0.5	1.55358	12.8062	6.65207	1.13333
	Total StErr	8.86355	0.25	0.77679	6.40312	3.32603	0.566667
	Total n	4	4	4	4	4	4

## Sheet: Fig. 4C Bth
	Synapse Counts P28
	8.0kHz
		Ribbons	IHCs	Ribbon:IHC Ratio	Ribbons w/ Terminals	Ribbons w/o Terminals	Synapse:IHC Ratio
	Control
	1249686-P28L1C	152	10	15.2	152	0	15.2
	1249686-P28L2C	141	9	15.6667	141	0	15.6667
	1249686-P28L3C	150	9	16.6667	150	0	16.6667
	1249686-P28L4C	140	9	15.5556	140	0	15.5556
	Total Average	145.75	9.25	15.7722	145.75	0	15.7722
	Total StDev	6.13052	0.5	0.628638	6.13052	0	0.628638
	Total StErr	3.06526	0.25	0.314319	3.06526	0	0.314319
	Total n	4	4	4	4	4	4
	Bth-Bth
	1391473-F2	137	9	15.2222	137	0	15.2222
	1391473-M3	143	10	14.3	143	0	14.3
	1391473-M4	141	10	14.1	141	0	14.1
	1446655-M1	88	6	14.6667	88	0	14.6667
	1446655-M2	137	9	15.2222	137	0	15.2222
	1446655-M3	170	10	17	170	0	17
	Average	136	9	15.0852	136	0	15.0852
	StDev	26.5932	1.54919	1.04559	26.5932	0	1.04559
	StErr	10.8566	0.632456	0.426862	10.8566	0	0.426862
	n	6	6	6	6	6	6
	Synapse Counts P28
	11.3kHz
		Ribbons	IHCs	Ribbon:IHC Ratio	Ribbons w/ Terminals	Ribbons w/o Terminals	Synapse:IHC Ratio
	Control
	1249686-P28L1C	152	10	15.2	152	0	15.2
	1249686-P28L2C	149	9	16.5556	148	1	16.4444
	1249686-P28L3C	168	9	18.6667	168	0	18.6667
	1249686-P28L4C	164	10	16.4	164		16.4
	Average	158.25	9.5	16.7056	158	0.333333	16.6778
	StDev	9.17878	0.57735	1.44089	9.5219	0.57735	1.44581
	StErr	4.58939	0.288675	0.720447	4.76095	0.333333	0.722906
	n	4	4	4	4	3	4
	Bth-Bth
	1391473-F2	160	10	16	160	0	16
	1391473-M3	159	10	15.9	159	0	15.9
	1391473-M4	165	10	16.5	165	0	16.5
	1446655-M1	157	10	15.7	157	0	15.7
	1446655-M2	150	10	15	150	0	15
	1446655-M3	68	5	13.6	68	0	13.6
	Average	143.167	9.16667	15.45	143.167	0	15.45
	StDev	37.1452	2.04124	1.02908	37.1452	0	1.02908
	StErr	15.1645	0.833333	0.420119	15.1645	0	0.420119
	n	6	6	6	6	6	6
	Synapse Counts P28
	16.0kHz
		Ribbons	IHCs	Ribbon:IHC Ratio	Ribbons w/ Terminals	Ribbons w/o Terminals	Synapse:IHC Ratio
	Control
	1249686-P28L1C	192	10	19.2	192	0	19.2
	1249686-P28L2C	169	9	18.7778	169	0	18.7778
	1249686-P28L3C	194	10	19.4	194	0	19.4
	1249686-P28L4C	170	10	17	170	0	17
	Total Average	181.25	9.75	18.5944	181.25	0	18.5944
	Total StDev	13.5984	0.5	1.09415	13.5984	0	1.09415
	Total StErr	6.7992	0.25	0.547074	6.7992	0	0.547074
	Total n	4	4	4	4	4	4
	Bth-Bth
	1391473-F2	156	9	17.3333	156	0	17.3333
	1391473-M3	102	7	14.5714	102	0	14.5714
	1391473-M4	187	11	17	187	0	17
	1446655-M1	150	9	16.6667	150	0	16.6667
	1446655-M2	112	8	14	112	0	14
	1446655-M3
	Average	141.4	8.8	15.9143	141.4	0	15.9143
	StDev	34.5803	1.48324	1.51874	34.5803	0	1.51874
	StErr	15.4648	0.663325	0.679202	15.4648	0	0.679202
	n	5	5	5	5	5	5
	Synapse Counts P28
	22.6kHz
		Ribbons	IHCs	Ribbon:IHC Ratio	Ribbons w/ Terminals	Ribbons w/o Terminals	Synapse:IHC Ratio
	Control
	1249686-P28L1C	187	10	18.7	187	0	18.7
	1249686-P28L2C	192	10	19.2	192	0	19.2
	1249686-P28L3C	217	11	19.7273	217	0	19.7273
	1249686-P28L4C	191	11	17.3636	191	0	17.3636
	Total Average	196.75	10.5	18.7477	196.75	0	18.7477
	Total StDev	13.6717	0.57735	1.01358	13.6717	0	1.01358
	Total StErr	6.83587	0.288675	0.506791	6.83587	0	0.506791
	Total n	4	4	4	4	4	4
	Bth-Bth
	1391473-F2	167	10	16.7	167	0	16.7
	1391473-M3
	1391473-M4	89	6	14.8333	88	1	14.6667
	1446655-M1	51	3	17	51	0	17
	1446655-M2	97	5	19.4	95	2	19
	1446655-M3
	Average	101	6	16.9833	100.25	0.75	16.8417
	StDev	48.3598	2.94392	1.87469	48.5069	0.957427	1.77334
	StErr	24.1799	1.47196	0.937343	24.2534	0.478714	0.886668
	n	4	4	4	4	4	4
	Synapse Counts P28
	32.0kHz
		Ribbons	IHCs	Ribbon:IHC Ratio	Ribbons w/ Terminals	Ribbons w/o Terminals	Synapse:IHC Ratio
	Control
	1249686-P28L1C	168	9	18.6667	168	0	18.6667
	1249686-P28L2C	182	9	20.2222	182	0	20.2222
	1249686-P28L3C	180	10	18	180	0	18
	1249686-P28L4C	153	9	17	153	0	17
	Total Average	170.75	9.25	18.4722	170.75	0	18.4722
	Total StDev	13.351	0.5	1.35287	13.351	0	1.35287
	Total StErr	6.67551	0.25	0.676433	6.67551	0	0.676433
	Total n	4	4	4	4	4	4
	Bth-Bth
	1391473-F2	123	9	13.6667	123	0	13.6667
	1391473-M3	132	9	14.6667	132	0	14.6667
	1391473-M4
	1446655-M1	45	4	11.25	45	0	11.25
	1446655-M2	20	2	10	20	0	10
	1446655-M3
	Average	80	6	12.3958	80	0	12.3958
	StDev	55.9106	3.55903	2.14668	55.9106	0	2.14668
	StErr	27.9553	1.77951	1.07334	27.9553	0	1.07334
	n	4	4	4	4	4	4
