# Supplementary material for: Sensory transduction is required for normal development and maturation of cochlear inner hair cell synapses
Source: eLife journal article supplement (doi:10.7554/elife.69433), 2021-11-04
Supplement: supp [file elife-69433-supp-v1.zip › elife_poa_e69433_Figure_5_source_data_1.xlsx]

## Sheet: Fig 5B ABR Thresholds
	Frequency (kHz)
P28	8	11.3	16	22.6	32
CNL1217	75	70	65	85
Synapse #	11.8333	13.3333	14.3333	18.8333	16.75
CNL1218	45	40	35	80	90
Synapse #	14.2222	15	17.8889	14.8	16.75
CNL1220	40	30	25	55	95
Synapse #	14.3636	16.8	17.7273	19.1111	17.6
CNL1221	75	75	85	100	105
Synapse #	15.8889	16.1111	11.8	13.2222	10.6667
CNL 1402	90	75	60	95	100
Synapse #	12.2	13.2	17	14.4444	17.875
CNL 1404	85	95	105	100
Synapse #	12.2222	14.3	15	10.4444	13.4
CNL 1424	75	65	60	100	100
Synapse #	10.25	16.5	14.6667	17.4444	16.6667
CNL 1462	60	55	45	95	105
Synapse #	11.8889	13.6667	17.1111	15.3636	17.4
CNL 1615	60	50	45	85	90
Synapse #	12.5556	10.7778	15.4	16.8	13.4444
CNL 1617	45	45	40	60	85
Synapse #	13.4444	15.3		16.5	14
CNL 1620	35	50	85	85	95
Synapse #	14.5	14.1	16.7		10.4
CNL 1623	55	45	25	65	90
Synapse #		13.8	14.6	18.6667	16.6667
WT	35	20	20	30	40
Synapse #	15.7722	16.6778	18.5944	18.7477	18.4722
Tmc1 KO	110	110	110	110	110
Synapse #	11.6692	11.2743	11.4667	11.4444	10.7667

## Sheet: Fig. 5C-D WT Amplit. + Latency
		CNL 390						CNL 391						CNL 486						CNL 487						CNL 488						CNL 489						CNL 935						CNL 936
P1-N1 Amplitude	Level	8kHz	11.3kHz	16kHz	22.6kHz	32kHz		8kHz	11.3kHz	16kHz	22.6kHz	32kHz		8kHz	11.3kHz	16kHz	22.6kHz	32kHz		8kHz	11.3kHz	16kHz	22.6kHz	32kHz		8kHz	11.3kHz	16kHz	22.6kHz	32kHz		8kHz	11.3kHz	16kHz	22.6kHz	32kHz		8kHz	11.3kHz	16kHz	22.6kHz	32kHz		8kHz	11.3kHz	16kHz	22.6kHz	32kHz
	80	0.98	1.31	1.52	1.14	0.44		0.66		0.87	0.44	0.28		0.84		1.48		1.17		0.81		1.45		1.15								0.5						1.11	1.52	2.12	1.72	1.86		1.59	1.82	2.51	1.86	1.94
	75					0.35						0.18
	70	0.83	1.14	1.38	0.77	0.35		0.61		0.82	0.53	0.18		0.52	1.26	0.94	0.93	0.96		0.52	0.93	1.11		0.73					0.77			0.49			0.76			0.86	1.08	1.73	1.6	1.43		1.17	1.38	2.1	1.46	1.45
	65					0.19						0.16
	60	0.56	0.97	0.97	0.65	0.27		0.4		0.57	0.37	0.14		0.48	0.71	0.67	0.69	0.61		0.59	0.69	0.77	0.35	0.47		0.41			0.55	0.35		0.42	0.55		0.56	0.36		0.53	0.67	1.29	1.32	0.86		0.83	0.97	1.45	1.3	0.83
	55	0.47			0.48	0.2		0.36			0.39	0.08		0.44			0.53	0.48		0.42			0.28	0.38		0.37			0.44	0.3						0.27		0.48	0.59					0.69				0.54
	50	0.4	0.71	0.82	0.39	0.11		0.28	0.44	0.49	0.19			0.38	0.48	0.43	0.43	0.36		0.35	0.59	0.6	0.33	0.26		0.26	0.58		0.3	0.25		0.36	0.45	0.6	0.36	0.22		0.38	0.5	0.98	0.95	0.54		0.53	0.61	1	0.84	0.43
	45	0.32			0.21	0.14		0.29	0.41	0.4	0.16			0.31	0.42	0.37	0.3	0.29		0.29	0.59	0.5	0.33	0.14		0.23	0.36	0.29	0.24	0.14		0.4			0.31	0.18		0.24	0.35			0.39		0.38	0.43		0.64	0.4
	40	0.26	0.43	0.49	0.27			0.19	0.3	0.35	0.23			0.18	0.34	0.3	0.23	0.18		0.18	0.41	0.45	0.24	0.18		0.14	0.31	0.28	0.18	0.12		0.23	0.32	0.3	0.29	0.1		0.21	0.2	0.6	0.6	0.31		0.25	0.25	0.64	0.38	0.16
	35	0.19	0.31	0.42	0.1			0.14	0.27	0.31				0.09	0.29	0.28				0.13	0.21	0.32	0.19			0.15	0.25	0.23	0.11	0.16		0.16	0.2	0.28	0.12			0.1	0.15	0.45	0.38	0.26		0.18		0.43	0.28	0.17
	30	0.12	0.22	0.38	0.08			0.09	0.2	0.2				0.12	0.22	0.1				0.16	0.2	0.3	0.1			0.07	0.11	0.2		0.07			0.11	0.15	0.06			0.13	0.09	0.28	0.22	0.14		0.13		0.33	0.21	0.12
	25		0.13	0.21					0.11	0.17					0.12	0.12						0.13					0.1	0.11					0.1	0.15						0.23						0.16	0.12
	20																					0.14
Amplitude Slope		0.0174961	0.0225479	0.0243242	0.0208527	0.0087381		0.0118682	0.0132	0.0133697	0.00825749	0.00651429		0.013907	0.0225973	0.0231515	0.0239714	0.0256707		0.0132791	0.0181437	0.0213434	0.00728571	0.0247784		0.0112857	0.0183429	0.0088	0.0190492	0.00892857		0.00698678	0.014	0.0182973	0.0170838	0.0122		0.0204961	0.028124	0.0352877	0.0316075	0.0346257		0.0295659	0.0389895	0.043516	0.0332424	0.0370155
P1 Latency	80	1.68	1.52	1.32	1.36	1.44		1.68		1.32	1.36	1.48		1.64		1.48		1.32		1.6		1.4		1.4								1.6						1.56	1.52	1.36	1.28	1.32		1.56	1.52	1.4	1.32	1.32
	75					1.52						1.48
	70	1.76	1.56	1.4	1.44	1.56		1.8		1.4	1.44	1.52		1.72	1.52	1.52	1.4	1.36		1.72	1.56	1.44		1.4					1.4			1.64			1.28			1.68	1.64	1.44	1.36	1.4		1.64	1.6	1.44	1.36	1.44
	65					1.52						1.52
	60	1.88	1.64	1.52	1.48	1.56		1.84		1.48	1.52	1.48		1.76	1.64	1.64	1.44	1.44		1.76	1.68	1.52	1.6	1.48		1.76			1.48	1.48		1.84	1.6		1.44	1.48		1.76	1.72	1.52	1.4	1.44		1.76	1.72	1.52	1.44	1.52
	55	1.92			1.48	1.52		1.88			1.56	1.56		1.84			1.52	1.44		1.88			1.64	1.52		1.84			1.48	1.48						1.56		1.8	1.76					1.8				1.52
	50	2.04	1.76	1.6	1.56	1.6		1.88	1.64	1.6	1.56			1.92	1.8	1.68	1.52	1.56		1.92	1.76	1.48	1.64	1.56		1.88	1.76		1.56	1.56		1.88	1.72	1.52	1.48	1.68		1.92	1.84	1.6	1.48	1.52		1.84	1.8	1.6	1.52	1.52
	45	2.16			1.72	2		2.04	1.72	1.6	1.6			2	1.8	1.72	1.64	1.56		1.96	1.84	1.68	1.64	1.68		1.92	1.8	1.68	1.64	1.48		2.04			1.56	1.68		1.92	1.88			1.6		1.92	1.92		1.6	1.6
	40	2.16	1.88	1.72	1.68			2.2	1.76	1.64	1.72			2.08	1.88	1.64	1.64	1.8		2.08	1.84	1.68	1.68	1.72		2.12	1.96	1.56	1.64	1.64		2	1.84	1.72	1.64	1.76		2.04	2	1.68	1.6	1.68		1.92	2	1.68	1.6	1.68
	35	2.32	1.96	1.72	1.96			2.36	1.88	1.76				2.2	1.84	1.84				2.2	2.04	1.76	1.76			2.12	1.88	1.76	1.72	1.64		2.16	2	1.76	1.68			2.12	1.96	1.76	1.68	1.68		2.04		1.8	1.76	1.76
	30	2.44	1.96	1.8	2.04			2.44	1.96	1.76				2.44	2.04	1.92				2.32	1.96	1.88	1.92			2.28	2.08	1.88		1.76			2.04	1.72	1.84			2.36	2.08	1.76	1.76	1.8		2.16		1.84	1.8	1.84
	25		2.16	1.88					2.12	1.92					2.12	2						1.96					2.36	2.08					2.28	1.68						1.92						1.96	1.88
	20																					2
Latency Slope		-0.0151628	-0.0110137	-0.00986301	-0.0131783	-0.0100952		-0.0150698	-0.0185143	-0.00998788	-0.00792814	-0.00228571		-0.0146667	-0.0123622	-0.00875152	-0.0088	-0.0102754		-0.0137984	-0.0110419	-0.01054	-0.00885714	-0.00843114		-0.0168571	-0.0214857	-0.0224	-0.00918033	-0.00885714		-0.0122115	-0.0181176	-0.00648649	-0.0125749	-0.0136		-0.0142326	-0.0108527	-0.00924201	-0.00928328	-0.0091462		-0.0112248	-0.0117895	-0.00988128	-0.0103273	-0.00951938
[truncated: 11 more columns]

## Sheet: Fig 5C-D Tmc1 inj. A + L
		CNL 1217						CNL 1218						CNL 1220						CNL 1221						CNL 1402						CNL 1404						CNL 1424						CNL 1462
P1-N1 Amplitude	Level	8kHz	11.3kHz	16kHz	22.6kHz	32kHz		8kHz	11.3kHz	16kHz	22.6kHz	32kHz		8kHz	11.3kHz	16kHz	22.6kHz	32kHz		8kHz	11.3kHz	16kHz	22.6kHz	32kHz		8kHz	11.3kHz	16kHz	22.6kHz	32kHz		8kHz	11.3kHz	16kHz	22.6kHz	32kHz		8kHz	11.3kHz	16kHz	22.6kHz	32kHz		8kHz	11.3kHz	16kHz	22.6kHz	32kHz
	110		0.59	0.53	0.09			0.71			0.77	0.16						0.17		0.43	0.93	0.57	0.11	0.13		0.23	0.51	1.85	0.23	0.16		0.7	0.97	0.19	0.13			0.35	0.48	0.46	0.19	0.14		0.77	0.86	0.72	0.3	0.07
	105				0.17							0.16						0.17					0.07	0.06		0.25	0.37		0.19	0.07				0.07	0.15			0.26			0.14	0.11						0.03
	100		0.33	0.37	0.11			0.75	1.07	0.97	0.44	0.1						0.04		0.23	0.38	0.16	0.09			0.23	0.33	0.39	0.2	0.07		0.44	0.24		0.05			0.21	0.35	0.42	0.15	0.08		0.63	0.73	0.61	0.23
	95				0.11							0.07						0.09				0.14				0.2	0.22	0.32	0.16			0.38	0.06					0.2	0.25	0.3							0.12
	90		0.33	0.37	0.06			0.73	0.85	0.76	0.14	0.09		1.11	1.51	1.76	0.89			0.21	0.21	0.06				0.09	0.14	0.32				0.4						0.18	0.27	0.31				0.51	0.71	0.65
	85		0.16		0.05						0.18									0.16	0.12	0.13					0.19	0.22				0.2						0.13	0.2	0.25
	80		0.17	0.32				0.44	0.58	0.69	0.14			0.92	1.38	1.55	0.79			0.15	0.15						0.13	0.24										0.13	0.21	0.26				0.27	0.55	0.63
	75		0.17	0.24				0.34												0.12	0.09						0.13	0.17										0.12	0.14	0.17				0.17	0.35	0.51
	70		0.23	0.1				0.3	0.36	0.55				0.71	1.08	1.35	0.5											0.19											0.1	0.12				0.08	0.26	0.43
	65			0.12				0.12	0.33								0.31											0.11											0.12	0.12				0.13	0.16	0.31
	60							0.19	0.36	0.38				0.5	0.85	0.95	0.17											0.15												0.11				0.07	0.12	0.29
	55							0.18	0.19	0.33				0.33			0.1																												0.08	0.2
	50							0.13	0.14	0.27				0.26	0.62	0.91																														0.17
	45							0.09	0.14	0.14				0.18	0.5																															0.12
	40								0.1	0.13				0.12	0.4	0.54
	35									0.07					0.25	0.44
	30														0.17	0.34
	25															0.16
Amplitude Slope			0.00931138	0.00876652	0.00302857			0.01174	0.0161382	0.0137681	0.0215345	0.0046		0.0207193	0.02324	0.0244549	0.0246471	0.0074		0.008	0.0222941	0.0180811	0.002	0.014		0.0066	0.010381	0.0229957	0.004	0.009		0.0177838	0.0624286	0.024	0.008			0.006	0.00788065	0.00754978	0.004	0.006		0.0152105	0.0155333	0.00982947	0.0112857	0.008
P1 Latency	110		1.12	1.08	1.4			1.4			1.32	1.36						1.56		1.48	1.48	1.48	1.4	1.56		1.28	1.28	1	1.24	1.44		1.72	1.6	1.56	1.36			1.48	1.2	1.28	1.44	1.24		1.28	1.24	1.28	1.36	1.28
	105				1.32							1.48						1.56					1.44	1.84		1.36	1.28		1.2	1.56				1.8	1.48			1.4			1.44	1.6						1.56
	100		1.2	1.08	1.36			1.4	1.36	1.32	1.4	1.52						1.48		1.68	1.56	1.4	1.6			1.44	1.36	1.16	1.24	1.6		1.84	1.76		1.6			1.44	1.4	1.32	1.44	1.72		1.36	1.28	1.28	1.36
	95				1.56							1.6						1.8				1.48				1.44	1.36	1.4	1.32			2	1.76					1.64	1.4	1.32							1.44
	90		1.36	1.2	1.56			1.52	1.4	1.36	1.52	1.72		1.52	1.44	1.4	1.4			1.76	1.52	1.4				1.8	1.48	1.24				2.12						1.64	1.4	1.32				1.44	1.32	1.24
	85		1.36		1.6						1.72									1.8	1.68	1.68					1.48	1.4				2.28						1.76	1.4	1.4
	80		1.52	1.4				1.6	1.44	1.44	1.8			1.6	1.48	1.4	1.44			1.84	1.64						1.48	1.52										1.88	1.44	1.4				1.48	1.32	1.36
	75		1.48	1.36				1.56												1.92	1.84						1.56	1.56										1.8	1.48	1.6				1.52	1.44	1.4
	70		1.56	1.44				1.68	1.56	1.52				1.64	1.52	1.48	1.56											1.56											1.64	1.6				1.8	1.52	1.48
	65			1.52				1.72	1.56								1.6											1.64											1.88	1.68				1.72	1.52	1.56
	60							1.68	1.64	1.56				1.76	1.6	1.56	1.68											1.64												1.8				1.88	1.64	1.48
	55							1.76	1.68	1.64				1.88			1.68																												1.72	1.48
	50							1.84	1.8	1.6				1.96	1.68	1.64																														1.64
	45							2.16	1.84	1.72				2.04	1.72																															1.72
	40								1.96	1.8				2.12	1.8	1.72
	35									1.88					1.84	1.84
	30														1.96	1.88
	25															1.96
Latency Slope			-0.0113772	-0.0104317	-0.0109714			-0.00934737	-0.00976818	-0.00811594	-0.0163448	-0.0168		-0.0122339	-0.008224	-0.00889412	-0.00894118	-0.0128		-0.0115294	-0.00847059	-0.00551351	-0.02	-0.056		-0.0224	-0.00819048	-0.0127965	-0.0056	-0.016		-0.0225946	-0.0114286	-0.048	-0.024			-0.0133333	-0.0113548	-0.010632	0	-0.048		-0.0115088	-0.00848485	-0.00672	-0.00457143	-0.056
[truncated: 20 more columns]
