# Supplementary material for: Sensory transduction is required for normal development and maturation of cochlear inner hair cell synapses
Source: eLife journal article supplement (doi:10.7554/elife.69433), 2021-11-04
Supplement: supp [file elife-69433-supp-v1.zip › elife_poa_e69433_Figure_6_source_data_1.xlsx]

## Sheet: Fig. 6A Tmc1 KO Synapse Counts
				Tmc1 KO
	Synapse Counts P28
	8.0kHz
		Ribbons	IHCs	Ribbon:IHC Ratio	Ribbons w/ Terminals	Ribbons w/o Terminals	Synapse:IHC Ratio
	Control
	1249686-P28L1C	152	10	15.2	152	0	15.2
	1249686-P28L2C	141	9	15.6667	141	0	15.6667
	1249686-P28L3C	150	9	16.6667	150	0	16.6667
	1249686-P28L4C	140	9	15.5556	140	0	15.5556
	Total Average	145.75	9.25	15.7722	145.75	0	15.7722
	Total StDev	6.13052	0.5	0.628638	6.13052	0	0.628638
	Total StErr	3.06526	0.25	0.314319	3.06526	0	0.314319
	Total n	4	4	4	4	4	4
	Tmc-/+
	1249510-L1C	127	9	14.1111	119	8	13.2222
	1249510-L2C	101	9	11.2222	100	1	11.1111
	1249510-L3C	89	9	9.88889	89	0	9.88889
	1249510-L4C	142	11	12.9091	137	5	12.4545
	Total Average	114.75	9.5	12.0328	111.25	3.5	11.6692
	Total StDev	24.116	1	1.85658	21.1719	3.69685	1.47305
	Total StErr	12.058	0.5	0.928289	10.586	1.84842	0.736524
	Total n	4	4	4	4	4	4
	Synapse Counts P28
	11.3kHz
		Ribbons	IHCs	Ribbon:IHC Ratio	Ribbons w/ Terminals	Ribbons w/o Terminals	Synapse:IHC Ratio
	Control
	1249686-P28L1C	152	10	15.2	152	0	15.2
	1249686-P28L2C	149	9	16.5556	148	1	16.4444
	1249686-P28L3C	168	9	18.6667	168	0	18.6667
	1249686-P28L4C	164	10	16.4	164		16.4
	Total Average	158.25	9.5	16.7056	158	0.333333	16.6778
	Total StDev	9.17878	0.57735	1.44089	9.5219	0.57735	1.44581
	Total StErr	4.58939	0.288675	0.720447	4.76095	0.333333	0.722906
	Total n	4	4	4	4	3	4
	Tmc-/+
	1249510-L1C	119	9	13.2222	114	5	12.6667
	1249510-L2C	110	10	11	110	0	11
	1249510-L3C	88	8	11	87	1	10.875
	1249510-L4C	95	9	10.5556	95	0	10.5556
	Total Average	103	9	11.4444	101.5	1.5	11.2743
	Total StDev	14.0712	0.816497	1.20356	12.6623	2.38048	0.946918
	Total StErr	7.03562	0.408248	0.601781	6.33114	1.19024	0.473459
	Total n	4	4	4	4	4	4
	Synapse Counts P28
	16.0kHz
		Ribbons	IHCs	Ribbon:IHC Ratio	Ribbons w/ Terminals	Ribbons w/o Terminals	Synapse:IHC Ratio
	Control
	1249686-P28L1C	192	10	19.2	192	0	19.2
	1249686-P28L2C	169	9	18.7778	169	0	18.7778
	1249686-P28L3C	194	10	19.4	194	0	19.4
	1249686-P28L4C	170	10	17	170	0	17
	Total Average	181.25	9.75	18.5944	181.25	0	18.5944
	Total StDev	13.5984	0.5	1.09415	13.5984	0	1.09415
	Total StErr	6.7992	0.25	0.547074	6.7992	0	0.547074
	Total n	4	4	4	4	4	4
	Tmc-/+
	1249510-L1C	117	10	11.7	116	1	11.6
	1249510-L2C	107	9	11.8889	105	2	11.6667
	1249510-L3C	103	10	10.3	102	1	10.2
	1249510-L4C	126	10	12.6	124	2	12.4
	Total Average	113.25	9.75	11.6222	111.75	1.5	11.4667
	Total StDev	10.3401	0.5	0.962892	10.1448	0.57735	0.918937
	Total StErr	5.17003	0.25	0.481446	5.07239	0.288675	0.459468
	Total n	4	4	4	4	4	4
	Synapse Counts P28
	22.6kHz
		Ribbons	IHCs	Ribbon:IHC Ratio	Ribbons w/ Terminals	Ribbons w/o Terminals	Synapse:IHC Ratio
	Control
	1249686-P28L1C	187	10	18.7	187	0	18.7
	1249686-P28L2C	192	10	19.2	192	0	19.2
	1249686-P28L3C	217	11	19.7273	217	0	19.7273
	1249686-P28L4C	191	11	17.3636	191	0	17.3636
	Total Average	196.75	10.5	18.7477	196.75	0	18.7477
	Total StDev	13.6717	0.57735	1.01358	13.6717	0	1.01358
	Total StErr	6.83587	0.288675	0.506791	6.83587	0	0.506791
	Total n	4	4	4	4	4	4
	Tmc-/+
	1249510-L1C	120	9	13.3333	115	5	12.7778
	1249510-L2C	113	10	11.3	111	2	11.1
	1249510-L3C	105	10	10.5	105	0	10.5
	1249510-L4C	117	10	11.7	114	3	11.4
	Total Average	113.75	9.75	11.7083	111.25	2.5	11.4444
	Total StDev	6.5	0.5	1.19269	4.5	2.08167	0.964429
	Total StErr	3.25	0.25	0.596343	2.25	1.04083	0.482215
	Total n	4	4	4	4	4	4
	Synapse Counts P28
	32.0kHz
		Ribbons	IHCs	Ribbon:IHC Ratio	Ribbons w/ Terminals	Ribbons w/o Terminals	Synapse:IHC Ratio
	Control
	1249686-P28L1C	168	9	18.6667	168	0	18.6667
	1249686-P28L2C	182	9	20.2222	182	0	20.2222
	1249686-P28L3C	180	10	18	180	0	18
	1249686-P28L4C	153	9	17	153	0	17
	Total Average	170.75	9.25	18.4722	170.75	0	18.4722
	Total StDev	13.351	0.5	1.35287	13.351	0	1.35287
	Total StErr	6.67551	0.25	0.676433	6.67551	0	0.676433
	Total n	4	4	4	4	4	4
	Tmc-/+
	1249510-L1C	95	10	9.5	92	3	9.2
	1249510-L2C	131	10	13.1	116	15	11.6
	1249510-L3C	96	9	10.6667	96	0	10.6667
	1249510-L4C	119	10	11.9	116	3	11.6
	Total Average	110.25	9.75	11.2917	105	5.25	10.7667
	Total StDev	17.7271	0.5	1.55358	12.8062	6.65207	1.13333
	Total StErr	8.86355	0.25	0.77679	6.40312	3.32603	0.566667
	Total n	4	4	4	4	4	4

## Sheet: Fig. 6A Tmc1 KO inj. Counts
	5.6kHz		PhPB-Myo6-Tmc1 P28									PhPB-CMV-Tmc1 P28
	Synapse Counts P28									Synapse Counts P28
	8.0kHz									8.0kHz
		Ribbons	IHCs	Ribbon:IHC Ratio	Ribbons w/ Terminals	Ribbons w/o Terminals	Synapse:IHC Ratio				Ribbons	IHCs	Ribbon:IHC Ratio	Ribbons w/ Terminals	Ribbons w/o Terminals	Synapse:IHC Ratio
	Tmc-/+ Control									Tmc-/+ Control
	1249510-L1C	127	9	14.1111	119	8	13.2222			1249510-L1C	127	9	14.1111	119	8	13.2222
	1249510-L2C	101	9	11.2222	100	1	11.1111			1249510-L2C	101	9	11.2222	100	1	11.1111
	1249510-L3C	89	9	9.88889	89	0	9.88889			1249510-L3C	89	9	9.88889	89	0	9.88889
	1249510-L4C	142	11	12.9091	137	5	12.4545			1249510-L4C	142	11	12.9091	137	5	12.4545
	Total Average	114.75	9.5	12.0328	111.25	3.5	11.6692			Total Average	114.75	9.5	12.0328	111.25	3.5	11.6692
	Total StDev	24.116	1	1.85658	21.1719	3.69685	1.47305			Total StDev	24.116	1	1.85658	21.1719	3.69685	1.47305
	Total StErr	10.785	0.447214	0.830287	9.46837	1.65328	0.658767			Total StErr	10.785	0.447214	0.830287	9.46837	1.65328	0.658767
	Total n	5	5	5	5	5	5			Total n	5	5	5	5	5	5
	Tmc-/+ P1 Injection									Tmc-/+ P1 Injection
	CNL1198	104	9	11.5556	94	10	10.4444			CNL 1217	73	6	12.1667	71	2	11.8333
	CNL1199	94	9	10.4444	91	3	10.1111			CNL 1218	128	9	14.2222	128	0	14.2222
	CNL1201	104	9	11.5556	102	2	11.3333			CNL 1220	158	11	14.3636	158	0	14.3636
	CNL1202	114	11	10.3636	114	0	10.3636			CNL 1221	143	9	15.8889	143	0	15.8889
										CNL 1402	62	5	12.4	61	1	12.2
										CNL 1404	110	9	12.2222	110	0	12.2222
										CNL 1424	83	8	10.375	82	1	10.25
										CNL 1462	107	9	11.8889	107	0	11.8889
										CNL 1615	113	9	12.5556	113	0	12.5556
										CNL 1617	122	9	13.5556	121	1	13.4444
										CNL 1620	146	10	14.6	145	1	14.5
										CNL 1623
	Average	104	9.5	10.9798	100.25	3.75	10.5631			Average	113.182	8.54545	13.1126	112.636	0.545455	13.0336
	StDev	8.16497	1	0.665646	10.2754	4.34933	0.532735			StDev	30.7663	1.69491	1.56238	31.1617	0.687552	1.60421
	StErr	4.08248	0.5	0.332823	5.13769	2.17466	0.266367			StErr	9.27638	0.511035	0.471075	9.39562	0.207305	0.483687
	n	4	4	4	4	4	4			n	11	11	11	11	11	11
	Synapse Counts P28									Synapse Counts P28
	11.3kHz									11.3kHz
		Ribbons	IHCs	Ribbon:IHC Ratio	Ribbons w/ Terminals	Ribbons w/o Terminals	Synapse:IHC Ratio				Ribbons	IHCs	Ribbon:IHC Ratio	Ribbons w/ Terminals	Ribbons w/o Terminals	Synapse:IHC Ratio
	Tmc-/+ Control									Tmc-/+ Control
	1249510-L1C	119	9	13.2222	114	5	12.6667			1249510-L1C	119	9	13.2222	114	5	12.6667
	1249510-L2C	110	10	11	110	0	11			1249510-L2C	110	10	11	110	0	11
	1249510-L3C	88	8	11	87	1	10.875			1249510-L3C	88	8	11	87	1	10.875
	1249510-L4C	95	9	10.5556	95	0	10.5556			1249510-L4C	95	9	10.5556	95	0	10.5556
	Average	103	9	11.4444	101.5	1.5	11.2743			Average	103	9	11.4444	101.5	1.5	11.2743
	StDev	14.0712	0.816497	1.20356	12.6623	2.38048	0.946918			StDev	14.0712	0.816497	1.20356	12.6623	2.38048	0.946918
	StErr	7.03562	0.408248	0.601781	6.33114	1.19024	0.473459			StErr	7.03562	0.408248	0.601781	6.33114	1.19024	0.473459
	n	4	4	4	4	4	4			n	4	4	4	4	4	4
	Tmc-/+ P1 Injection									Tmc-/+ P1 Injection
	CNL1198	98	9	10.8889	91	7	10.1111			CNL 1217	80	6	13.3333	80	0	13.3333
	CNL1199	116	10	11.6	113	3	11.3			CNL 1218	135	9	15	135	0	15
	CNL1201	103	9	11.4444	103	0	11.4444			CNL 1220	168	10	16.8	168	0	16.8
	CNL1202	100	9	11.1111	97	3	10.7778			CNL 1221	145	9	16.1111	145	0	16.1111
										CNL 1402	68	5	13.6	66	2	13.2
										CNL 1404	143	10	14.3	143	0	14.3
										CNL 1424	132	8	16.5	132	0	16.5
										CNL 1462	123	9	13.6667	123	0	13.6667
										CNL 1615	97	9	10.7778	97	0	10.7778
										CNL 1617	155	10	15.5	153	2	15.3
										CNL 1620	142	10	14.2	141	1	14.1
										CNL 1623	138	10	13.8	138	0	13.8
	Average	104.25	9.25	11.2611	101	3.25	10.9083			Average	127.167	8.75	14.4657	126.75	0.416667	14.4074
	StDev	8.09835	0.5	0.321199	9.38083	2.87228	0.603718			StDev	30.28	1.65831	1.66412	30.4336	0.792961	1.67775
	StErr	4.04918	0.25	0.160599	4.69042	1.43614	0.301859			StErr	8.74108	0.478714	0.480389	8.78543	0.228908	0.484325
	n	4	4	4	4	4	4			n	12	12	12	12	12	12
	Synapse Counts P28									Synapse Counts P28
	16.0kHz									16.0kHz
		Ribbons	IHCs	Ribbon:IHC Ratio	Ribbons w/ Terminals	Ribbons w/o Terminals	Synapse:IHC Ratio				Ribbons	IHCs	Ribbon:IHC Ratio	Ribbons w/ Terminals	Ribbons w/o Terminals	Synapse:IHC Ratio
	Tmc-/+ Control									Tmc-/+ Control
	1249510-L1C	117	10	11.7	116	1	11.6			1249510-L1C	117	10	11.7	116	1	11.6
	1249510-L2C	107	9	11.8889	105	2	11.6667			1249510-L2C	107	9	11.8889	105	2	11.6667
	1249510-L3C	103	10	10.3	102	1	10.2			1249510-L3C	103	10	10.3	102	1	10.2
	1249510-L4C	126	10	12.6	124	2	12.4			1249510-L4C	126	10	12.6	124	2	12.4
	Total Average	113.25	9.75	11.6222	111.75	1.5	11.4667			Total Average	113.25	9.75	11.6222	111.75	1.5	11.4667
	Total StDev	10.3401	0.5	0.962892	10.1448	0.57735	0.918937			Total StDev	10.3401	0.5	0.962892	10.1448	0.57735	0.918937
	Total StErr	5.17003	0.25	0.481446	5.07239	0.288675	0.459468			Total StErr	5.17003	0.25	0.481446	5.07239	0.288675	0.459468
	Total n	4	4	4	4	4	4			Total n	4	4	4	4	4	4
	Tmc-/+ P1 Injection									Tmc-/+ P1 Injection
	CNL1198	111	10	11.1	108	3	10.8			CNL 1217	86	6	14.3333	86	0	14.3333
	CNL1199	112	10	11.2	109	3	10.9			CNL 1218	161	9	17.8889	161	0	17.8889
	CNL1201	93	9	10.3333	91	2	10.1111			CNL 1220	196	11	17.8182	195	1	17.7273
	CNL1202	93	9	10.3333	92	1	10.2222			CNL 1221	118	10	11.8	118	0	11.8
										CNL 1402	85	5	17	85	0	17
										CNL 1404	135	9	15	135	0	15
										CNL 1424	133	9	14.7778	132	1	14.6667
										CNL 1462	154	9	17.1111	154	0	17.1111
										CNL 1615	155	10	15.5	154	1	15.4
										CNL 1617
										CNL 1620	168	10	16.8	167	1	16.7
										CNL 1623	146	10	14.6	146	0	14.6
	Average	102.25	9.5	10.7417	100	2.25	10.5083			Average	139.727	8.90909	15.6936	139.364	0.363636	15.657
	StDev	10.6888	0.57735	0.473267	9.83192	0.957427	0.399215			StDev	33.6395	1.81409	1.83948	33.3655	0.504525	1.83023
	StErr	5.34439	0.288675	0.236633	4.91596	0.478714	0.199607			StErr	10.1427	0.546968	0.554625	10.0601	0.15212	0.551836
	n	4	4	4	4	4	4			n	11	11	11	11	11	11
	Synapse Counts P28									Synapse Counts P28
	22.6kHz									22.6kHz
		Ribbons	IHCs	Ribbon:IHC Ratio	Ribbons w/ Terminals	Ribbons w/o Terminals	Synapse:IHC Ratio				Ribbons	IHCs	Ribbon:IHC Ratio	Ribbons w/ Terminals	Ribbons w/o Terminals	Synapse:IHC Ratio
	Tmc-/+ Control									Tmc-/+ Control
	1249510-L1C	120	9	13.3333	115	5	12.7778			1249510-L1C	120	9	13.3333	115	5	12.7778
	1249510-L2C	113	10	11.3	111	2	11.1			1249510-L2C	113	10	11.3	111	2	11.1
	1249510-L3C	105	10	10.5	105	0	10.5			1249510-L3C	105	10	10.5	105	0	10.5
	1249510-L4C	117	10	11.7	114	3	11.4			1249510-L4C	117	10	11.7	114	3	11.4
	Total Average	113.75	9.75	11.7083	111.25	2.5	11.4444			Total Average	113.75	9.75	11.7083	111.25	2.5	11.4444
	Total StDev	6.5	0.5	1.19269	4.5	2.08167	0.964429			Total StDev	6.5	0.5	1.19269	4.5	2.08167	0.964429
	Total StErr	3.25	0.25	0.596343	2.25	1.04083	0.482215			Total StErr	3.25	0.25	0.596343	2.25	1.04083	0.482215
	Total n	4	4	4	4	4	4			Total n	4	4	4	4	4	4
	Tmc-/+ P1 Injection									Tmc-/+ P1 Injection
	CNL1198	98	10	9.8	98	0	9.8			CNL 1217	113	6	18.8333	113	0	18.8333
	CNL1199	116	9	12.8889	115	1	12.7778			CNL 1218	148	10	14.8	148	0	14.8
	CNL1201	92	9	10.2222	92	0	10.2222			CNL 1220	172	9	19.1111	172	0	19.1111
	CNL1202	106	11	9.63636	106	0	9.63636			CNL 1221	119	9	13.2222	119	0	13.2222
										CNL 1402	134	9	14.8889	130	4	14.4444
										CNL 1404	94	9	10.4444	94	0	10.4444
										CNL 1424	160	9	17.7778	157	3	17.4444
										CNL 1462	169	11	15.3636	169	0	15.3636
										CNL 1615	168	10	16.8	168	0	16.8
										CNL 1617	167	10	16.7	165	2	16.5
										CNL 1620
										CNL 1623	169	9	18.7778	168	1	18.6667
	Average	103	9.75	10.6369	102.75	0.25	10.6091			Average	146.636	9.18182	16.0654	145.727	0.909091	15.9664
	StDev	10.3923	0.957427	1.5215	9.97914	0.5	1.46671			StDev	27.4236	1.25045	2.67069	27.2694	1.446	2.65757
	StErr	5.19615	0.478714	0.76075	4.98957	0.25	0.733354			StErr	8.26853	0.377026	0.805245	8.22202	0.435985	0.801288
	n	4	4	4	4	4	4			n	11	11	11	11	11	11
	Synapse Counts P28									Synapse Counts P28
	32.0kHz									32.0kHz
		Ribbons	IHCs	Ribbon:IHC Ratio	Ribbons w/ Terminals	Ribbons w/o Terminals	Synapse:IHC Ratio				Ribbons	IHCs	Ribbon:IHC Ratio	Ribbons w/ Terminals	Ribbons w/o Terminals	Synapse:IHC Ratio
	Tmc-/+ Control									Tmc-/+ Control
	1249510-L1C	95	10	9.5	92	3	9.2			1249510-L1C	95	10	9.5	92	3	9.2
	1249510-L2C	131	10	13.1	116	15	11.6			1249510-L2C	131	10	13.1	116	15	11.6
	1249510-L3C	96	9	10.6667	96	0	10.6667			1249510-L3C	96	9	10.6667	96	0	10.6667
	1249510-L4C	119	10	11.9	116	3	11.6			1249510-L4C	119	10	11.9	116	3	11.6
	Total Average	110.25	9.75	11.2917	105	5.25	10.7667			Total Average	110.25	9.75	11.2917	105	5.25	10.7667
	Total StDev	17.7271	0.5	1.55358	12.8062	6.65207	1.13333			Total StDev	17.7271	0.5	1.55358	12.8062	6.65207	1.13333
	Total StErr	8.86355	0.25	0.77679	6.40312	3.32603	0.566667			Total StErr	8.86355	0.25	0.77679	6.40312	3.32603	0.566667
	Total n	4	4	4	4	4	4			Total n	4	4	4	4	4	4
	Tmc-/+ P1 Injection									Tmc-/+ P1 Injection
	CNL1198	96	9	10.6667	91	5	10.1111			CNL 1217	134	8	16.75	134	0	16.75
	CNL1199	102	9	11.3333	101	1	11.2222			CNL 1218	134	8	16.75	134	0	16.75
	CNL1201	83	9	9.22222	83	0	9.22222			CNL 1220	176	10	17.6	176	0	17.6
	CNL1202	95	9	10.5556	94	1	10.4444			CNL 1221	96	9	10.6667	96	0	10.6667
										CNL 1402	143	8	17.875	143	0	17.875
										CNL 1404	134	10	13.4	134	0	13.4
										CNL 1424	152	9	16.8889	150	2	16.6667
										CNL 1462	174	10	17.4	174	0	17.4
										CNL 1615	121	9	13.4444	121	0	13.4444
										CNL 1617	71	5	14.2	70	1	14
										CNL 1620	104	10	10.4	104	0	10.4
										CNL 1623	150	9	16.6667	150	0	16.6667
	Average	94	9	10.4444	92.25	1.75	10.25			Average	132.417	8.75	15.1701	132.167	0.25	15.135
	StDev	7.95822	0	0.884247	7.45542	2.21736	0.82838			StDev	30.8617	1.42223	2.67083	30.9335	0.621582	2.66569
	StErr	3.97911	0	0.442124	3.72771	1.10868	0.41419			StErr	8.90902	0.410561	0.771001	8.92972	0.179435	0.76952
	n	4	4	4	4	4	4			n	12	12	12	12	12	12

## Sheet: Fig. 6B ABR + Synapse Counts
	Frequency (kHz)
P28	8	11.3	16	22.6	32
CNL1217	75	70	65	85
Synapse #	11.8333	13.3333	14.3333	18.8333	16.75
CNL1218	45	40	35	80	90
Synapse #	14.2222	15	17.8889	14.8	16.75
CNL1220	40	30	25	55	95
Synapse #	14.3636	16.8	17.7273	19.1111	17.6
CNL1221	75	75	85	100	105
Synapse #	15.8889	16.1111	11.8	13.2222	10.6667
CNL 1402	90	75	60	95	100
Synapse #	12.2	13.2	17	14.4444	17.875
CNL 1404	85	95	105	100
Synapse #	12.2222	14.3	15	10.4444	13.4
CNL 1424	75	65	60	100	100
Synapse #	10.25	16.5	14.6667	17.4444	16.6667
CNL 1462	60	55	45	95	105
Synapse #	11.8889	13.6667	17.1111	15.3636	17.4
CNL 1615	60	50	45	85	90
Synapse #	12.5556	10.7778	15.4	16.8	13.4444
CNL 1617	45	45	40	60	85
Synapse #	13.4444	15.3		16.5	14
CNL 1620	35	50	85	85	95
Synapse #	14.5	14.1	16.7		10.4
CNL 1623	55	45	25	65	90
Synapse #		13.8	14.6	18.6667	16.6667
WT	35	20	20	30	40
Synapse #	15.7722	16.6778	18.5944	18.7477	18.4722
Tmc1 KO	110	110	110	110	110
Synapse #	11.6692	11.2743	11.4667	11.4444	10.7667

## Sheet: Fig. 6B Data by Frequency
All	75	70	65	85		45	40	35	80	90	40	30	25	55	95	75	75	85	100	105	90	75	60	95	100	85	95	105	100		75	65	60	100	100	60	55	45	95	105	60	50	45	85	90	45	45	40	60
	11.8333	13.3333	14.3333	18.8333		14.2222	15	17.8889	14.8	16.75	14.3636	16.8	17.7273	19.1111	17.6	15.8889	16.1111	11.8	13.2222	10.6667	12.2	13.2	17	14.4444	17.875	12.2222	14.3	15	10.4444	13.4	10.25	16.5	14.6667	17.4444	16.6667	11.8889	13.6667	17.1111	15.3636	17.4	12.5556	10.7778	15.4	16.8	13.4444	13.4444	15.3		16.5
	CNL1217	CNL1218	CNL1220	CNL1221	CNL 1402	CNL 1404	CNL 1424	CNL 1462	CNL 1615	CNL 1617	CNL 1620	CNL 1623	WT	Tmc1 KO
8kHz	75	45	40	75	90	85	75	60	60	45	35	55	35	110
	11.8333	14.2222	14.3636	15.8889	12.2	12.2222	10.25	11.8889	12.5556	13.4444	14.5		15.7722	11.6692
11.3kHz	70	40	30	75	75	95	65	55	50	45	50	45	20	110
	13.3333	15	16.8	16.1111	13.2	14.3	16.5	13.6667	10.7778	15.3	14.1	13.8	16.6778	11.2743
16kHz	65	35	25	85	60	105	60	45	45	40	85	25	20	110
	14.3333	17.8889	17.7273	11.8	17	15	14.6667	17.1111	15.4		16.7	14.6	18.5944	11.4667
22.6kHz	85	80	55	100	95	100	100	95	85	60	85	65	30	110
	18.8333	14.8	19.1111	13.2222	14.4444	10.4444	17.4444	15.3636	16.8	16.5		18.6667	18.7477	11.4444
32kHz		90	95	105	100		100	105	90	85	95	90	40	110
	16.75	16.75	17.6	10.6667	17.875	13.4	16.6667	17.4	13.4444	14	10.4	16.6667	18.4722	10.7667
[truncated: 21 more columns]

## Sheet: Fig. 6C Ribbon Vol. Normalized
1218	8.0kHz							11.3kHz							16.0kHz							22.6kHz							32.0kHz
1220	Tmc1 KO		WT		Tmc1 KO inj.			Tmc1 KO		WT		Tmc1 KO inj.			Tmc1 KO		WT		Tmc1 KO inj.			Tmc1 KO		WT		Tmc1 KO inj.			Tmc1 KO		WT		Tmc1 KO inj.
1402	Volume (um^3)	Normalized	Volume (um^3)	Normalized	Volume (um^3)	Normalized		Volume (um^3)	Normalized	Volume (um^3)	Normalized	Volume (um^3)	Normalized		Volume (um^3)	Normalized	Volume (um^3)	Normalized	Volume (um^3)	Normalized		Volume (um^3)	Normalized	Volume (um^3)	Normalized	Volume (um^3)	Normalized		Volume (um^3)	Normalized	Volume (um^3)	Normalized	Volume (um^3)	Normalized
1424	0.0454292	60.3649	0.203986	113.875	0.114066	79.5972		0.137492	163.487	0.294981	170.886	0.158457	97.0979		0.00107577	1.13939	0.223116	114.147	0.17469	106.819		0.00702002	9.21486	0.559196	205.188	0.237613	101.793		0.10869	69.2485	0.236791	80.4692	0.227283	112.188
	0.00236878	3.14756	0.176523	98.5438	0.270907	189.044		0.172876	205.562	0.316552	183.382	0.103182	63.227		0.308767	327.026	0.0978381	50.0542	0.200142	122.383		0.0140792	18.4811	0.421504	154.664	0.030828	13.2067		0.165477	105.429	0.256687	87.2305	0.110078	54.3351
	0.0933997	124.107	0.32706	182.581	0.180919	126.248		0.00968357	11.5144	0.0140388	8.13282	0.14135	86.6152		0.121751	128.951	0.236298	120.89	0.198527	121.395		0.106597	139.925	0.251648	92.3381	0.231341	99.1061		0.151206	96.3362	0.228016	77.4871	0.149743	73.9139
	0.00806121	10.7115	0.145836	81.4128	0.269424	188.009		0.143654	170.815	0.0784334	45.4373	0.0961417	58.9129		0.22532	238.644	0.255738	130.836	0.140183	85.7189		0.254037	333.463	0.419286	153.85	0.352293	150.922		0.0982453	62.594	0.24098	81.8927	0.201659	99.54
	0.0310663	41.2799	0.370216	206.673	0.180967	126.282		0.0291929	34.7124	0.0222846	12.9097	0.130297	79.8423		0.116859	123.769	0.229925	117.63	0.166207	101.632		0.0406373	53.3427	0.285252	104.668	0.118143	50.6123		0.470358	299.674	0.357441	121.47	0.362071	178.72
	0.0926725	123.14	0.094665	52.8467	0.12119	84.5685		0.00343654	4.08628	0.0396837	22.9892	0.150661	92.3207		0.00241884	2.56188	0.239077	122.312	0.184128	112.59		0.0926928	121.674	0.221919	81.4295	0.187194	80.1936		0.0357135	22.7538	0.379565	128.988	0.188141	92.8674
	0.19688	261.608	0.226927	126.682	0.123094	85.8971		0.160681	191.061	0.0221024	12.8042	0.129182	79.159		0.296599	314.138	0.348384	178.234	0.179503	109.762		0.149523	196.272	0.424121	155.624	0.149961	64.2431		0.196592	125.253	0.271478	92.2569	0.231933	114.483
	0.0156994	20.8609	0.179903	100.431	0.1598	111.511		0.12549	149.216	0.038195	22.1268	0.118572	72.6575		0.00116656	1.23554	0.187541	95.9463	0.249012	152.266		0.0794678	104.314	0.263763	96.7835	0.160595	68.7987		0.145462	92.6766	0.306497	104.158	0.20649	101.925
	0.00722563	9.60119	0.128276	71.61	0.208876	145.757		0.342321	407.043	0.134141	77.7093	0.168725	103.39		0.00965647	10.2275	0.303732	155.39	0.112837	68.9974		0.184347	241.984	0.246615	90.4913	0.237441	101.719		0.170956	108.919	0.254064	86.3391	0.280995	138.701
	0.454382	603.769	0.1308	73.019	0.168006	117.237		0.0741229	88.1373	0.433534	251.151	0.155989	95.5856		0.0549843	58.2358	0.149895	76.6866	0.175461	107.291		0.104365	136.995	0.195947	71.8995	0.0831889	35.638		0.0901069	57.4088	0.377816	128.394	0.166635	82.2519
	0.125877	167.261	0.164366	91.7572	0.176014	122.826		0.33712	400.859	0.24263	140.558	0.140047	85.8168		0.0577617	61.1775	0.160991	82.3633	0.158863	97.1413		0.00163639	2.14801	0.200468	73.5584	0.0939769	40.2596		0.586533	373.691	0.361135	122.725	0.18052	89.1056
	0.0035353	4.6976	0.132153	73.7743	0.207161	144.561		0.0308483	36.6808	0.0825084	47.798	0.0905013	55.4566		0.186092	197.097	0.253427	129.654	0.0941864	57.593		0.00579377	7.60521	0.189205	69.4256	0.350029	149.952		0.428551	273.038	0.352701	119.859	0.231456	114.248
	0.0165625	22.0077	0.192409	107.412	0.153723	107.271		0.00987527	11.7424	0.30601	177.275	0.0870463	53.3395		0.179285	189.887	0.206479	105.635	0.142305	87.0165		0.0594302	78.0113	0.221456	81.2596	0.100239	42.9422		0.775451	494.055	0.61598	209.33	0.252184	124.479
	0.0900859	119.703	0.16991	94.8521	0.133713	93.3072		0.00924948	10.9983	0.201216	116.567	0.0599747	36.7508		0.250292	265.093	0.23046	117.904	0.255979	156.526		0.056163	73.7226	0.158398	58.1215	0.143208	61.3501		0.425089	270.832	0.377424	128.261	0.0501913	24.7747
	0.568111	754.888	0.143587	80.1573	0.292752	204.287		0.0201743	23.9886	0.271136	157.072	0.113655	69.6445		0.0444225	47.0494	0.210221	107.549	0.178418	109.099		0.0321842	42.2467	0.1464	53.7191	0.15562	66.6674		0.436672	278.212	0.337474	114.684	0.158333	78.154
	0.0583768	77.5693	0.157358	87.845	0.245433	171.267		0.202428	240.701	0.14589	84.5156	0.0921625	56.4745		0.0826083	87.4934	0.244367	125.019	0.139867	85.5257		0.564008	740.347	0.165583	60.7579	0.115136	49.3241		0.116788	74.4079	0.378929	128.772	0.317556	156.747
	0.050018	66.4623	0.0218568	12.2015	0.157211	109.705		0.360751	428.958	0.194469	112.658	0.122024	74.7728		0.015771	16.7036	0.123768	63.3199	0.300074	183.489		0.0309526	40.63	0.638102	234.141	0.150446	64.4508		0.356387	227.061	0.404651	137.513	0.224801	110.963
	0.103496	137.522	0.171226	95.5868	0.143304	100		0.068477	81.4239	0.163027	94.4433	0.0290152	17.7797		0.0576219	61.0294	0.216648	110.838	0.227553	139.144		0.0104553	13.7242	0.28062	102.969	0.319865	137.03		0.1795	114.363	0.386799	131.447	0.124854	61.6286
	0.124345	165.226	0.187072	104.433	0.133926	93.4559		0.0083967	9.98426	0.221451	128.289	0.129252	79.2019		0.234397	248.258	0.157858	80.7604	0.256315	156.731		0.0181196	23.7848	0.158567	58.1835	0.0396614	16.9909		0.0352919	22.4851	0.47485	161.369	0.182274	89.9714
	0.0646331	85.8824	0.310764	173.484	0.319652	223.059		0.0738214	87.7787	0.231153	133.909	0.138523	84.8829		0.00442113	4.68257	0.189218	96.8043	0.163538	100		0.246362	323.388	0.26319	96.5732	0.40984	175.575		0.0339148	21.6078	0.326259	110.873	0.310047	153.041
	0.0222809	29.6062	0.255457	142.609	0.0930509	64.9325		0.0510535	60.7061	0.263472	152.632	0.104481	64.023		0.00574416	6.08384	0.155291	79.4472	0.261593	159.959		0.00639137	8.38966	0.262915	96.4723	0.369473	158.282		0.800629	510.096	0.619897	210.661	0.344928	170.258
	0.0796162	105.792	0.160352	89.5164	0.175455	122.436		0.0218659	26.0001	0.335109	194.132	0.0756229	46.3395		0.030979	32.811	0.276851	141.637	0.273944	167.511		0.122736	161.11	0.388285	142.475	0.0416601	17.8471		0.0464607	29.601	0.520792	176.982	0.0925779	45.6969
	0.0757513	100.656	0.129393	72.2335	0.17008	118.685		0.103699	123.305	0.389826	225.83	0.115966	71.0606		0.0704483	74.6143	0.531162	271.743	0.301299	184.238		0.0117998	15.4891	0.308701	113.273	0.618414	264.928		0.547793	349.009	0.273388	92.906	0.173207	85.4959
	0.10822	143.799	0.156037	87.1075	0.163348	113.987		0.172618	205.255	0.296094	171.53	0.375076	229.836		0.0510306	54.0483	0.257736	131.858	0.442814	270.771		0.0558179	73.2696	0.52008	190.835	0.420264	180.04		0.199796	127.294	0.159808	54.3079	0.148432	73.2668
	0.0318897	42.374	0.136451	76.1736	0.155821	108.735		0.00588547	6.99823	0.225482	130.624	0.112741	69.0845		0.0110023	11.6529	0.17645	90.2721	0.286682	175.3		0.179428	235.527	0.184657	67.7568	0.380159	162.86		0.233483	148.757	0.251558	85.4875	0.328664	162.23
	0.0403876	53.6658	0.142274	79.4243	0.150502	105.023		0.162315	193.004	0.339789	196.843	0.0709052	43.4487		0.0445112	47.1434	0.279982	143.239	0.164578	100.636		0.100105	131.403	0.331343	121.581	0.240908	103.205		0.736387	469.166	0.564171	191.723	0.207208	102.279
	0.0472289	62.7563	0.0293755	16.3988	0.118883	82.9586		0.00763625	9.08003	0.150476	87.1723	0.143994	88.2354		0.451021	477.692	0.129123	66.0596	0.28213	172.516		0.290377	381.164	0.317732	116.586	0.256408	109.845		0.538904	343.346	0.29294	99.5504	0.32915	162.47
	0.0157098	20.8747	0.155533	86.8262	0.160807	112.214		0.0712645	84.7384	0.00532644	3.08566	0.1181	72.3683		0.28931	306.418	0.107956	55.2305	0.130922	80.056		0.101192	132.83	0.255504	93.753	0.337887	144.75		0.347216	221.218	0.286584	97.3904	0.25725	126.98
	0.0110081	14.6272	0.328577	183.428	0.174391	121.693		0.0315343	37.4965	0.0692111	40.0947	0.160777	98.5195		0.0216554	22.936	0.178624	91.3844	0.16295	99.6405		0.010874	14.2738	0.596594	218.91	0.353006	151.227		0.137212	87.4204	0.240105	81.5954	0.205261	101.318
	0.108272	143.868	0.183514	102.447	0.139473	97.3267		0.222725	264.835	0.10088	58.4408	0.121774	74.6196		0.0360284	38.1589	0.263538	134.827	0.186336	113.94		0.175037	229.763	0.193671	71.0644	0.596064	255.353		0.169921	108.26	0.254759	86.5753	0.206129	101.746
	0.0430999	57.2698	0.262241	146.396	0.185915	129.735		0.0217302	25.8387	0.169173	98.0037	0.0851835	52.198		0.114684	121.466	0.244111	124.888	0.341812	209.011		0.528354	693.546	0.299492	109.894	0.40656	174.17		0.766728	488.497	0.357674	121.549	0.271179	133.855
	0.00468254	6.22201	0.144553	80.6966	0.131378	91.6778		0.180552	214.689	0.237684	137.693	0.0995147	60.9798		0.273153	289.306	0.523684	267.918	0.1011	61.8205		0.0788374	103.486	0.198945	72.9996	0.370887	158.887		0.154351	98.34	0.269044	91.4298	0.336593	166.144
	0.125763	167.11	0.0616149	34.3965	0.0479903	33.4885		0.405338	481.975	0.17999	104.27	0.148268	90.8544		0.15617	165.405	0.232058	118.721	0.195593	119.601		0.0500349	65.6785	0.246376	90.4036	0.284193	121.748		0.0309518	19.72	0.288341	97.9875	0.18992	93.7455
	0.00457038	6.07298	0.0536456	29.9476	0.156773	109.399		0.15813	188.028	0.0453867	26.293	0.105676	64.7552		0.457532	484.588	0.168151	86.0264	0.174531	106.722		0.0257133	33.7527	0.338766	124.305	0.23595	101.081		0.0275484	17.5516	0.5537	188.165	0.188339	92.9651
	0.332583	441.926	0.205419	114.675	0.0640323	44.6828		0.130811	155.543	0.181543	105.17	0.247926	151.922		0.0360061	38.1353	0.636748	325.761	0.109934	67.2223		0.142939	187.629	0.154279	56.6101	0.349852	149.876		0.143987	91.7369	0.457543	155.488	0.201512	99.4674
	0.0351588	46.7179	0.043703	24.3972	0.0848248	59.1922		0.137028	162.936	0.211501	122.525	0.316114	193.706		0.0728589	77.1674	0.0244798	12.5239	0.118169	72.2578		0.113118	148.485	0.231534	84.9576	0.324237	138.903		0.0312808	19.9296	0.294638	100.127	0.230137	113.597
	0.117569	156.222	0.170035	94.9219	0.0883739	61.6688		0.153112	182.061	0.188116	108.978	0.305264	187.057		0.00654618	6.93329	0.39945	204.359	0.0855635	52.3203		0.0281228	36.9155	0.276825	101.576	0.0883309	37.8408		0.110913	70.6648	0.239955	81.5444	0.160661	79.3031
	0.0463929	61.6454	0.109989	61.4013	0.200844	140.152		0.00602229	7.16092	0.192969	111.789	0.167141	102.419		0.00552168	5.84821	0.178644	91.3946	0.121447	74.2623		0.0811185	106.481	0.323384	118.66	0.296453	127		0.874847	557.382	0.153977	52.3263	0.11769	58.0924
	0.276349	367.204	0.0742468	41.4482	0.137131	95.6924		0.0241169	28.6767	0.204815	118.651	0.183476	112.429		0.115324	122.144	0.173065	88.5404	0.100108	61.2139		0.116117	152.421	0.186332	68.3714	0.241867	103.615		0.0995773	63.4426	0.168413	57.2321	0.158249	78.1126
	0.0140265	18.638	0.0998235	55.7264	0.048141	33.5936		0.051051	60.7032	0.0213416	12.3634	0.135637	83.1145		0.172799	183.018	0.189636	97.0181	0.0472755	28.908		0.0954448	125.286	0.330791	121.378	0.359737	154.111		0.0803227	51.1751	0.281652	95.7144	0.296147	146.18
	0.141544	188.079	0.117087	65.3637	0.114287	79.7514		0.0901264	107.167	0.268032	155.274	0.398146	243.972		0.0894331	94.7217	0.177936	91.0324	0.110939	67.8368		0.39878	523.46	0.267561	98.1771	0.227206	97.3347		0.248156	158.105	0.177135	60.1962	0.190645	94.1034
	0.0269535	35.815	0.161029	89.8943	0.0902138	62.9527		0.0682828	81.193	0.293758	170.177	0.231147	141.64		0.277545	293.958	0.403613	206.489	0.0777369	47.5345		0.0116905	15.3456	0.56921	208.862	0.286148	122.585		0.645435	411.219	0.223874	76.0796	0.141891	70.0382
	0.00486886	6.46959	0.16148	90.1461	0.30535	213.078		0.184378	219.238	0.205788	119.215	0.124288	76.1601		0.125673	133.105	0.107129	54.8074	0.100845	61.6646		0.0536944	70.4822	0.271646	99.676	0.0223033	9.5547		0.223856	142.623	0.0920275	31.2739	0.181666	89.6713
	0.0843497	112.081	0.144466	80.648	0.0698493	48.742		0.104684	124.477	0.0754604	43.715	0.21552	132.064		0.0179729	19.0357	0.289975	148.352	0.0817714	50.0015		0.040146	52.6978	0.301998	110.813	0.337918	144.764		0.525368	334.722	0.233331	79.2934	0.157265	77.6268
	0.116312	154.552	0.018717	10.4487	0.150775	105.213		0.17043	202.653	0.202017	117.031	0.319543	195.807		0.247331	261.957	0.0654152	33.4665	0.128865	78.7982		0.17064	223.991	0.41103	150.821	0.249209	106.761		0.0417753	26.6158	0.248485	84.4432	0.156794	77.3944
	0.200501	266.419	0.100336	56.0125	0.0791604	55.2395		0.0319666	38.0105	0.0554146	32.1023	0.118655	72.7084		0.104049	110.202	0.0405751	20.7583	0.198037	121.095		0.361051	473.935	0.325599	119.473	0.270249	115.774		0.0419376	26.7193	0.477896	162.404	0.113491	56.0198
	0.0340878	45.2948	0.250363	139.765	0.0593017	41.3817		0.0519683	61.7939	0.0815614	47.2494	0.254356	155.862		0.16124	170.775	0.235384	120.423	0.0645416	39.4658		0.250913	329.362	0.26166	96.0118	0.425663	182.353		0.0880276	56.0841	0.0804899	27.353	0.103845	51.2584
	0.0490273	65.1459	0.156052	87.1159	0.0711098	49.6216		0.366931	436.306	0.0875544	50.7212	0.280363	171.798		0.0999533	105.864	0.204328	104.535	0.0484169	29.6059		0.00655399	8.60312	0.212052	77.809	0.315385	135.11		0.104554	66.6134	0.289656	98.4344	0.257152	126.932
	0.0241638	32.1081	0.23579	131.63	0.240214	167.625		0.0102093	12.1396	0.207326	120.106	0.345137	211.49		0.309828	328.15	0.171395	87.686	0.188621	115.338		0.00721408	9.46959	0.321172	117.849	0.0679826	29.1236		0.0368618	23.4854	0.218545	74.2686	0.196394	96.9411
	0.0829804	110.262	0.0987147	55.1074	0.111901	78.0864		0.133617	158.88	0.122517	70.9754	0.0295712	18.1204		0.193176	204.6	0.0966936	49.4686	0.0558768	34.1675		0.0714732	93.8196	0.376825	138.27	0.401209	171.877		0.152754	97.3225	0.142343	48.3727	0.0925933	45.7045
	0.230208	305.893	0.388878	217.091	0.133582	93.2158		0.196697	233.886	0.217985	126.281	0.231687	141.971		0.144522	153.068	0.314123	160.706	0.103742	63.436		0.548062	719.416	0.326215	119.699	0.0199978	8.56703		0.104061	66.2993	0.313845	106.655	0.430291	212.394
	0.035388	47.0225	0.0946611	52.8445	0.0444295	31.0037		0.0313492	37.2764	0.109397	63.3748	0.0161543	9.89889		0.052334	55.4288	0.29069	148.718	0.0850249	51.9909		0.00169766	2.22844	0.317529	116.512	0.0838605	35.9257		0.037297	23.7626	0.30615	104.04	0.360841	178.113
	0.00932229	12.3872	0.334347	186.649	0.065255	45.5361		0.0334451	39.7685	0.0730646	42.3271	0.222826	136.541		0.137057	145.162	0.124068	63.4734	0.23752	145.238		0.0494972	64.9727	0.226772	83.2102	0.159132	68.1719		0.0469113	29.8881	0.269449	91.5674	0.0611818	30.1997
	0.00422042	5.60796	0.0815038	45.4994	0.0393711	27.4738		0.155461	184.854	0.0853973	49.4716	0.256141	156.956		0.114564	121.339	0.262183	134.133	0.108895	66.587		0.164238	215.588	0.563933	206.926	0.0545212	23.3568		0.0276833	17.6376	0.282443	95.9832	0.542075	267.571
	0.0468428	62.2432	0.141415	78.9448	0.075527	52.704		0.178658	212.437	0.0560776	32.4863	0.249444	152.852		0.0165557	17.5347	0.205118	104.939	0.0800106	48.9248		0.274968	360.938	0.244614	89.7571	0.0561804	24.0676		0.205444	130.892	0.300582	102.147	0.113591	56.0691
	0.019049	25.3117	0.0272038	15.1865	0.0472299	32.9578		0.431917	513.579	0.071236	41.2678	0.226286	138.662		0.027857	29.5043	0.179963	92.0694	0.140825	86.1115		0.0653035	85.7209	0.169227	62.095	0.050856	21.7866		0.0439324	27.9902	0.256174	87.0561	0.0829534	40.9462
	0.225022	299.002	0.504634	281.711	0.0226638	15.8152		0.0965532	114.808	0.0869347	50.3622	0.178362	109.295		0.0104637	11.0825	0.104979	53.7075	0.262623	160.588		0.542282	711.829	0.306225	112.364	0.375898	161.034		0.48754	310.621	0.323121	109.807	0.0954778	47.1284
	0.0918327	122.024	0.116117	64.8222	0.0978787	68.3014		0.0037904	4.50705	0.1779	103.059	0.0995266	60.9871		0.146169	154.813	0.15344	78.5002	0.119373	72.994		0.0675132	88.6215	0.206725	75.8543	0.298938	128.065		0.722928	460.591	0.473961	161.067	0.0783081	38.6533
	0.074764	99.3441	0.117762	65.7405	0.0410123	28.6191		0.0166159	19.7575	0.134297	77.7997	0.215764	132.214		0.287148	304.129	0.125542	64.2275	0.0664083	40.6073		0.00369361	4.84843	0.346946	127.306	0.0387847	16.6153		0.0503512	32.0797	0.195925	66.5816	0.071224	35.1565
	0.279201	370.994	0.186415	104.066	0.0894078	62.3903		0.596184	708.904	0.0471998	27.3433	0.256517	157.186		0.194983	206.513	0.111956	57.2769	0.129717	79.3192		0.0339045	44.5049	0.700928	257.194	0.110056	47.1478		0.223716	142.534	0.326264	110.875	0.225741	111.427
	0.157923	209.843	0.0513538	28.6682	0.111296	77.6643		0.0482817	57.4103	0.0445734	25.8218	0.168468	103.232		0.217886	230.771	0.323972	165.745	0.110516	67.5782		0.00413968	5.43397	0.195481	71.7285	0.378664	162.219		0.713963	454.88	0.19279	65.5162	0.277678	137.063
	0.0894878	118.909	0.165736	92.522	0.225043	157.039		0.0870877	103.553	0.348812	202.07	0.335876	205.815		0.036279	38.4244	0.137935	70.5678	0.0965421	59.0334		0.170372	223.639	0.281549	103.31	0.283738	121.553		0.0952792	60.7042	0.276869	94.089	0.260982	128.822
	0.0157204	20.8888	0.17836	99.5693	0.0678251	47.3295		0.0811111	96.4467	0.362679	210.104	0.17201	105.403		0.0895259	94.82	0.173435	88.7297	0.094286	57.6539		0.0485848	63.775	0.19625	72.0107	0.368369	157.809		0.486139	309.728	0.442455	150.36	0.204192	100.79
	0.0761995	101.252	0.203783	113.762	0.174016	121.431		0.395428	470.191	0.381937	221.26	0.224015	137.27		0.0993074	105.18	0.269764	138.012	0.36948	225.929		0.266361	349.64	0.339653	124.63	0.193734	82.9954		0.123691	78.8059	0.282429	95.9784	0.290284	143.286
	0.376391	500.137	0.141442	78.9599	0.166762	116.369		0.0691638	82.2405	0.103001	59.6696	0.144051	88.2703		0.0384739	40.7491	0.351209	179.679	0.0677127	41.4049		0.166186	218.145	0.26256	96.342	0.219058	93.8441		0.587326	374.197	0.551009	187.251	0.204091	100.74
	0.0992044	131.82	0.171903	95.9647	0.178759	124.741		0.14885	176.993	0.234859	136.056	0.229952	140.908		0.231452	245.139	0.144552	73.9531	0.107346	65.6398		0.0402564	52.8427	0.274294	100.648	0.136549	58.4974		0.0981217	62.5152	0.457384	155.434	0.142468	70.323
	0.107459	142.788	0.271364	151.489	0.179372	125.169		0.0393968	46.8455	0.0461615	26.7418	0.244258	149.674		0.101662	107.674	0.172211	88.1035	0.0989756	60.5215		0.142993	187.7	0.31878	116.971	0.499363	213.926		0.0948715	60.4445	0.260217	88.4301	0.326203	161.016
	0.441725	586.95	0.151315	84.4715	0.0355363	24.7978		0.0161873	19.2478	0.190735	110.495	0.178192	109.191		0.0635133	67.2692	0.195241	99.8857	0.0615576	37.6412		0.620011	813.86	0.337853	123.97	0.189798	81.3092		0.147549	94.0063	0.471918	160.373	0.209576	103.448
	0.0508369	67.5505	0.20106	112.242	0.173944	121.381		0.2317	275.507	0.203012	117.607	0.269034	164.856		0.0594064	62.9194	0.168182	86.0422	0.0935192	57.185		0.0985192	129.322	0.542952	199.227	0.299167	128.163		0.276074	175.892	0.213627	72.5973	0.203084	100.243
	0.539824	717.301	0.170929	95.421	0.216211	150.876		0.00788579	9.37675	0.248679	144.062	0.441606	270.604		0.334375	354.148	0.13233	67.7003	0.108233	66.1822		0.143384	188.214	0.32521	119.33	0.292826	125.446		0.316448	201.615	0.486108	165.195	0.273108	134.808
	0.0285991	38.0016	0.357467	199.556	0.101757	71.0078		0.0534049	63.5021	0.0978887	56.708	0.238959	146.427		0.0844236	89.416	0.0722173	36.9465	0.128597	78.6343		0.445845	585.24	0.24104	88.4456	0.181228	77.6378		0.740105	471.535	0.279854	95.1034	0.207283	102.316
	0.0401027	53.2872	0.222022	123.944	0.199378	139.129		0.135443	161.051	0.138645	80.3185	0.163193	100		0.0178131	18.8665	0.489532	250.445	0.477243	291.824		0.122664	161.015	0.284853	104.522	0.166005	71.1163		0.0355551	22.6528	0.327368	111.25	0.623876	307.949
	0.149376	198.486	0.167839	93.696	0.162886	113.665		0.254171	302.227	0.172619	100	0.264058	161.807		0.128976	136.603	0.203717	104.222	0.190913	116.739		0.030791	40.4179	0.526436	193.167	0.324463	138.999		0.536445	341.779	0.345112	117.28	0.552531	272.732
	0.0266663	35.4333	0.423349	236.334	0.112322	78.3802		0.198612	236.163	0.041584	24.09	0.0945999	57.9681		0.00568251	6.01855	0.180647	92.4193	0.20993	128.368		0.0358897	47.1108	0.243431	89.323	0.187226	80.2073		0.684774	436.283	0.299045	101.625	0.151921	74.989
	0.212515	282.383	0.249847	139.477	0.209609	146.269		0.0490923	58.3741	0.170478	98.7597	0.210624	129.064		0.0944167		0.144387	73.8687	0.315289	192.793		0.0138623	18.1964	0.277544	101.84	0.462405	198.094		0.229946	146.503	0.321028	109.096	0.241605	119.258
	0.0629176	83.6029	0.224973	125.591	0.180625	126.043		0.0386481	45.9553	0.242043	140.218	0.159253	97.5857		0.0964931	105.303	0.201305	102.988	0.121921	74.5521		0.00320008	4.2006	0.400697	147.029	0.144844	62.051		0.598324	381.204	0.343346	116.68	0.162028	79.9779
	0.135322	179.812	0.222239	124.065	0.131455	91.7316		0.0840994		0.122399	70.907	0.180109	110.366		0.0161046	17.5749	0.1391	71.1638	0.210348	128.623		0.0949268	124.606	0.239512	87.885	0.229399	98.2742		0.0980705	62.4826	0.226535	76.9839	0.215365	106.305
	0.26342	350.024	0.403629	225.326	0.0923155	64.4193		0.0833187	38.6312	0.244758	141.791	0.275039	168.536		0.172946	188.736	0.20441	104.577	0.164848	100.801		0.0563505	73.9687	0.243485	89.3428	0.181433	77.7256		0.0385952	24.5897	0.341769	116.144	0.266584	131.587
	0.0228782	30.3998	0.299196	167.026	0.27183	189.688		0.241396	111.925	0.376662	218.204	0.211993	129.903		0.0789294	86.1356	0.300694	153.836	0.210677	128.824		0.0439728	57.7211	0.227506	83.4796	0.31229	133.785		0.224417	142.98	0.294263	100	0.29391	145.076
	0.187367	248.967	0.141931	79.2329	0.143304			0.290724	134.796	0.322395	186.767	0.183035	112.159		0.157048	171.386	0.161214	82.4774	0.329227	201.315		0.0208682	27.3927	0.215771	79.1736	0.533988	228.76		0.201915	128.644	0.355577	120.836	0.275846	136.159
	0.18082	240.268	0.164026	91.5674	0.138721	61.1048		0.0574146	26.6206	0.0612996	35.5115	0.16038	98.2763		0.214769	234.377	0.158984	81.3365	0.211235	129.166		0.177305	232.74	0.141089	51.7703	0.154939	66.3756		0.939673	598.684	0.265312	90.1615	0.27567	136.072
	0.0507192	67.3941	0.171691	95.8463	0.168942	74.4167		0.118833	55.0975	0.110168	63.8215	0.121667	74.5541		0.00343281	3.74622	0.203415	104.067	0.180869	110.598		0.122002	160.146	0.201859	74.0688	0.236185	101.181		0.0337974	21.533	0.300188	102.014	0.228715	112.895
	0.302064	401.373	0.382275	213.405	0.141179	62.1875		0.086624	40.1637	0.097967	56.7533	0.172566	105.744		0.267152	291.543	0.162347	83.057	0.238981	146.132		0.0735257	96.5138	0.338573	124.234	0.127621	54.6726		0.102672	65.4143	0.303936	103.287	0.10825	53.4328
	0.010862	14.4331	0.203263	113.471	0.344591	151.788		0.020305	9.41452	0.204352	118.383	0.129627	79.4317		0.00975851	10.6495	0.180854	92.5252	0.201557	123.248		0.0296996	38.9853	0.112038	41.1105	0.305066	130.69		0.0434366	27.6743	0.239938	81.5386	0.188726	93.1562
	0.518835	689.412	0.292744	163.424	0.148465	65.3969		0.337652	156.554	0.210355	121.861	0.268405	164.471		0.0256196	27.9586	0.211843	108.379	0.271123	165.786		0.0761816		0.225763	82.84	0.164776	70.5898		0.131699	83.908	0.452202	153.673	0.249955	123.379
	0.172913	229.761	0.163968	91.535	0.154281	67.9588		0.0687413	31.8723	0.168327	97.5136	0.329977	202.2		0.0296199	32.3242	0.167425	85.6549	0.192981	118.004		0.0191856	23.4122	0.352397	129.306	0.235514	100.894		0.159562	101.66	0.255172	86.7156	0.145699	71.9178
	0.301181	400.2	0.166575	92.9903	0.197237	86.8803		0.450684	208.962	0.184159	106.685	0.190983	117.029		0.0542631	59.2173	0.0966806	49.462	0.33067	202.198		0.404919	494.124	0.40191	147.474	0.114825	49.1909		0.0606581	38.6464	0.243681	82.8106	0.106745	52.6899
	0.0479292	63.6868	0.240852	134.455	0.208329	91.7662		0.163085	75.6152	0.161105	93.3298	0.214723	131.576		0.016953	18.5008	0.206122	105.452	0.21483	131.364		0.178382	217.68	0.260718	95.6661	0.230475	98.7352		0.359423	228.995	0.300239	102.031	0.188552	93.0703
	0.131432	174.643	0.142916	79.7827	0.179004	78.8489		0.0894011	41.4513	0.065054	37.6865	0.116056	71.1158		0.0168358	18.3729	0.671445	343.513	0.202916	124.079		0.641212	782.473	0.294698	108.135	0.125098	53.5918		0.201594	128.439	0.390809	132.809	0.101046	49.8768
	0.0365504	48.567	0.284859	159.022	0.262636	115.688		0.390437	181.028	0.0379984	22.0129	0.314732	192.859		0.00491937	5.3685	0.0999638	51.1417	0.163445	99.9431		0.00457895	5.5877	0.312854	114.797	0.204573	87.6388		0.0821091	52.3133	0.216428	73.5492	0.118717	58.5993
	0.0752576		0.493693	275.604	0.258547	113.887		0.0487356	22.5965	0.143257	82.9903	0.105869	64.8735		0.0707032	77.1583	0.0436778	22.3456	0.319362	195.283		0.240127	293.028	0.233812	85.7934	0.277939	119.069		0.767458	488.962	0.266939	90.7144	0.209494	103.407
	0.539776	695.663	0.3227	180.147	0.282309	124.353		0.237257	110.005	0.183404	106.248	0.223821	137.151		0.0771667	84.212	0.152726	78.1349	0.123465	75.4962		0.298114	363.789	0.230721	84.6592	0.187515	80.3312		0.268533	171.088	0.430062	146.149	0.319487	157.7
	0.0389619	50.2141	0.244122	136.281	0.332579	146.497		0.0412059	19.1053	0.184467	106.864	0.167086	102.386		0.148689	162.264	0.169613	86.7743	0.173828	106.292		0.0239971	29.2837	0.253007	92.8367	0.301781	129.283		0.0458096	29.1862	0.281604	95.6981	0.110924	54.7527
	0.182997	235.846	0.206163	115.09	0.416167	183.316		0.336065	155.818	0.0915474	53.0344	0.223809	137.144		0.220856	241.02	0.191762	98.1058	0.24517	149.916		0.0108616	13.2544	0.247047	90.6498	0.0874085	37.4457		0.836019	532.644	0.272461	92.591	0.0330384	16.3079
	0.0562123	72.4464	0.587935	328.214	0.268647	118.335		0.387688	179.754	0.367207	212.727	0.0116098	7.11415		0.422387	460.951	0.201263	102.967	0.237621	145.3		0.0340607	41.5644	0.854803	313.656	0.216392	92.702		0.034158	21.7627	0.283571	96.3665	0.2339	115.454
	0.318076	409.936	0.373777	208.661	0.242552	106.841		0.270728	125.524	0.464942	269.346	0.163193			0.0135855	14.8258	0.25462	130.264	0.15313	93.6357		0.275403	336.075	0.308879	113.338	0.091221	39.0789		0.0309411	19.7132	0.245675	83.4882	0.143242	70.705
	0.0324118	41.7723	0.248883	138.939	0.403365	177.677		0.351815	163.121	0.0794952	46.0524	0.181538	82.7746		0.0185744	20.2702	0.288653	147.675	0.226632	138.581		0.712847	869.889	0.217585	79.8392	0.114986	49.2598		0.0366647	23.3598	0.300293	102.049	0.0701789	34.6407
	0.201942	260.263	0.193189	107.848	0.172143	75.8267		0.329358	152.709	0.306421	177.513	0.200202	91.2847		0.0676935	73.8739	0.19502	99.7726	0.114014	69.7171		0.260634	318.052	0.404988	148.604	0.155651	66.6807		0.457608	291.551	0.278534	94.6548	0.124515	61.4613
	0.177187	228.358	0.256428	143.151	0.324015	142.724		0.35342	163.865	0.191614	111.004	0.157185	71.6706		0.0359756	39.2601	0.25798	131.983	0.135855	83.0724		0.0783295	95.5857	0.351886	129.119	0.0773394	33.1321		0.156956		0.20165	68.5271	0.202591	100
	0.0289311	37.2864	0.250141	139.641	0.306046	134.809		0.382165	177.193	0.0904023	52.371	0.150808	68.7629		0.0206145	22.4966	0.195688	100.114	0.164844	100.799		0.041644	50.8183	0.226513	83.1152	0.286081	122.557		0.296514	178.703	0.283486	96.3376	0.142837	70.5051
	0.407846	525.632	0.281421	157.103	0.109812	48.3707		0.0777676	36.0574	0.285491	165.388	0.0701529	31.9871		0.261278	285.132	0.184005	94.1373	0.144372	88.2804		0.0523253	63.8527	0.301442	110.609	0.140697	60.2744		0.0908183	54.7342	0.212769	72.3057	0.280503	138.458
	0.203856	262.729	0.176378	98.4629	0.288289	126.988		0.0627287	29.0845	0.0711679	41.2283	0.294012	134.059		0.0845642	92.2848	0.0361605	18.4998	0.106436	65.0833		0.00551037	6.72432	0.251239	92.188	0.140831	60.3318		0.224179	135.108	0.311035	105.7	0.204858	101.119
	0.012787	16.4799	0.23221	129.631	0.131198	57.791		0.143075	66.3375	0.121757	70.5351	0.239952	109.409		0.300439	327.869	0.347146	177.601	0.162352	99.2748		0.0151782	18.522	0.207314	76.0704	0.142309	60.965		0.0279909	16.8695	0.21849	74.2499	0.102556	50.6222
	0.0404732	52.1618	0.206593	115.33	0.388432	171.099		0.101819	47.2089	0.470684	272.672	0.128175	58.4431		0.15142	165.245	0.334064	170.908	0.180436	110.333		0.00378548	4.61943	0.767625	281.667	0.349637	149.784		0.0193316	11.6507	0.253115	86.0166	0.148289	73.1962
	0.0255308	32.9041	0.129457	72.2693	0.10269	45.2336		0.38609	179.013	0.679611	393.706	0.166504	75.9197		0.6855	748.086	0.259777	132.902	0.210729	128.856		0.135756	165.663	0.148198	54.3788	0.373471	159.994		0.905015	545.433	0.219108	74.4599	0.102903	50.7935
	0.114838	148.003	0.253855	141.714	0.134101	59.0697		0.252668	117.151	0.150863	87.3965	0.250834	114.371		0.131593	143.607	0.223823	114.508	0.197247	120.612		0.0154392	18.8405	0.250864	92.0504	0.779618	333.987		0.236143	142.318	0.347531	118.102	0.18698	92.2943
	0.0132389	17.0623	0.258755	144.45	0.150358	66.2307		0.374597	173.684	0.0531658	30.7995	0.238303	108.657		0.0502107	54.7949	0.11968	61.2285	0.150325	91.9205		0.00288857	3.52493	0.316441	116.113	0.314454	134.712		0.374129	225.479	0.302826	102.91	0.185946	91.7839
	0.331077	426.692	0.240151	134.064	0.259416	114.269		0.31695	146.956	0.200799	116.325	0.264167	120.45		0.44126	481.547	0.0881792	45.1126	0.224716	137.409		0.256309	312.774	0.252367	92.6019	0.217508	93.1801		0.185827	111.994	0.230147	78.2113	0.313443	154.717
	0.0560968	72.2975	0.304246	169.845	0.187538	82.608		0.210509	97.6036	0.526122	304.788	0.240654	109.729		0.2273	248.052	0.236104	120.791	0.144302	88.2376		0.104683	127.745	0.207028	75.9655	0.0812914	34.8251		0.131741	79.3974	0.315398	107.182	0.255263	125.999
	0.0289001	37.2464	0.221831	123.837	0.231994	102.19		0.297376	137.88	0.334874	193.996	0.226299	103.184		0.163395	178.313	0.140023	71.636	0.0750346	45.8821		0.0598096	72.9858	0.348099	127.729	0.480198	205.716		0.26524	159.854	0.297528	101.11	0.134704	66.4906
	0.0432768	55.7751	0.262307	146.433	0.19352	85.243		0.401083	185.964	0.132529	76.7754	0.158145	72.1083		0.0429252	46.8442	0.220275	112.693	0.0867059	53.0188		0.0517519	63.153	0.306714	112.544	0.10238	43.8594		0.247364	149.081	0.413273	140.443	0.253425	125.092
	0.368616	475.072	0.210557	117.543	0.0527762	23.2472		0.121857	56.4996	0.0360691	20.8952	0.172717	78.7526		0.32797	357.913	0.0913466	46.7331	0.139614	85.371		0.0415676	50.725	0.283206	103.918	0.527678	226.056		0.214653	129.367	0.29391	99.88	0.407192	200.992
	0.380426	490.293	0.213402	119.131	0.32808	144.515		0.135586	62.8652	0.214461	124.24	0.120346	54.8733		0.00989746	10.8011	0.263527	134.821	0.138724	84.8268		0.115293	140.692	0.217512	79.8124	0.254481	109.019		0.124028	74.749	0.403898	137.257	0.104784	51.7219
	0.0277284	35.7363	0.240253	134.121	0.165278	72.8028		0.0286646	13.2905	0.0513059	29.722	0.220665	100.615		0.041293	45.063	0.289949	148.338	0.242808	148.472		0.265144	323.556	0.227357	83.4249	0.481562	206.3		0.11664	70.2964	0.104501	35.5128	0.177586	87.6574
	0.378215	487.443	0.251596	140.453	0.153416	67.5777		0.360035	166.932	0.208228	120.629	0.149012	67.944		0.283151	309.002	0.255429	130.678	0.1941	118.688		0.320737	391.396	0.227018	83.3005	0.233428			0.737303	444.357	0.254914	86.6279	0.230192	113.624
	0.103858	133.852	0.175482	97.9627	0.427484	188.301		0.2232	103.488	0.178752	103.553	0.179296	81.7524		0.0408344	44.5625	0.376152	192.44	0.320416	195.928		0.168919	206.132	0.327488	120.166	0.666171	243.113		0.198545	119.659	0.259811	88.2921	0.179759	88.73
	0.0832076	107.238	0.200136	111.726	0.191344	84.2845		0.177212	82.1653	0.0514445	29.8023	0.274411	125.121		0.411882	449.486	0.213358	109.154	0.146217	89.4086		0.034689	42.3311	0.226311	83.0411	0.196587	71.7426		0.57192	344.684	0.22667	77.0297	0.348163	171.855
	0.148166	190.956	0.190887	106.562	0.262199	115.495		0.0299632	13.8926	0.374356	216.868	0.142054	64.7714		0.0656054	71.5951	0.130939	66.9886	0.215579	131.822		0.27081	330.47	0.256608	94.1581	0.38097	139.032		0.223535	134.72	0.15404	52.3477	0.600737	296.527
	0.247554	319.047	0.20587	114.927	0.428025	188.539		0.0207288	9.61102	0.00450158	2.60781	0.0901192	41.091		0.242819	264.988	0.150613	77.0539	0.0969838	59.3035		0.0519483	63.3926	0.284978	104.568	0.352698	128.714		0.0904727	54.5259	0.69162	235.035	0.443399	218.864
	0.0130446	16.8119	0.145882	81.4385	0.303059	133.494		0.393796	182.586	0.142834	82.7452	0.140458	64.0437		0.118045	128.822	0.265766	135.966	0.104371	63.8206		0.019028	23.2199	0.350066	128.451	0.369497	134.845		0.334458	201.571	0.610272	207.39	0.230414	113.734
	0.013781	17.7609	0.218173	121.795	0.332086	146.28		0.168329	78.0466	0.292506	169.452	0.452788	206.455		0.256069	279.448	0.203571	104.147	0.0954011	58.3357		0.14244	173.82	0.406246	149.065	0.335141	122.307		0.0640085	38.5765	0.247044	83.9535	0.187402	92.5026
	0.445865	574.631	0.197694	110.362	0.249458	109.883		0.244002	113.133	0.250069	144.868	0.0648425	29.5658		0.0287409	31.3649	0.264996	135.572	0.107449	65.7028		0.203315	248.106	0.211182	77.4897	0.385192	140.572		0.0279786	16.8621	0.331564	112.676	0.202591
	0.490088	631.625	0.165209	92.2278	0.251479	110.773		0.0323236	14.987	0.16916	97.9962	0.228199	104.05		0.213036	232.486	0.0896517	45.866	0.237566	145.267		0.00515336	6.28866	0.203916	74.8236	0.309419	112.92		0.0490755	29.5767	0.348365	118.386	0.164116	79.6914
	0.0193894	24.989	0.146751	81.9236	0.31511	138.802		0.355616	164.883	0.14041	81.341	0.174471	79.5523		0.128395	140.117	0.352761	180.473	0.163538			0.0135036	16.4785	0.210042	77.0714	0.424023	154.743		0.163811	98.7253	0.270146	91.8043	0.0937873	45.5412
	0.284271	366.368	0.168883	94.2788	0.368595	162.361		0.310449	143.941	0.0623001	36.0911	0.259436	118.293		0.183713	200.486	0.2261	115.673	0.187113	132.925		0.085846	104.758	0.347368	127.461	0.378153	138.003		0.256022	154.299	0.419941	142.709	0.213367	103.607
	0.0482853	62.2301	0.175631	98.0458	0.288534	127.095		0.220604	102.284	0.339543	196.701	0.200206	91.2865		0.0131629	14.3647	0.147559	75.4915	0.110412	78.4368		0.025515	31.136	0.219584	80.5727	0.299662	109.359		0.0876542	52.8273	0.318953	108.39	0.138473	67.2397
	0.0473565	61.033	0.170926	95.4193	0.150795	66.4232		0.141871	65.7792	0.211216	122.36	0.28781	131.231		0.0329898	36.0017	0.292153	149.466	0.43257	307.298		0.286922	350.132	0.127649	46.8387	0.26454	96.5415		0.0661442	39.8637	0.314831	106.99	0.108519	52.6946
	0.301164	388.14	0.185451	103.528	0.307225	135.329		0.138914	64.4082	0.135831	78.6883	0.231916	105.745		0.0254072	27.7269	0.266975	136.585	0.188247	133.731		0.0303626	37.0516	0.0751033	27.5579	0.290799	106.124		0.148181	89.3055	0.229101	77.8559	0.128107	62.2061
	0.0155826	20.0828	0.255515	142.641	0.394626	173.828		0.277899	128.849	0.0642246	37.206	0.156672	71.4366		0.014769	16.1174	0.141485	72.384	0.245228	174.21		0.108039	131.84	0.290478	106.586	0.322644	117.746		0.898027	541.221	0.33135	112.603	0.171921	83.4813
	0.193787	249.753	0.134245	74.9422	0.167308	73.697		0.286137	132.669	0.190832	110.551	0.0433203	19.7525		0.580924	633.962	0.152168	77.8494	0.270715	192.316		0.112014	136.691	0.372232	136.584	0.3899	142.29		0.539587	325.197	0.219462	74.5802	0.173577	84.2854
	0.0673112	86.7506	0.179131		0.364492	160.554		0.0820807	38.0571	0.353592	204.84	0.267545	121.991		0.270581	295.285	0.241358	123.479	0.0726846	51.6352		0.027714	33.8195	0.0820819	30.1186	0.348453	127.165		0.140194	84.4919	0.406069	137.995	0.362937	176.235
	0.0440418	56.761	0.354144	184.06	0.22921	100.964		0.510192	236.553	0.156593	90.716	0.274715	125.26		0.0169753	18.5251	0.241179	123.388	0.0912035	64.7911		0.192185	234.524	0.319674	117.299	0.305953	111.655		0.580691	349.97	0.401163	136.328	0.119131	57.8476
	0.0719756	92.7621	0.137895	71.6684	0.246384	108.529		0.0847528	39.2961	0.131824	76.367	0.314632	143.461		0.0163713	17.866	0.22524	115.233	0.103075	73.2246		0.103506	126.309	0.323121	118.564	0.161475	58.9288		0.538586	324.594	0.238717	81.1237	0.180446	87.6209
	0.252827	325.843	0.149411	77.6536	0.117849	51.9109		0.178623	82.8195	0.172619		0.158663	72.3445		0.15039	164.12	0.291708	149.238	0.237724	168.879		0.165044	201.404	0.303155	111.238	0.407876	148.851		0.229588	138.368	0.281418	95.6349	0.201038	97.6199
	0.159489	205.549	0.230127	119.604	0.2073	91.3129		0.319867	148.308	0.266077	125.522	0.196566	89.6268		0.288076	314.377	0.270173	138.221	0.0885482	62.9048		0.914798	1116.33	0.225134	82.6092	0.288292	105.21		0.423514	255.243	0.211899	72.0101	0.241662	117.346
	0.12957	166.99	0.241148	125.332	0.354546	156.173		0.34286	158.969	0.309759	146.129	0.0737613	33.6324		0.0965363	105.35	0.229132	117.224	0.12672	90.0221		0.0236938	28.9136	0.355009	130.265	0.276329	100.844		0.367292	221.359	0.293669	99.7981	0.177883	86.3763
	0.194859	251.134	0.309812	161.019	0.30035	132.3		0.0465023	21.561	0.249507	117.705	0.110433	50.3534		0.048761	53.2128	0.0380834	19.4835	0.110579	78.5555		0.0669857	81.7428	0.339226	124.473	0.38291	139.74		0.42618	256.849	0.448811	152.52	0.152688	74.1422
	0.0440538	56.7765	0.0945012	49.1153	0.268437	118.243		0.0580751	26.9268	0.245356	115.747	0.108643	49.5372		0.105381	115.002	0.0990805	50.6898	0.105415	74.887		0.184645	225.323	0.341979	125.484	0.232465	84.836		0.122855	74.042	0.310232	105.427	0.31921	155.002
	0.0475536	61.287	0.134427	69.866	0.411492	181.257		0.201305	93.3361	0.269247	127.018	0.0766555	34.9521		0.227698	248.487	0.229089	117.202	0.103721	73.6835		0.174329	212.734	0.0430493	15.7962	0.526523	192.15		0.419616	252.893	0.156528	53.1932	0.159821	77.6058
	0.138505	178.505	0.196894	102.332	0.142272	62.669		0.450631	208.937	0.260602	122.939	0.265986	121.28		0.0141247	15.4143	0.22454	114.875	0.0916134	65.0823		0.246302	300.563	0.511468	187.675	0.342674	125.056		0.288741	174.018	0.300507	102.122	0.141105	68.5177
	0.0216768	27.937	0.195713	101.718	0.382144	168.329		0.446594	207.066	0.359491	169.59	0.315891	144.035		0.127728	139.389	0.2149	109.943	0.116066	82.4534		0.0237555	28.9889	0.157682	57.8588	0.282983	103.272		0.086215	51.9599	0.339953	115.527	0.21697	105.356
	0.0955032	123.084	0.15873	82.497	0.139444	61.4233		0.106914	49.5712	0.266637	125.786	0.259613	118.374		0.0748902	81.7276	0.142618	72.9636	0.1011	71.8216		0.0402729	49.1451	0.272529	100	0.481539	175.733		0.113482	68.3931	0.314666	106.934	0.219836	106.748
	0.354183	456.471	0.214371	111.415	0.218499	96.246		0.39374	182.56	0.311013	146.721	0.374702	170.85		0.304955	332.797	0.176446	90.2701	0.0450863	32.0294		0.0620436	75.712	0.412627	151.407	0.297933	108.728		0.107386	64.7192	0.282195	95.8989	0.125131	60.761
	0.0263076	33.9052	0.26302	136.7	0.160561	70.725		0.080796	37.4615	0.306515	144.599	0.207412	94.5722		0.365267	398.616	0.0794318	40.6375	0.0848822	60.3004		0.0290398	35.4373	0.238351	87.4589	0.159225	58.1077		0.243154	146.544	0.399235	135.673	0.35179	170.822
	0.0170672	21.9962	0.0928576	48.261	0.0709287	31.2432		0.0377017	17.4806	0.287363	135.564	0.219316	100		0.0335916	36.6585	0.156282	79.9542	0.0780788	55.4673		0.0455755	55.6159	0.240155	88.1209	0.280502	102.367		0.324436	195.531	0.339143	115.252	0.220176	106.913
	0.0526072	67.8001	0.246994	128.371	0.148103	65.2374		0.160098	74.2303	0.236583	111.608	0.356383	162.497		0.0409522	44.6911	0.102379	52.3773	0.0583875	41.4786		0.0438761	53.5421	0.305386	112.056	0.361971	132.098		0.169204	101.976	0.326998	111.124	0.128493	62.3936
	0.0692282	89.2213	0.224803	116.837	0.199921	88.0626		0.270518	125.427	0.158976	74.9972	0.245026	111.723		0.0167465	18.2754	0.194903	99.7127	0.0662954	47.0963		0.131933	160.998	0.253553	93.0371	0.233568	85.2385		0.345118	207.995	0.33064	112.362	0.160632	77.9996
	0.03999	51.5391	0.172131	89.4619	0.468822	206.51		0.277339	128.59	0.410367	193.591	0.201313	91.7913		0.0867747	94.6972	0.165341	84.5888	0.237306	168.583		0.115839	141.359	0.317479	116.494	0.126001	45.9829		0.0552307	33.2863	0.328025	111.473	0.250873	121.819
	0.0131572	16.957	0.115421	59.9879	0.243322	107.18		0.0588942	27.3066	0.32395	152.824	0.0321565	14.6622		0.151361	165.18	0.215667	110.336	0.243538	173.01		0.230803	281.649	0.136994	50.2677	0.207354	75.6719		0.115293	69.4846	0.252009	85.6407	0.12261	59.5369
	0.280204	361.127	0.119877	62.3039	0.0399136	17.5814		0.135635	62.8879	0.294195	138.787	0.241133	109.948		0.362695	395.809	0.151858	77.6908	0.0574039	40.7798		0.0128863	15.7252	0.229945	84.3745	0.235745	86.033		0.0826336	49.8015	0.294263		0.233658	113.46
	0.524752	676.3	0.271906	141.318	0.240305	105.851		0.336408	155.977	0.0987721	46.5959	0.262793	119.824		0.48769	532.216	0.124134	63.5072	0.122832	87.26		0.0945747	115.41	0.213877	78.4786	0.275673	100.604		0.253733	152.919	0.486064	146.336	0.184328	89.5059
	0.0775916		0.089469	46.4999	0.0606981	26.7367		0.226768	105.142	0.20234	95.4542	0.213119	97.1744		0.0916339		0.108179	55.3446	0.167282	118.837		0.278466	339.813	0.345057	126.613	0.0932639	34.0358		0.582888	351.294	0.283127	85.2389	0.216025	104.897
	0.0592073	29.5438	0.239327	124.386	0.223898	98.6241		0.0380444	17.6395	0.234154	110.463	0.380818	173.639		0.309402	202.552	0.121449	62.1335	0.11087	78.7622		0.0513115	62.6155	0.329495	120.903	0.21085	76.9478		0.288557	173.907	0.215349	64.8335	0.114416	55.5581
	0.35386	176.572	0.222961	115.88	0.193732	85.3364		0.210751	97.7158	0.445865	210.337	0.381019	173.731		0.0732979	47.9849	0.198421	101.513	0.0427445	30.3658		0.0323768	39.5095	0.30297	111.17	0.285157	104.065		0.682951	411.6	0.310095	93.358	0.0807176	39.1948
	0.272173	135.811	0.4114	213.818	0.348122	153.343		0.235895	109.374	0.281831	132.954	0.276193	125.934		0.505192	330.727	0.195464		0.110353	78.3949		0.307063	374.71	0.364927	133.904	0.0605093	22.0823		0.431689	260.17	0.272518	82.0449	0.18885	91.7017
	0.0459529	22.93	0.163311	84.8779	0.230171	101.387		0.0474495	22.0002	0.417626	197.016	0.169377	77.2297		0.0570511	37.3488	0.186049	91.0692	0.136601	97.0415		0.336654	410.82	0.272529		0.19313	70.481		0.0794635	47.8909	0.27293	82.169	0.401548	194.983
	0.0714958	35.6757	0.323994	168.39	0.347695	153.155		0.274426	127.239	0.202112	95.3466	0.271499	123.794		0.0483239	31.6355	0.334274	163.624	0.0579632	41.1771		0.0511263	62.3895	0.255706	91.8887	0.0305753	11.1582		0.0459746	27.7079	0.275448	82.927	0.175535	85.2362
	0.0439766	21.9439	0.199129	103.494	0.185708	81.8019		0.284401	131.864	0.164207	77.4649	0.236259	107.725		0.154204	100.951	0.22715	111.188	0.0709857	50.4283		0.108526	132.435	0.266832	95.8868	0.455449	166.212		0.165926	100	0.299662	90.217	0.0919269	44.6378
	0.434285	216.704	0.0654443	34.0135	0.260244	114.634		0.0577982	26.7984	0.119146	56.2073	0.197947	90.2565		0.369638	241.986	0.152631	74.7114	0.0784583	55.7369		0.077567	94.6552	0.275168	98.8824	0.169122	61.7195		0.0576194	34.726	0.217691	65.5386	0.283253	137.542
	0.200405	100	0.138312	71.8851	0.280531	123.57		0.157921	73.2209	0.143288	67.5963	0.174508	79.5692		0.00826363	5.40983	0.139663	68.3637	0.0757207	53.7921		0.430544	525.394	0.314071	112.862	0.206973	75.5329		0.0605277	36.4787	0.20855	62.7866	0.309014	150.051
	0.162182	80.9271	0.230782	119.945	0.172574	76.0166		0.253132	117.366	0.285223	134.554	0.189166	86.2527		0.454124	297.295	0.395684	193.684	0.204435	145.231		0.0819469	100	0.241	86.604	0.151823	55.4064		0.129201	77.8666	0.359752	108.308	0.231088	112.212
	0.0858685	42.8475	0.119062	61.8803	0.254488	112.099		0.0196742	9.12205	0.155571	73.3909	0.207565	94.642		0.0366551	23.9965	0.131205	64.2236	0.173893	123.534		0.453701	553.652	0.351946	126.473	0.488129	178.138		0.132351	79.7651	0.248326	74.7616	0.136102	66.0883
	0.468869	233.961	0.151216	78.5917	0.235436	103.706		0.307935	142.776	0.171566	80.9365	0.200268	91.3148		0.301504	197.381	0.0757777	37.0925	0.0522222	37.0987		0.0398939	48.6826	0.231089	83.0425	0.265995	97.0724		0.130024	78.3626	0.200312	60.3064	0.364351	176.921
	0.0647611	32.3151	0.13576	70.5588	0.28567	125.834		0.215677		0.397809	187.667	0.167203	76.2384		0.279637	183.066	0.328609	160.851	0.0915236	65.0185		0.315205	384.645	0.262907	94.4764	0.579196	211.372		0.331189	199.6	0.357555	107.646	0.0870117	42.2511
	0.277021	138.231	0.294159	152.884	0.196232	86.4376		0.132741	65.3552	0.126452	59.6539	0.272282	124.151		0.414094	271.089	0.285189	139.597	0.0691491	49.1236		0.0783147	95.5676	0.340439	122.338	0.342971	125.164		0.287864	173.489	0.324726	97.7628	0.357141	173.42
	0.292694	146.051	0.144316	75.0056	0.224833	99.036		0.533573	262.705	0.435259	205.334	0.165021	75.2435		0.108788	71.2187	0.403429	197.475	0.115331	81.9313		0.0051332	6.26406	0.479416	172.28	0.108206	39.4888		0.0738823	44.5273	0.177249	53.363	0.277266	134.635
	0.557031	277.953	0.196322	102.035	0.194484	85.6677		0.126386	62.2263	0.499926	235.841	0.118847	54.1898		0.42058	275.335	0.318352	155.83	0.143173	101.71		0.0293187	35.7777	0.376842	135.419	0.269536	98.3647		0.20096	121.114	0.366856	110.447	0.291877	141.729
	0.30384	151.613	0.135185	70.2599	0.357006	157.256		0.369086	181.72	0.231247	109.091	0.187044	85.2852		0.0833423	54.5605	0.304543	149.071	0.125156	88.911		0.0614671	75.0085	0.349823	125.71	0.327214	119.414		0.559461	337.175	0.320188	96.3966	0.135832	65.9572
	0.136746	68.2348	0.0620202	32.2339	0.135932	59.8763		0.276625	136.197	0.212243	100.126	0.094295	42.995		0.159937	104.704	0.263877	129.165	0.0489792	34.7949		0.516706	630.538	0.243195	87.3928	0.317005	115.688		0.146937	88.5557	0.233907	70.4206	0.267081	129.689
	0.0448078	22.3586	0.144669	75.1891	0.190886	84.0828		0.598549	294.696	0.111885	52.7819	0.183172	83.5197		0.0687591	45.0136	0.315981	154.67	0.123996	88.0869		0.0984296	120.114	0.165887	59.612	0.191421	69.8573		0.0752354	45.3427	0.299183	90.0728	0.141805	68.8576
	0.122939	61.3453	0.0926943	48.1762	0.16453	72.4733		0.0749876	36.9202	0.156496	73.8272	0.247002	112.624		0.306667	200.761	0.323962	158.576	0.0291947	20.74		0.0819469		0.226959	81.5584	0.275612	100.582		0.563459	339.585	0.321946	96.9259	0.308374	149.74
	0.235733	117.628	0.15701	81.6031	0.264427	116.477		0.0726618	35.7751	0.320755	151.317	0.278851	127.146		0.184306	120.657	0.0757512	37.0795	0.151101	107.342		0.00192111	1.37771	0.191092	68.6695	0.351955	128.443		0.0562642	33.9092	0.612993	184.549	0.137359	66.6987
	0.309658	154.516	0.162166	84.2828	0.118416	52.1607		0.255233	125.664	0.151155	71.3076	0.255339	116.425		0.176735	115.701	0.332749	162.878	0.0935751	66.4759		0.406275	291.357	0.541259	194.503	0.287518	104.927		0.647956	390.509	0.290515	87.4632	0.14391	69.8797
	0.454046	226.564	0.229264	119.156	0.183443	80.8042		0.205035	100.949	0.262187	123.687	0.221034	100.783		0.59885	392.041	0.320538	156.9	0.256689	182.352		0.132981	95.3662	0.273513	98.2877	0.255696	93.3139		0.0408314	24.6082	0.178148	53.6337	0.391951	190.323
	0.334617	166.97	0.111266	57.8285	0.139646	61.5122		0.110472	54.391	0.0884395	41.7215	0.326188	148.73		0.367429	240.54	0.215542	105.506	0.0733485	52.1069		0.247281	177.335	0.418211	150.285	0.247956	90.4893		0.718183	432.833	0.738158	222.232	0.363142	176.334
	0.453823	226.453	0.163778	85.1206	0.178641	78.689		0.25899	127.514	0.709618	334.763	0.547301	249.549		0.303927	198.968	0.240125	117.539	0.063615	45.1922		0.391254	280.584	0.17316	62.2255	0.349575	127.574		0.374284	225.573	0.29545	88.9489	0.141723	68.8178
	0.0349064	17.4179	0.155991	81.0735	0.298173	131.341		0.0749385	36.8961	0.207801	98.0304	0.3175	144.768		0.00883711	5.78527	0.20994	102.764	0.112681	80.0487		0.0734533	52.6764	0.555201	199.513	0.0290817	10.6131		0.0763623	46.0219	0.36119	108.741	0.147408	71.5783
	0.23415	116.838	0.245218	127.448	0.150639	66.3545		0.459784	226.375	0.415614	196.067	0.310978	141.794		0.379017	248.126	0.206203	100.934	0.215651	153.199		0.574048	411.674	0.283043	101.712	0.459536	167.703		0.136516	82.2752	0.191761	57.732	0.442377	214.809
	0.375688	187.464	0.286035	148.661	0.301823	132.949		0.155698	76.6581	0.0947149	44.6819	0.247292	112.756		0.152421	99.7833	0.232857	113.981	0.0608673	43.2402		0.217309	155.841	0.177431	63.7603	0.087441	31.9108		0.0598183	36.0512	0.305662	92.0234	0.343256	166.678
	0.146272	72.9882	0.192407	100	0.152518	67.1822		0.321102	158.095	0.241597	113.974	0.546556	249.209		0.0965546	63.21	0.620994	303.971	0.107678	76.4946		0.231191	165.797	0.361706	129.98	0.233911	85.3637		0.816596	492.145	0.300866	90.5795	0.119527	58.0399
	0.160579	80.1272	0.0894829	46.5071	0.0516986	22.7726		0.267284	131.598	0.211754	99.8953	0.344658	157.151		0.0956086	62.5907	0.115658	56.6135	0.145319	103.235		0.210798	151.172	0.182535	65.5945	0.315141	115.008		0.10398	62.6665	0.367816	110.736	0.202583	98.3702
	0.3569	178.089	0.156585	81.3822	0.0884144	38.9454		0.140814	69.33	0.220202	103.881	0.37624	171.552		0.11063	72.4246	0.324088	158.638	0.113551	80.6668		0.0270085	19.3689	0.282225	101.418	0.26063	95.1145		0.0507218	30.5689	0.295687	89.0203	0.13374	64.9414
	0.472588	235.816	0.223727	116.278	0.176585	77.7834		0.512425	252.293	0.327609	154.55	0.330582	150.733		0.0129791	8.49684	0.302514	148.078	0.101233	71.9161		0.0849781	60.9413	0.304515	109.428	0.308948	112.748		0.374841	225.909	0.281291	84.6862	0.254897	123.773
	0.167377	83.5194	0.247712	128.744	0.261411	115.148		0.252232	124.187	0.288165	135.942	0.266543	121.534		0.0262782	17.2032	0.544416	266.487	0.0835727	59.3702		0.308118	220.964	0.231171	83.072	0.35968	131.262		0.140112	84.4425	0.182595	54.9725	0.12145	58.9736
	0.172874	86.2623	0.306402	159.247	0.122416	53.9226		0.229372	112.932	0.222964	105.184	0.295489	134.732		0.398057	260.59	0.318827	156.063	0.12967	92.1177		0.0134406	9.63881	0.292123	104.975	0.30242	110.365		0.750714	452.439	0.441612	132.953	0.114658	55.6756
	0.13801	68.8655	0.393997	204.773	0.291564	128.43		0.209747	103.269	0.307945	145.274	0.162124	73.9226		0.0195453	12.7954	0.0924112	45.2344	0.0930593	66.1095		0.125876	90.2709	0.40763	146.483	0.209097	76.308		0.118026	71.1317	0.33564	101.049	0.100986	49.0367
	0.128135	63.938	0.519362	269.929	0.227021			0.233389	114.909	0.199503	94.1158	0.265994	121.283		0.0737583	48.2863	0.138551	67.8194	0.117159	83.2299		0.505038	362.184	0.301831	108.464	0.555912	202.875		0.0685754	41.3289	0.699139	210.484	0.128149	62.2265
	0.288432	143.925	0.0798312	41.4908	0.0940103	50.3836		0.2335	114.964	0.276316	130.352	0.371949	169.595		0.106131	69.4793	0.269648	131.99	0.129912	92.2897		0.153037	109.749	0.339115	121.862	0.259404	94.6671		0.0443104	26.7049	0.351457	105.811	0.13137	63.7906
	0.0966913	48.2479	0.352085	182.99	0.265086	142.069		0.382298	188.225	0.324979	153.309	0.279212	127.31		0.108322	70.9136	0.118751	58.1275	0.0763862	54.2649		0.469449	336.661	0.29767	106.969	0.370216	135.107		0.0848019	51.1083	0.428242	128.928	0.277212	134.608
	0.0599627	29.9208	0.296746	154.228	0.0977353	52.38		0.278076	136.911	0.194228	91.6274	0.253064	115.388		0.202501	132.568	0.309114	151.308	0.103677	73.6523		0.430329	308.607	0.286752	103.045	0.294453	107.458		0.0577828	34.8244	0.300169	90.3696	0.204057	99.0859
	0.355365	177.323	0.244335	126.989	0.0447136	23.9637		0.131721	64.853	0.364707	172.051	0.441628	201.366		0.111396	72.9261	0.259658	127.1	0.0591684	42.0333		0.0201354	14.4399	0.260914	93.7602	0.326491	119.15		0.165926		0.364098	109.616	0.227228	110.337
	0.32905	164.193	0.305511	158.784	0.170582	91.4213		0.19075	93.916	0.226799	106.993	0.227235	103.611		0.135825	88.9186	0.2669	130.645	0.0632993	44.9679		0.0683448	49.0129	0.296887	106.687	0.219825	80.2231		0.0293457	16.869	0.276955	83.3808	0.329442	159.97
	0.656602	327.638	0.134429	69.867	0.0870357	46.6457		0.0618193	30.4368	0.247883	116.939	0.203683	92.8719		0.471259	308.512	0.157077	76.8877	0.200024	142.097		0.0107655	7.72039	0.303981	109.236	0.211788	77.2901		0.329313	189.302	0.394284	118.704	0.243982	118.473
	0.169995	84.8257	0.256113	133.11	0.157233	84.267		0.144606	71.197	0.285913	134.88	0.215678	98.3412		0.0546402	35.7705	0.108442	53.0813	0.0996559	70.7957		0.152339	109.249	0.289407	103.999	0.209915	76.6066		0.125343	72.0519	0.339397	102.18	0.206062	100.059
	0.316237	157.799	0.216076	112.302	0.133685	71.6468		0.361454	177.962	0.25485	120.226	0.206808	94.2968		0.0429259	28.1017	0.161115	78.8643	0.363874	258.497		0.0674419	48.3654	0.278278	100	0.243159	88.7387		0.122627	70.4907	0.326084	98.1716	0.097637	47.4105
	0.10787	53.826	0.220415	114.557	0.255325	136.838		0.424709	209.106	0.445695	210.257	0.295568	134.768		0.209672	137.263	0.0949389	46.4717	0.103036	73.1969		0.110026	78.9042	0.380891	136.874	0.219216	80.0009		0.3616	207.861	0.343086	103.29	0.120116	58.3259
	0.264005	131.736	0.401559	208.703	0.176124	94.3914		0.0514735	25.343	0.289156	136.41	0.223091	101.721		0.161662	105.833	0.189683	92.8481	0.149508	106.211		0.00265678	1.90529	0.289583	104.062	0.320118	116.824		0.0613548	35.2691	0.176274	53.0695	0.169387	82.2509
	0.198893	99.2455	0.276976	143.953	0.126125	67.5951		0.144645	71.2162	0.514868	242.89	0.21319	97.2068		0.0871359	57.044	0.277438	135.803	0.119214	84.6898		0.466166	334.307	0.285277	102.515	0.336152	122.676		0.168044	96.5981	0.308421	92.854	0.137927	66.9745
	0.0649444	32.4066	0.246066	127.888	0.0850945	45.6053		0.201179	99.0507	0.650588	306.916	0.207078	94.4199		0.0710887	46.5386	0.411432	201.392	0.101356	72.0034		0.257473	184.645	0.166162	59.7108	0.300995	109.845		0.19287	110.869	0.203741	61.3388	0.159154	77.2819
	0.148902	74.3005	0.209232	108.744	0.0906895	48.6039		0.467826	230.335	0.157658	74.3754	0.290621	132.512		0.711546	465.818	0.281838	137.957	0.14183	100.756		0.179389	128.647	0.326357	117.277	0.461258	168.332		0.250997	144.283	0.303208	91.2845	0.132529	64.3534
	0.436068	217.593	0.221798	115.275	0.128259	68.7388		0.106334	52.3537	0.216556	102.161	0.172537	78.6705		0.200068	130.976	0.203995	99.8536	0.141025	100.184		0.28122	201.675	0.280349	100.744	0.246564	89.9813		0.144201	82.8922	0.380949	114.689	0.469674	228.064
	0.308709	154.043	0.279708	145.373	0.0278595	14.9309		0.105064	51.7284	0.205766	97.0704	0.191721	87.4177		0.0225326	14.7511	0.213762	104.634	0.146382	103.99		0.240152	172.223	0.142228	51.11	0.341543	124.643		0.0453783	26.0852	0.390253	117.491	0.339461	164.835
	0.338129	168.723	0.230671	119.887	0.329268	176.467		0.124276	61.1875	0.210703	99.3995	0.253143	115.424		0.0204751	13.4041	0.340832	166.834	0.174117	123.693		0.103334	74.1051	0.391625	140.732	0.279247	101.909		0.156824	90.1484	0.328233	98.8186	0.162044	78.6852
	0.184181	91.9044	0.188918	98.1867	0.0315319	16.8991		0.171831	84.6012	0.243325	114.789	0.225943	103.022		0.152996	100.16	0.30628	149.921	0.147996	105.137		0.167398	120.048	0.191272	68.7341	0.291664	106.44		0.351639	202.136	0.247217	74.4278	0.0641494	31.1496
	0.253846	126.667	0.207421	107.803	0.303721	162.775		0.34294	168.847	0.100835	47.5691	0.173976	79.3266		0.175206	114.7	0.184335	90.2303	0.190991	135.68		0.110548	79.2786	0.30571	109.858	0.272422	99.4179		0.167174	96.098	0.303651	91.4179	0.162944	79.1223
	0.411396	205.282	0.203315	105.669	0.0271349	14.5426		0.402137	197.993	0.226169	106.696	0.190731	86.9663		0.211511	138.467	0.205837	100.755	0.165173	117.339		0.0058959	4.22819	0.360485	129.541	0.247115	90.1824		0.238551	137.128	0.275372	82.9042	0.251943	122.338
	0.179714	89.6754	0.21698	112.771	0.0770004	41.2674		0.817854	402.671	0.209404	98.7867	0.190511	86.866		0.381239	249.58	0.225888	110.57	0.187633	133.295		0.0905094	64.908	0.215923	77.5926	0.249267	90.9677		0.0910766	52.3543	0.365899	110.158	0.18907	91.8085
	0.0304576	15.198	0.229734	119.4	0.093016	49.8507		0.116848	57.5303	0.222223	104.834	0.151675	69.1582		0.364843	238.847	0.348864	170.766	0.185225	131.584		0.29277	209.958	0.255778	91.9146	0.410327	149.745		0.0586299	33.7027	0.628302	189.158	0.222762	108.169
	0.295891	147.647	0.234045	121.641	0.112049	60.0512		0.193439	95.2399	0.193669	91.3636	0.277863	126.695		0.152752	100	0.312165	152.802	0.138522	98.4062		0.28007	200.85	0.31249	112.294	0.20537	74.9479		0.280496	161.24	0.388585	116.988	0.131357	63.7843
	0.0648767	32.3728	0.225409	117.152	0.41289	221.283		0.217577	107.124	0.262078	123.636	0.294683	134.365		0.0297181	19.4551	0.366613	179.454	0.121914	86.6079		0.0654315	46.9236	0.237566	85.37	0.25405	92.7132		0.132867	76.377	0.425818	128.198	0.179435	87.13
	0.121453	60.6038	0.138195	71.8243	0.320499	171.767		0.0686845	33.8169	0.382478	180.435	0.377416	172.088		0.0994959	65.1356	0.296991	145.374	0.172445	122.505		0.177262	127.122	0.259591	93.2848	0.149074	54.4032		0.304645	175.122	0.439617	132.352	0.18032	87.5597
	0.605239	302.008	0.326636	169.763	0.076139	40.8057		0.103043	50.7334	0.259382	122.364	0.390033	177.841		0.032179	21.0662	0.15485	75.7976	0.314109	223.143		0.143138	102.65	0.549631	197.511	0.31084	113.438		0.0619242	35.5964	0.287983	86.7009	0.14806	71.8949
	0.816399	407.375	0.216325	112.431	0.345657	185.25		0.822037	404.731	0.213835	100.877	0.255062	116.299		0.353049	231.126	0.108414	53.0676	0.133044	94.5146		0.0323676	23.2121	0.346171	124.398	0.256621	93.6515		0.116663	67.0623	0.44514	134.015	0.205817	99.9405
	0.0808619	40.3492	0.245869	127.786	0.232834	124.784		0.0541721	26.6717	0.214256	101.076	0.205396	93.653		0.0550564	36.043	0.189602	92.8084	0.141935	100.831		0.0424608	30.4504	0.215176	77.3241	0.251974	91.9556		0.16536	95.0552	0.347186	104.525	0.266621	129.466
	0.144791	72.2492	0.120063	62.4005	0.203962	109.311		0.189056	93.082	0.152573	71.9765	0.130868	59.671		0.366373	239.848	0.348663	170.667	0.178955	127.13		0.0192535	13.8075	0.268845	96.6102	0.185285	67.6181		0.110976	63.7932	0.29737	89.5269	0.319533	155.159
	0.23164	115.586	0.147195	76.5019	0.186589	100		0.129502	63.7605	0.19871	93.7417	0.198641	90.573		0.0422192	27.639	0.149307	73.0844	0.188727	134.072		0.27596	197.902	0.322527	115.901	0.326114	119.012		0.574827	330.433	0.228453	68.7786	0.128288	62.294
	0.152104	75.8983	0.16942	88.0529	0.100051	53.6211		0.215189	105.949	0.212137	100.076	0.184836	84.2784		0.152802	100.033	0.115563	56.567	0.166544	118.313		0.148387	106.414	0.299635	107.675	0.293712	107.188		0.0368822	21.2013	0.341205	102.724	0.192348	93.4002
	0.30888	154.128	0.293337	152.457	0.267198	143.201		0.0546276	26.896	0.190555	89.8946	0.425243	193.895		0.0313313	20.5112	0.427591	209.302	0.144921	102.952		0.0336862	24.1578	0.229604	82.5089	0.246015	89.7809		0.41359	237.747	0.325396	97.9645	0.244016	118.489
	0.428013	213.574	0.121662	63.2316	0.140673	75.3919		0.277534	136.644	0.171342	80.8308	0.256119	116.781		0.424123	277.655	0.238756	116.869	0.119676	85.018		0.0661849	47.4639	0.237941	85.5048	0.253596	92.5475		0.146924	84.4575	0.339267	102.141	0.181828	88.2919
	0.0643435	32.1067	0.182852	95.034	0.126593	67.8459		0.144348	71.0699	0.232563	109.712	0.20651	94.1609		0.058667	38.4067	0.332942	162.972	0.186431	132.441		0.274113	196.578	0.386106	138.748	0.27237	99.3989		0.447547	257.267	0.456818	137.531	0.162492	78.9028
	0.1849	92.2632	0.159655	82.9778	0.240192	128.728		0.911463	448.76	0.203631	96.0632	0.308715	140.763		0.161894	105.985	0.136273	66.7044	0.152822	108.565		0.222728	159.727	0.289804	104.142	0.296259	108.117		0.545804	313.749	0.38462	115.795	0.234143	113.695
	0.14405	71.8794	0.14993	77.9234	0.285617	153.073		0.757814	373.111	0.167615	79.0726	0.195116	88.9657		0.269654	176.531	0.127494	62.4071	0.103451	73.4917		0.505798	362.729	0.252786	90.8394	0.138856	50.6742		0.0370108	21.2752	0.460305	138.581	0.208703	101.342
	0.07047	35.1638	0.152256	79.1323	0.358696	192.239		0.548173	269.894	0.0405027	19.1072	0.178098	81.2061		0.0387169	25.3462	0.275426	134.818	0.0457524	32.5026		0.00701902	5.03363	0.155887	56.0184	0.350286	127.834		0.212225	121.995	0.335707	101.069	0.152948	74.2684
	0.17347	86.5597	0.0555278	28.8596	0.228962	122.709		0.120299	59.2294	0.148492	70.0513	0.0954176	43.5069		0.152752		0.105679	51.7289	0.0708479	50.3304		0.0101083	7.24908	0.199655	71.7466	0.242624	88.5434		0.358008	205.797	0.349661	105.27	0.237946	115.542
	0.319609	159.482	0.157225	81.7148	0.226422	121.348		0.171553	84.4643	0.0861306	40.6322	0.193919	88.4199		0.108912	72.9465	0.146578	71.7486	0.0949101	67.4243		0.314833	225.78	0.527473	189.549	0.284212	103.721		0.683244	392.755	0.374101	112.628	0.263496	127.948
	0.416318	207.738	0.137947	71.6954	0.277897	148.935		0.113465	55.8646	0.111791	52.7376	0.22812	104.014		0.284206	190.354	0.254384	124.519	0.174775	124.16		0.352499	252.792	0.399771	143.659	0.256531	93.6186		0.0700957	40.2937	0.181087	54.5185	0.146634	71.2025
	0.225534	112.539	0.0868054	45.1155	0.383987	205.793		0.203107		0.181725	85.729	0.18035	82.2329		0.156409	104.759	0.192948	94.4462	0.162748	115.616		0.209522	150.257	0.231117	83.0526	0.240747	87.8584		0.337829	194.197	0.427391	128.671	0.22805	110.736
	0.0890641	44.4421	0.203107	105.561	0.310595	166.459		0.323133	287.787	0.0785573	37.0595	0.194124	88.5134		0.0560148	37.5173	0.189904	92.9562	0.167695	119.131		0.110571	79.295	0.285909	102.742	0.373449	136.287		0.334348	192.196	0.237007	71.3539	0.19624	95.2901
	0.140805	70.2602	0.149368	77.6313	0.279203	149.635		0.157085	139.902	0.439133	207.162	0.259887	118.499		0.142978	95.763	0.219494	107.44	0.156214	110.975		0.163815	117.479	0.085722	30.8044	0.315928	115.295		0.215315	123.771	0.777321	234.022	0.240645	116.852
	0.452342	225.714	0.207473	107.83	0.281197	150.704		0.0824937	73.4701	0.267163	126.035	0.126141	57.5156		0.405993	271.924	0.204593	100.146	0.182499	129.648		0.123829	88.8029	0.173451	62.3301	0.278909	101.785		0.155424	89.3436	0.606264	182.523	0.194096	94.249
	0.347355	173.327	0.212449	110.416	0.288543	154.641		0.211561	188.419	0.185521	87.5198	0.169238	77.1663		0.12934	86.6286	0.0866668	42.4226	0.192589	136.815		0.318325	228.284	0.35972	129.266	0.406504	148.35		0.0223626	12.8549	0.231593	69.724	0.304129	147.679
	0.200405		0.15332	79.6853	0.515103	276.063		0.0443318	39.4826	0.0806167	38.0311	0.157596	71.858		0.175376	117.462	0.231621	113.376	0.157421	111.832		0.0233102	16.7167	0.295931	106.344	0.154437	56.3604		0.0812228	46.69	0.311063	93.6494	0.264895	128.628
	0.151375	148.132	0.202521	105.257	0.186589			0.38056	338.932	0.186466	87.9656	0.256385	116.902		0.216298	144.871	0.271886	133.086	0.110218	78.299		0.0746839	53.5589	0.270366	97.1568	0.209023	76.281		0.0918234	52.7836	0.332157	100	0.227106	110.278
	0.1794	175.557	0.175643	91.2872	0.0193248	8.99539		0.112282	100	0.209021	98.606	0.219316			0.381096	255.248	0.222013	108.673	0.195523	138.9		0.0298339	21.3951	0.266662	95.8258	0.247054	90.1601		0.437636	251.57	0.37542	113.025	0.268369	130.314
	0.135036	132.143	0.169591	88.1418	0.138051	64.2606		0.219385	195.388	0.211976	100	0.123297	63.1565		0.21106	141.363	0.541443	265.031	0.161304	114.591		0.021368	15.3239	0.432789	155.524	0.187782	68.5293		0.131132	75.3797	0.421261	126.826	0.21158	102.739
	0.346478	339.056	0.150114	78.019	0.164506	76.575		0.18561	165.307	0.359853	169.761	0.225974	115.751		0.114763	76.8653	0.184161	90.1451	0.186996	132.842		0.111802	80.1779	0.536939	192.951	0.226992	82.8387		0.0519468	29.861	0.335116	100.891	0.220151	106.901
	0.144855	141.752	0.188619	98.0313	0.186343	86.7397		0.035108	31.2677	0.0716487	33.8004	0.179134	91.758		0.0665571	44.5782	0.365898	179.104	0.162024	115.102		0.216656	155.373	0.351867	126.444	0.321649	117.383		0.752848	432.766	0.371536	111.856	0.236045	114.619
	0.0725776	71.0229	0.121406	63.0985	0.0874971	40.7285		0.157426	140.206	0.0687227	32.42	0.208447	106.773		0.152526	102.158	0.156023	76.3718	0.255625	181.596		0.0403892	28.9648	0.400817	144.035	0.197132	71.9415		0.460346	264.624	0.59518	179.186	0.235034	114.128
	0.0392977	38.4559	0.122745	63.7945	0.124929	58.1525		0.178197	158.705	0.108422	51.1482	0.246244	126.134		0.170374	114.112	0.274899	134.56	0.185496	131.777		0.524706	376.288	0.344524	123.806	0.335958	122.605		0.43642	250.871	0.388745	117.037	0.279801	135.866
	0.102189	100	0.121429	63.1105	0.549025	255.563		0.0338366	30.1354	0.143712	67.7964	0.238915	122.38		0.159592	106.891	0.0510628	24.9948	0.140506	99.8157		0.0703549	50.4544	0.379731	136.457	0.277747	101.361		0.242379	139.329	0.366318	110.285	0.200873	97.5398
	0.131191	128.381	0.13066	67.9081	0.0733026	34.1212		0.127274	113.352	0.204895	96.6595	0.125112	64.0862		0.0289966	19.4212	0.0422893	20.7002	0.13178	93.6167		0.486985	349.237	0.104455	37.5362	0.239942	87.5646		0.0949977	54.6083	0.681295	205.112	0.352648	171.239
	0.0803134	78.593	0.309334	160.771	0.0732091	34.0777		0.107994	96.181	0.175617	82.8476	0.256592	131.434		0.170363	114.105	0.228488	111.843	0.20763	147.501		0.0483277	34.6578	0.332562	119.507	0.214818	78.3959		0.463762	266.588	0.318269	95.8188	0.212167	103.024
	0.0364905	35.7088	0.173258	90.0477	0.0879605	40.9442		0.171856	153.057	0.0694075	32.7431	0.22901	117.306		0.254527	170.476	0.0598266	29.2846	0.246214	174.911		0.474105	340	0.303784	109.166	0.297771	108.669		0.367476	211.239	0.359114	108.116	0.233753	113.506
	0.0376274	36.8214	0.234936	122.104	0.120402	56.0452		0.250139	222.777	0.0714759	33.7189	0.156551	80.1902		0.0975288	65.3223	0.228572	111.884	0.12751	90.5833		0.00252633	1.81174	0.284516	102.242	0.323626	118.104		0.436787	251.082	0.250417	75.3912	0.299484	145.423
	0.207587	203.14	0.114822	59.6766	0.297656	138.554		0.223584	199.127	0.0942145	44.4458	0.216541	110.919		0.029496	19.7557	0.31834	155.824	0.203049	144.246		0.54439	390.405	0.592601	212.953	0.237954	86.8391		0.329622	189.479	0.30133	90.7191	0.188083	91.3292
	0.119949	117.38	0.13914	72.3155	0.153854	71.6166		0.0244891	21.8104	0.167969	79.2396	0.284082	145.516		0.370994	248.482	0.358784	175.621	0.120702	85.7469		0.0527226	37.8096	0.397623	142.887	0.245327	89.5298		0.037062	21.3047	0.335246	100.93	0.217347	105.539
	0.0806465	78.919	0.192407		0.14902	69.3665		0.10962	97.6292	0.098255	46.3519	0.254426	130.325		0.245239	164.255	0.244051	119.461	0.241958	171.887		0.0420765	30.1748	0.242387	87.1025	0.232361	84.798		0.12054	69.291	0.413052	124.354	0.18739	90.9927
	0.0398329	38.9796	0.403556	189.244	0.175722	81.7958		0.047948	42.7032	0.0979581	46.2119	0.241313	123.608		0.00264952	1.77458	0.196941	96.4008	0.173116	122.982		0.135747	97.3498	0.273969	98.4515	0.207679	75.7906		0.17988	103.402	0.355095	106.906	0.187859	91.2205
	0.0685286	67.0606	0.422983	198.354	0.129949	60.4892		0.180928	161.137	0.147949	69.7952	0.262433	134.426		0.186147	124.676	0.136389	66.7611	0.109824	78.0191		0.00424627	3.04518	0.163065	58.5979	0.206049	75.1957		0.128625	73.9386	0.253384	76.2844	0.280144	136.032
	0.0742328	72.6427	0.182482	85.5735	0.16698	77.7266		0.188769	168.12	0.21009	99.1103	0.0752954	38.5686		0.282422	189.159	0.175985	86.143	0.14747	104.763		0.0129855	9.31244	0.386288	138.814	0.3035	110.76		0.209921	120.671	0.564764	170.029	0.238769	115.941
	0.103397	101.182	0.295014	138.344	0.406628	189.279		0.185668	165.359	0.0622616	29.372	0.420551	215.419		0.206345	138.205	0.0717952	35.1431	0.207315	147.277		0.582411	417.671	0.125354	45.0463	0.167934	61.286		0.12379	71.1592	0.419523	126.303	0.234768	113.999
	0.120741	118.155	0.16241	76.1609	0.144741	67.3747		0.429329	382.367	0.125615	59.2591	0.193721	99.2299		0.0304455	20.3916	0.22848	111.839	0.206931	147.004		0.217395	155.903	0.209491	75.2812	0.194507	70.9836		0.207288	119.157	0.353932	106.556	0.248235	120.538
	0.0553391	54.1537	0.236728	111.012	0.143563	66.8263		0.137786	122.714	0.174656	82.3942	0.176845	90.5855		0.13206	88.4504	0.376615	184.35	0.153998	109.4		0.195408	140.135	0.221465	79.5841	0.173117	63.1775		0.324595	186.59	0.317442	95.5699	0.208186	101.091
	0.0132111	12.9281	0.193812	90.8866	0.102748	47.8276		0.205564	183.078	0.0697581	32.9085	0.119573	61.249		0.125956	84.3621	0.0590162	28.8879	0.172954	122.867		0.139442		0.276077	99.2091	0.117581	42.9101		0.206738	118.841	0.330567	99.5213	0.225633	109.563
	0.0057779	5.65413	0.704152	330.206	0.116714	54.3285		0.208526	185.716	0.0557758	26.3123	0.193015	98.8682		0.0434262	29.0858	0.367685	179.978	0.1009	71.6795		0.273387	220.516	0.377505	135.658	0.209848	76.5821		0.0870945	50.0652	0.455101	137.014	0.288698	140.186
	0.221939	217.185	0.265711	124.603	0.210502	97.9854		0.257201	229.067	0.137021	64.6399	0.187761	96.177		0.250899	168.046	0.241687	118.304	0.146213	103.87		0.0686803	55.3981	0.40837	146.749	0.218724	79.8213		0.155882	89.6069	0.203602	61.2969	0.255884	124.252
	0.042312	41.4056	0.302152	141.692	0.193963	90.2867		0.188949	168.281	0.938015	442.51	0.115941	59.3886		0.299052	200.297	0.270178	132.25	0.235928	167.604		0.0753779	60.8004	0.232854	83.6768	0.134113	48.9433		0.128983	74.1444	0.338015	101.764	0.210019	101.981
	0.161357	157.901	0.284558	133.441	0.487108	226.741		0.0773394	68.8796	0.211976		0.134081	68.6804		0.45986	308.002	0.1989	97.3597	0.156834	111.415		0.198001	159.709	0.225611	81.074	0.568884	207.609		0.188494	108.354	0.292148	87.9548	0.214072	103.949
	0.0191016	18.6924	0.228423	107.117	0.21483	100		0.150963	134.45	0.0812367	70.2408	0.0739817	37.8957		0.198029	132.635	0.121666	59.5544	0.126794	90.0746		0.154403	124.543	0.223182	80.2011	0.1554	56.7118		0.668921	384.521	0.353254	106.352	0.190699	92.5995
	0.118879	116.332	0.284695	133.505	0.194282	90.4352		0.166893	148.637	0.113592	98.2167	0.46558	238.484		0.0131798	8.82749	0.160617	78.6205	0.154589	109.82		0.075262	60.7069	0.231348	83.1356	0.274017			0.0784661	45.1053	0.311569	93.8017	0.194176	94.2879
	0.43455	425.241	0.261383	122.573	0.223257	103.923		0.0380893	33.9229	0.166377	143.857	0.470573	241.042		0.165254	110.683	0.127431	62.3763	0.127816	90.8007		0.124355	100.306	0.127897	45.9602	0.200314	71.0443		0.86047	494.631	0.281529	84.7578	0.268358	130.309
	0.0379037	37.0918	0.244802	114.798	0.297516	138.489		0.34818	310.094	0.10097	87.3031	0.0857191	43.908		0.0726138	48.6349	0.0718175	35.154	0.195569	138.932		0.219219	176.824	0.385039	138.365	0.560805	198.898		0.173962		0.313962	94.5222	0.273663	132.885
	0.0391808	38.3415	0.282458	132.456	0.169085	78.7064		0.17734	157.942	0.153301	132.551	0.143529	73.52		0.0387834	25.9761	0.163388	79.9769	0.153324	108.922		0.040635	32.7765	0.59264	212.967	0.182948	64.8852		0.124217	146.413	0.276243	83.1664	0.189067	91.8071
	0.170366	166.717	0.226614	106.269	0.303909	141.465		0.182494	162.532	0.113328	97.9884	0.214277	109.759		0.431988	289.335	0.139038	68.0578	0.210798	149.751		0.0200658	16.1852	0.350796	126.06	0.315138	111.768		0.209893	247.397	0.354282	106.661	0.54674	265.486
	0.0544665	53.2998	0.28509	133.691	0.366106	170.417		0.0215053	19.1529	0.126795	109.633	0.386099	197.772		0.00891489	5.97097	0.235516	115.283	0.342946	243.629		0.411047	331.554	0.404763	145.453	0.0869879	30.8515		0.305742	360.373	0.271688	81.7951	0.205939
	0.010681	10.4522	0.417674	195.865	0.230032	107.076		0.13211	117.659	0.247663	214.14	0.204961	104.987		0.0620487	41.5586	0.278393	136.271	0.276494	196.422		0.224368	180.977	0.441964	158.821	0.23532	83.4597		0.00674092	7.94541	0.272851	82.1452	0.55066	208.781
	0.0972547	95.1714	0.583168	273.472	0.225953	105.178		0.0502566	44.7593	0.1867	161.429	0.191677	98.1829		0.0323606	21.6743	0.114646	56.1181	0.246134	174.854		0.157063	126.688	0.250518	90.0244	0.28933	102.615		0.0155376	18.3139	0.459285	138.273	0.331068	125.523
	0.0227979	22.3095	0.274743	128.839	0.160472	74.6972		0.15798	140.699	0.107965	93.3513	0.0730997	37.4439		0.0159298	10.6694	0.264877	129.655	0.129447	91.9593		0.246159	198.554	0.226861	81.5232	0.492601	174.708		0.110142	129.823	0.301694	90.8287	0.303824	115.194
	0.0528079	51.6767	0.318605	149.407	0.170735	79.4745		0.581674	518.047	0.109319	94.522	0.520781	266.76		0.348867	233.662	0.197137	96.4967	0.158274	112.438		0.0594803	47.9773	0.224832	80.794	0.275696	97.7796		0.0364705	42.9872	0.410865	123.696	0.469152	177.878
	0.208273	203.812	0.306797	143.87	0.171661	79.9055		0.031255	27.8362	0.15172	131.184	0.0125226	6.41446		0.209063	140.025	0.147786	72.3399	0.183427	130.307		0.0288257	23.251	0.217879	78.2954	0.234248	83.0795		0.589801	695.189	0.3116	93.8111	0.394063	149.408
	0.0307852	30.1257	0.35307	165.569	0.181981	84.7093		0.0432421	38.5121	0.118229	102.226	0.220665	113.031		0.0817059	54.7245	0.185632	90.8651	0.250224	177.759		0.30828	248.661	0.181757	65.3149	0.535721	190.001		0.0130677	15.4027	0.342551	103.129	0.232169	88.0262
	0.117042	114.535	0.215948	101.267	0.120167	55.9359		0.0348508	31.0386	0.180206	155.814	0.143504	73.5072		0.00300952	2.0157	0.101246	49.559	0.148919	105.792		0.181227	146.179	0.211365	75.9546	0.533294	189.141		0.0858702	101.214	0.25355	76.3344	0.341272	129.392
	0.00876695	8.57915	0.249035	116.783	0.17119	79.6863		0.110696	98.5875	0.0769074	66.4975	0.304543	155.996		0.50354	337.258	0.177158	86.7172	0.160102	113.737		0.249193	201.001	0.345873	124.29	0.296382	105.116		0.0393826	46.4196	0.384975	115.902	0.18491	70.1081
	0.0427431	41.8275	0.232068	108.826	0.100174	46.6294		0.057222	50.9628	0.087889	75.9927	0.306969	157.239		0.00456913	3.06029	0.19743	96.6401	0.144487	102.644		0.0822664	66.3567	0.151725	54.5228	0.339174	120.293		0.0270703	31.9073	0.272033	81.8989	0.245775	93.1848
	0.168467	164.858	0.143186	67.1459	0.541625	252.118		0.0772398	68.7909	0.138916	120.113	0.225123	115.315		0.0172324	11.5418	0.0756555	37.0327	0.179938	127.828		0.071638	57.7838	0.279097	100.294	0.216375	76.7406		0.0857981	101.129	0.306201	92.1856	0.159087	60.3173
	0.0333891	32.6739	0.198562	93.1141	0.688843	320.646		0.0606069	53.9774	0.128625	111.215	0.0682988	34.9847		0.469129	314.211	0.231655	113.393	0.181863	129.196		0.0858407	69.2398	0.345199	124.048	0.663405	235.286		0.00680748	8.02387	0.364006	109.589	0.239363	90.7537
	0.154787	151.471	0.215609	101.108	0.22692	105.628		0.212885	189.599	0.169145	146.25	0.15765	80.7532		0.242899	162.688	0.285376	139.689	0.0356057	25.2943		0.061599	49.6862	0.336301	120.851	0.177285	62.8767		0.405702	478.194	0.304032	91.5326	0.26375	100
	0.0450641	44.0988	0.251616	117.993	0.0162438	7.56123		0.0602921	53.697	0.108852	94.1183	0.354627	181.651		0.10922	73.1528	0.0597762	29.2599	0.11294	80.2327		0.0492387	39.7163	0.332904	119.63	0.0976428	34.6304		0.012921	15.2298	0.469602	141.38	0.350341	132.831
	0.0846976	82.8833	0.255361	119.749	0.202903	94.4482		0.166273	148.085	0.106419	92.0146	0.104906	53.7361		0.124897	83.6528	0.127109	62.2187	0.191221	135.844		0.379036	305.733	0.806681	289.883	0.246884	87.561		0.022729	26.7903	0.348029	104.778	0.179011	67.8715
	0.208923	204.448	0.281205	131.869	0.307807	143.279		0.285281	254.075	0.273308	236.314	0.118067	60.4776		0.0983188	65.8514	0.0683763	33.4696	0.0960702	68.2484		0.169129	136.421	0.0948367	34.0798	0.264041	93.646		0.06408	75.5301	0.300583	90.4943	0.239906	90.9596
	0.0801725	78.4551	0.273341	128.181	0.27394	127.515		0.0292309	26.0335	0.139099	120.271	0.110238	56.4673		0.149304	100	0.164191	80.37	0.0954907	67.8367		0.163601	131.962	0.162206	58.2892	0.185114	65.6534		0.155399	183.166	0.285244	85.8763	0.560923	212.672
	0.401752	393.146	0.287837	134.979	0.264603	123.169		0.0978158	87.1162	0.157473	136.158	0.196728	100.77		0.274434	183.809	0.182702	89.4309	0.176806	125.603		0.321524	259.344	0.332121	119.349	0.042723	15.1523		0.280853	331.037	0.326018	98.1518	0.271907	103.093
	0.403438	394.796	0.560281	262.739	0.327088	152.254		0.096893	86.2943	0.138938	120.132	0.305907	156.695		0.168197	112.654	0.176423	86.3574	0.140317	99.6814		0.0270168	21.792	0.302361	108.654	0.218557	77.5144		0.0613693	72.335	0.317475	95.5798	0.306787	116.317
	0.139346	136.361	0.249996	117.234	0.332473	154.761		0.0814163	72.5106	0.133078	115.065	0.39881	204.283		0.357751	239.612	0.19813	96.9828	0.0840449	59.7056		0.0576372	46.4906	0.298113	107.128	0.103126	36.5751		0.0199817	23.5521	0.351477	105.817	0.305119	115.685
	0.0146745	14.3602	0.265496	124.502	0.176378	82.1012		0.123507	109.997	0.19008	164.352	0.138252	70.8169		0.0823991	55.1888	0.104448	51.1263	0.140765			0.216158	174.355	0.229294	82.3975	0.324036	114.924		0.19302	227.51	0.365378	110.002	0.458853	173.973
	0.0701243	68.6222	0.835513	391.807	0.220013	102.413		0.0432514	38.5203	0.251931	217.831	0.205008	105.011		0.110819	74.2237	0.157634	77.1604	0.109667	63.4844		0.123976	100	0.27061	97.2445	0.240618	85.3387		0.155131	182.85	0.39113	117.755	0.411805	156.135
	0.225539	220.708	0.221622	103.928	0.155119	72.2055		0.0333233	29.6782	0.203029	175.548	0.437679	224.193		0.213344	142.892	0.161708	79.1546	0.0995262	57.614		0.275565	222.273	0.164449	59.0952	0.399135	141.559		0.649653	765.735	0.250264	75.3451	0.43666	165.558
	0.246163	240.89	0.252523	118.419	0.252739	117.646		0.04932	43.9251	0.105834	91.5088	0.0278512	14.2662		0.127043	85.0902	0.0254969	12.4805	0.516467	298.974		0.289596	233.59	0.251974	90.5476	0.355187	125.972		0.0220939	26.0417	0.29914	90.0598	0.2879	109.156
	0.183044	179.123	0.195977	91.9018	0.238832	111.173		0.0689618	61.4184	0.110682	95.7006	0.228999	117.3		0.0215751	14.4505	0.0632678	30.969	0.124378	72.0003		0.139979	112.908	0.355847	127.875	0.115762	41.0567		0.0591782	69.7524	0.392922	118.294	0.212987	80.7534
	0.0486429	47.6009	0.21324	99.9972	0.187464	87.2616		0.131819	117.4	0.0950859	82.2155	0.122179	62.5838		0.0592438	39.68	0.0806141	39.4598	0.312166	180.708		0.0537332	43.3416	0.506638	182.062	0.322756	114.47		0.090858	107.093	0.315098	94.8642	0.235107	89.1401
	0.220853	216.122	0.274166	128.568	0.18725	87.1619		0.0128097	11.4085	0.040909	35.3717	0.106235	54.4168		0.255772	171.31	0.166235	81.3705	0.518308	300.04		0.0813951	65.6539	0.260589	93.6434	0.656431	232.813		0.0104961	12.3716	0.167928	50.5568	0.216257	81.9932
	0.0161256	15.7802	0.239487	112.306	0.480493	223.662		0.0120937	10.7708	0.114899	99.3468	0.136309	69.8217		0.149304		0.333842	163.413	0.219211	126.898		0.0484006	39.0403	0.231362	83.1406	0.592498	210.138		0.0111416	13.1324	0.346044	104.181	0.319459	121.122
	0.0738636	72.2814	0.297856	139.677	0.464748	216.333		0.129931	115.718	0.163003	140.94	0.355552	182.125				0.102579	50.2115	0.137225	79.4372		0.0544776	43.9421	0.177762	63.8793	0.234816	83.2809		0.270193	318.472	0.158592	47.7461	0.289202	109.65
	0.00763522	7.47167	0.4304	201.833	0.263712	122.754		0.0557714	49.6708	0.116075	100.364	0.010565	5.41172				0.306416	149.988	0.451624	261.437		0.0128501	10.365	0.0911691	32.7619	0.305295	108.277		0.337263	397.526	0.366334	110.289	0.312385	118.44
	0.170303	166.655	0.25277	118.534	0.247196	115.066		0.0799511	71.2056	0.0991793	85.7548	0.191813	98.2525				0.0841293	41.1805	0.187665	108.636		0.110036	88.7559	0.213842	76.8447	0.340036	120.599		0.0917853	108.186	0.414861	124.899	0.210324	79.7437
	0.0930055	91.0132	0.172759	81.0139	0.259101	120.607		0.385131	343.003	0.203963	176.355	0.341486	174.92				0.140987	69.0118	0.622592	360.408		0.0165343	13.3367	0.188045	67.5745	0.553052	196.148		0.11459	135.065	0.37102	111.7	0.256844	97.3816
	0.246301	241.025	0.30066	140.992	0.308798	143.741		0.132931	118.39	0.129722	112.163	0.195224					0.522372	255.696	0.263802	152.71		0.239473	193.161	0.179797	64.6106	0.534242	189.477		0.245998	289.954	0.348918	105.046	0.123389	46.7826
	0.0550033	53.8251	0.173626	81.4205	0.357047	166.2		0.460271	409.924	0.028903	24.9908	0.161219	74.8933				0.204294		0.137441	79.5622		0.0365107	29.4498	0.187748	67.4678	0.0300264	10.6493		0.0815685	96.1435	0.364532	109.747	0.429177	162.721
	0.00596108	5.83339	0.237082	111.178	0.310146	144.368		0.0263918	23.5049	0.0272986	23.6036	0.115547	53.6766				0.176098	151.965	0.229215	132.689		0.00864596	6.9739	0.207868	74.698	0.107701	38.1977		0.0736946	86.8626	0.406072	122.253	0.273903	103.849
	0.0882164	86.3267	0.291527	136.709	0.197837	92.09		0.0569435	50.7147	0.111425	96.343	0.301871	140.232				0.215705	186.144	0.31347	181.462		0.0231385	18.6637	0.310449	111.561	0.326897	115.939		0.0227257	26.7864	0.332157		0.744184	282.155
	0.213598	209.022	0.211944	99.3894	0.336443	156.609		0.0841283	74.9259	0.187606	162.212	0.0964678	44.8135				0.139434	120.325	0.190958	110.542		0.210934	170.141	0.413966	148.76	0.126961	45.0286		0.089613	105.625	0.157413	74.0882	0.413373	156.729
	0.240121	234.977	0.250251	117.353	0.325125	151.341		0.0791343	70.4782	0.0448678	38.7947	0.253229	117.636				0.0799771	69.0166	0.130085	75.304		0.0271816	21.9249	0.211532	76.0146	0.282783	100.293		0.0242362	28.5668	0.203447	95.7546	0.333606	126.486
	0.370317	362.384	0.285058	133.676	0.245219	114.146		0.13685	121.881	0.127637	110.361	0.118229	54.9225				0.14527	125.361	0.172976	100.133		0.142835	115.212	0.427961	153.789	0.137405	48.7327		0.0514009	60.5854	0.179132	84.3105	0.666246	252.605
	0.210456	205.948	0.281601	132.055	0.276109	128.524		0.345404	307.622	0.0649065	56.121	0.232575	108.041				0.135603	117.019	0.135224	78.2789		0.207411	167.299	0.157322	56.5341	0.311907	110.622		0.0868869	102.412	0.140546	66.1496	0.219192	83.106
	0.204394	200.016	0.201874	94.6672	0.250513	116.61		0.0583613	51.9774	0.165724	143.292	0.141327	65.6526				0.135976	117.341	0.244145	141.331		0.171432	138.278	0.207123	74.4302	0.117904	41.8164		0.163753	193.013	0.294701	138.704	0.726974	275.63
	0.107762	105.454	0.249763	117.124	0.282798	131.638		0.230004	204.845	0.0506201	43.7684	0.133859	62.1834				0.120449	103.942	0.189096	109.464		0.0871291	70.279	0.162195	58.2852	0.249012	88.3158		0.126597	149.218	0.177994	83.7749	0.28138	106.684
	0.254132	248.688	0.334808	157.006	0.262598	122.235		0.0332082	29.5757	0.1059	91.5658	0.180359	83.7846				0.110266	95.1545	0.23133	133.913		0.170977	137.911	0.650225	233.66	0.220081	78.0549		0.221899	261.549	0.13053	61.4354	0.0185114	7.01854
	0.032852	32.1483	0.25302	118.652	0.293442	136.593		0.14769	131.535	0.140154	121.183	0.150811	70.0583				0.0702971	60.6632	0.16492	95.4694		0.227711	183.673	0.195307	70.1841	0.423305	150.131		0.253474	298.766	0.378545	178.166	0.477357	180.988
	0.13875	135.778	0.255904	120.004	0.0331107	15.4125		0.294406	262.202	0.0628796	54.3685	0.0843246	39.1725				0.190509	164.401	0.507402	293.726		0.286303	230.934	0.300523	107.994	0.28113	99.7069		0.412025	485.647	0.243496	114.604	0.0948938	35.9787
	0.228749	223.849	0.125283	58.7505	0.217525	101.254		0.0527182	46.9516	0.051936	44.9062	0.244521	113.591				0.113592	98.0247	0.129726	75.0962		0.0122065	9.84586	0.308852	110.987	0.646232	229.196		0.0398733	46.998	0.112413	52.9085	0.47372	179.609
	0.0323309	31.6383	0.247167	115.907	0.148933	69.326		0.0430198	38.3141	0.0475863	41.1452	0.179854	83.55				0.143612	123.931	0.0804132	46.5498		0.276234	222.812	0.127308	45.7485	0.161414	57.2478		0.138504	163.252	0.177226	83.4134	0.195602	74.1619
	0.369779	361.858	0.269542	126.4	0.250283	116.503		0.0510504	45.4662	0.0199137	17.2183	0.297413	138.161				0.149213	128.764	0.406966	235.586		0.207344	167.245	0.301234	108.249	0.290609	103.069		0.249029	293.526	0.107157	50.4347	0.319825	121.261
	0.16814	164.538	0.213246	100	0.21483			0.259728	231.318	0.130921	113.2	0.00230074	1.06879				0.140627	121.355	0.124209	71.9025		0.123011	99.2216	0.30473	109.506	0.365526	129.639		0.0499633	58.8909	0.0890722	41.9228	0.385494	146.159
	0.127552	124.82	0.0806912	37.8395				0.130794	116.487	0.0638235	55.1846	0.221803	103.037				0.195486	168.695	0.168676	97.6437		0.344598	277.955	0.169766	61.0059	0.234915	83.316		0.0684258	80.6524	0.106479	50.1155	0.638942	242.253
	0.0136816	13.3885	0.266244	124.853				0.093852	83.586	0.232157	200.733	0.307366	142.785				0.119136	102.809	0.120158	69.5574		0.0776168	62.6063	0.220479	79.2298	0.475263	168.559		0.0795344	93.7459	0.153677	72.3298	0.393747	149.288
	0.0233453	22.8452	0.0938602	44.015				0.233526	207.982	0.0816736	70.6186	0.249722	116.007				0.074183	64.0165	0.072906	42.204		0.0914407	73.7568	0.263336	94.6305	0.319636	113.364		0.135166	159.318	0.0893029	42.0314	0.25499	96.6787
	0.100072	97.9283	0.232161	108.87				0.0333152	29.671	0.153071	132.352	0.0944302	43.867				0.024183	20.8688	0.116462	67.4179		0.0351435	28.347	0.194694	69.9638	0.719601	255.217		0.405279	477.696	0.125359	59.0016	0.256544	97.2679
	0.256428	250.935	0.339706	159.302				0.0873829	77.8245	0.117393	101.503	0.606432	281.714				0.108262	93.4252	0.194415	112.544		0.0391441	31.5739	0.278278		0.227557	80.7064		0.0944556	111.333	0.268524	126.384	0.115524	43.8006
	0.0499437	48.8739	0.121867	57.1486				0.0222484	19.8148	0.0753016	65.1091	0.177417	82.4179				0.226364	195.342	0.258775	149.8		0.272356	219.684	0.168704	144.409	0.136506	48.4139		0.0535	63.0596	0.296849	139.715	0.764163	289.73
	0.0926044	90.6207	0.0412622	19.3496				0.116008	103.318	0.183581	158.732	0.312811	145.314				0.0362834	31.3109	0.0746191	43.1957		0.543927	438.736	0.101082	86.525	0.265653	94.2177		0.0852903	100.53	0.267206	125.764	0.330112	125.161
	0.225824	220.987	0.0922529	43.2613				0.028871	25.7129	0.111885	96.7407	0.121725	56.5466				0.121889	105.185	0.110337	63.8722		0.18091	145.923	0.170803	146.205	0.306148	108.58		0.0161648	19.0532	0.255994	120.486	0.379381	143.841
	0.14757	144.409	0.137049	64.268				0.0507392	45.1891	0.0804783	69.5851	0.234265	108.826				0.145596	125.643	0.373569	216.253		0.161629	130.371	0.114117	97.6828	0.272463	96.633		0.0889243	104.814	0.252593	118.886	0.267643	101.476
	0.168968	165.349	0.084007	39.3944				0.112282		0.107071	92.5783	0.00700276	3.25309				0.0704791	60.8202	0.0945323	54.7231		0.196216	158.269	0.13012	111.381	0.378258	134.155		0.0766998	90.4048	0.212603	100.064	0.388422	147.269
	0.102189		0.0878181	41.1816						0.112561	97.3252	0.33805	157.039				0.127872	110.348	0.336865	195.005		0.106539	85.9352	0.118791	101.684	0.260324	92.3277		0.231143	272.444	0.317498	149.434	0.49427	187.401
			0.081214	38.0847						0.176131	152.291	0.222827	103.513				0.121985	105.267	0.243002	140.67		0.0879649	70.9532	0.150644	128.95	0.204077	72.3789		0.472505	556.934	0.357313	168.173	0.152906	57.9738
			0.0348764	16.355						0.0664464	57.4525	0.247111	114.794				0.108079	93.2672	0.361957	209.531		0.0378776	30.5524	0.117658	100.714	0.233715	82.8904		0.0383407	45.1916	0.229818	108.166	0.951717	360.841
			0.0412411	19.3397						0.223731	193.448	0.114464	53.1735				0.105372	90.9312	0.108382	62.7405		0.110932	89.4786	0.143233	122.606	0.29823	105.772		0.128523	151.488	0.317934	149.639	0.28849	109.38
			0.036397	17.0681						0.129101	111.626	0.288749	134.137				0.162465	140.2	0.142303	82.3768		0.154127	124.32	0.204097	174.705	0.36796	130.502		0.216558	255.253	0.157916	74.325	0.566298	214.71
			0.0487697	22.8702						0.126081	109.015	0.21959	102.009				0.147411	127.209	0.112277	64.9952		0.357639	288.474	0.102263	87.536	0.344086	122.035		0.563472	664.155	0.124723	58.7023	0.142076	53.8677
			0.0882528	41.3854						0.0850991	73.5804	0.303252	140.874				0.132589	114.418	0.115159	66.6636		0.0396353	31.9701	0.0711295	60.886	0.192706	68.346		0.116127	136.877	0.224899	105.851	0.530392	201.096
			0.124995	58.6154						0.10841	93.7361	0.129049	59.9489				0.078652	67.8731	0.127921	74.0513		0.0793124	63.974	0.246685	211.16	0.805655	285.737		0.0888506	104.727	0.0591609	27.8447	0.406724	154.208
			0.0615617	28.8689						0.1308	113.095	0.256321	119.072				0.123993	107	0.250051	144.75		0.447843	361.234	0.403264	345.189	0.53595	190.083		0.0533399	62.8709	0.217296	102.273	0.164619	62.4148
			0.154393	72.4014						0.143486	124.064	0.284834	132.318				0.115881	100	0.299216	173.211		0.137051	110.546	0.123717	105.9	0.762751	270.521		0.217504	256.368	0.254316	119.697	0.114834	43.539
			0.098423	46.1547						0.128187	110.836	0.294089	136.617				0.109185	94.2217	0.098268	56.8857		0.153884	124.124	0.287901	246.44	0.290493	103.028		0.0204582	24.1137	0.176037	82.8538	0.170603	64.6836
			0.196273	92.0406						0.149902	129.612	0.309334	143.699				0.146128	126.102	0.162233	93.9139		0.0053901	4.3477	0.334917	286.685	0.257487	91.3215		0.0993669	117.122	0.267118	125.722	0.148343	56.2438
			0.132361	62.0696						0.0803434	69.4685	0.230126	106.904				0.146202	126.166	0.230264	133.296		0.148227	119.561	0.159329	136.384	0.332426	117.9		0.0667058	78.625	0.290988	136.957	0.367105	139.187
			0.0746254	34.995						0.0476804	41.2266	0.289753	134.603				0.0987743	85.2377	0.164932	95.4763		0.0696984	56.2193	0.399681	342.122	0.22639	80.2925		0.103792	122.338	0.210985	99.3025	0.232572	88.179
			0.0646286	30.3071						0.0895977	77.4701	0.0136966	6.36267				0.122311	105.549	0.543682	314.728		0.0160606	12.9546	0.110461	94.5533	0.397279	140.901		0.483021	569.329	0.284487	133.897	0.130224	49.374
			0.0851686	39.9391						0.120706	104.368	0.241647	112.256				0.0796399	68.7256	0.508102	294.132		0.0585804	47.2514	0.120008	102.725	0.33704	119.536		0.578865	682.299	0.181047	85.2118	0.611672	231.914
			0.0965384	45.2709						0.211226	182.635	0.226851	105.382				0.0846884	73.0822	0.201731	116.779		0.061194	49.3596	0.164836	141.098	0.396871	140.756		0.147719	174.114	0.246472	116.005	0.107333	40.695
			0.0874543	41.011						0.120651	104.32	0.138487	64.3333				0.10564	91.1625	0.180825	104.677		0.137147	110.624	0.144491	123.683	0.187462	66.4861		0.0843905	99.4697	0.368548	173.461	0.0988764	37.4887
			0.0424581	19.9104						0.122884	106.251	0.0592558	27.5269				0.105213	90.794	0.250496	145.008		0.123976		0.1901	162.723	0.247074	87.6284		0.0502381	59.2148	0.30465	143.387	0.199249	75.5446
			0.0672597	31.5409						0.110415	95.4697	0.245786	114.178				0.0974	84.0517	0.274293	158.784				0.3808	325.96	0.194941	69.1387		0.042039	49.5507	0.211921	99.743	0.334443	126.803
			0.0728482	34.1616						0.0571596	49.4227	0.687497	319.372				0.128309	110.725	0.119715	69.301				0.282036	241.42	0.177648	63.0055		0.129398	152.519	0.209796	98.7429	0.299967	113.732
			0.0333244	15.6272						0.0682916	59.0479	0.297474	138.19				0.101783	87.8341	0.152154	88.0794				0.131965	112.961	0.370032	131.237		0.0209742	24.7219	0.230912	108.681	0.191049	72.4356
			0.0370971	17.3964						0.0459672	39.7453	0.382008	177.459				0.0847099	73.1008	0.194434	112.555				0.218889	187.366	0.234587	83.1997		0.0304273	35.8642	0.292923	137.868	0.0574547	21.7838
			0.0642118	30.1116						0.10985	94.9812	0.0576502	26.781				0.0793257	68.4544	0.1101	63.735				0.139965	119.808	0.281956			0.065554	77.2674	0.260818	122.757	0.0508711	19.2876
			0.0831119	38.9747						0.193861	167.621	0.416739	193.593				0.121556	104.897	0.172517	99.8671				0.126064	107.909	0.193666	82.4874		0.0089032	10.4941	0.0949672	44.6974	0.155342	58.8974
			0.0941527	44.1522						0.1321	114.22	0.236265	109.755				0.0822839	71.0072	0.143706	83.189				0.1047	89.622	0.111667	47.5619		0.114788	135.299	0.268782	126.505	0.174783	66.2684
			0.192931	90.4734						0.129709	112.152	0.220901	102.618				0.1109	95.7016	0.142611	82.5551				0.13985	119.71	0.183741	78.2601		0.156078	183.967	0.173602	81.7077	0.128929	48.883
			0.0940546	44.1061						0.089859	77.6961	0.152272	70.737				0.104945	90.5627	0.158319	91.6482				0.149844	128.265	0.179265	76.3536		0.0998149	117.65	0.275095	129.477	0.275283	104.373
			0.0712234	33.3996						0.0873037	75.4866	0.137184	63.728				0.0888351	76.6606	0.212265	122.877				0.0898865	76.9418	0.474445	202.079		0.131244	154.695	0.245807	115.692	0.139782	52.9979
			0.102793	48.204						0.0663278	57.35	0.215265	100				0.100105	86.386	0.150438	87.086				0.149531	127.997	0.676967	288.338		0.154136	181.678	0.219877	103.488	0.817093	309.798
			0.0747037	35.0317						0.110033	95.1394	0.0827172	38.4258				0.0902485	77.8803	0.172746					0.103582	88.665	0.225367	95.9897		0.243637	287.171	0.271852	127.95	0.41221	156.288
			0.159464	74.7794						0.144418	124.87	0.140709	65.3655				0.143761	124.059	0.32611	169.826				0.112612	96.3946	0.248538	105.859		0.024233	28.563	0.230081	108.29	0.330332	125.244
			0.0304114	14.2612						0.166323	143.81	0.295647	137.341				0.068927	59.4808	0.603692	314.38				0.0521493	44.6392	0.257043	109.481		0.0643506	75.849	0.165315	77.8074	0.189582	71.8794
			0.257374	120.693						0.128104	110.764	0.0630443	29.2868				0.161733	139.568	0.179771	93.6181				0.110734	94.787	0.336907	143.497		0.26798	315.864	0.223457	105.173	0.313023	118.682
			0.0913253	42.8263						0.107287	92.7651	0.0204634	9.50614				0.0795831	68.6766	0.624511	325.222				0.148655	127.247	0.272341	115.997		0.0169344	19.9603	0.290289	136.628	0.244273	92.6154
			0.0174023	8.16067						0.0918789	79.4426	0.232861	108.174				0.282706	243.962	0.166744	86.8341				0.0693759	59.385	0.31665	134.87		0.0340456	40.129	0.25411	119.6	0.548834	208.089
			0.0508377	23.8399						0.0456615	39.481	0.0977354	45.4024				0.106437	91.8503	0.283539	147.657				0.0592897	50.7513	0.303181	129.133		0.0717975	84.6265	0.244711	115.176	0.22709	86.1005
			0.160407	75.2216						0.12717	109.957	0.0349509	16.2362				0.0937176	80.874	0.416707	217.006				0.112262	96.095	0.110864	47.2199		0.00659586	7.77443	0.162752	76.6011	0.258723	98.094
			0.0781608	36.6529						0.0938116	81.1137	0.282337	131.158				0.124405	107.356	0.311287	162.107				0.111567	95.5001	0.316686	134.885		0.0770596	90.8289	0.371328	174.77	0.389323	147.611
			0.213246							0.158161	136.753	0.263743	122.52				0.0655009	56.5243	0.245739	127.972				0.100363	85.9096	0.138772	59.1066		0.00374974	4.41976	0.180416	84.9148	0.0775265	29.3939
			0.161079	127.821						0.102511	88.6355	0.131406	61.0438				0.103056	88.9326	0.235981	122.89				0.164386	140.713	0.357456	152.25		0.0159688	18.8222	0.24984	117.59	0.111014	42.0906
			0.329154	261.194						0.109253	94.465	0.106957	49.6862				0.170229	146.9	0.268888	140.027				0.135553	116.032	0.224721	95.7145		0.0286698	33.7926	0.154389	72.6649	0.0620856	23.5396
			0.229979	182.495						0.141476	122.326	0.038824	18.0354				0.0995127	85.8749	0.402295	209.5				0.100713	86.2092	0.271229	115.524		0.0282994	33.356	0.305613	143.84	0.0665623	25.2369
			0.0577609	45.8351						0.111938	96.7865	0.233621	108.527				0.101123	87.2645	0.0275062	14.3242				0.117635	100.694	0.137996	58.7761		0.83206	980.736	0.0867994	40.8531	0.152976	58.0004
			0.0792033	62.8503						0.128822	111.385	0.123063	57.1681				0.145773	125.795	0.112203	58.4311				0.0869739	74.4487	0.351914	149.889		0.0617847	72.8246	0.177043	83.3273	0.12118	45.945
			0.226109	179.425						0.160785	139.022	0.215587	100.15				0.12289	106.048	0.337127	175.563				0.0883501	75.6267	0.564616	240.485		0.0457635	53.9407	0.16703	78.6146	0.166464	63.1143
			0.203844	161.757						0.115234	99.6364	0.0803027	37.3041				0.0987738	85.2373	0.301513	157.017				0.239919	205.368	0.362996	154.609		0.0225733	26.6068	0.192445	90.5764	0.199502	75.6406
			0.099481	78.9413						0.179723	155.396	0.437443	203.211				0.133172	114.921	0.153369	79.8689				0.1293	110.679	0.225259	95.9437		0.0117536	13.8538	0.0943978	44.4294	0.0695918	26.3855
			0.0509225	40.4086						0.21142	182.803	0.55727	258.876				0.0711324	61.384	0.119027	61.9848				0.149009	127.55	0.0376412	16.0324		0.0738898	87.0927	0.101275	47.6662	0.0276535	10.4847
			0.308318	244.66						0.0790189	68.3232	0.138536	64.356				0.105955	91.4343	0.215457	112.202				0.0621175	53.1719	0.308005	131.187		0.0848404		0.0874712	41.1693	0.301619	114.358
			0.177282	140.679						0.0708427	61.2537	0.0288283	13.392				0.0602604	52.002	0.11494	59.8565				0.0938653	80.3476	0.214345	91.2951				0.184962	87.0545	0.145682	55.2349
			0.127069	100.833						0.124259	107.44	0.233913	108.663				0.134467	116.039	0.0914365	47.6167				0.0888799	76.0802	0.0428596	18.255				0.0587723	27.6618	0.349252	132.418
			0.115159	91.3823						0.151615	131.093	0.0125936	5.85028				0.14757	127.346	0.0887991	46.2433				0.171606	146.893	0.127506	54.3081				0.31044	146.112	0.0950369	36.0329
			0.0975015	77.3705						0.163302	141.198	0.418198	194.271				0.116036	100.134	0.0781008	40.672				0.134137	114.82	0.316868	134.962				0.0809662	38.1077	0.12915	48.9668
			0.0881081	69.9165						0.110332	95.3979	0.439778	204.296				0.124637	107.556	0.090552	47.1561				0.114027	97.6058	0.384963	163.966				0.124693	58.6882	0.103006	39.0544
			0.127305	101.02						0.198714	171.817	0.059391	27.5897				0.149537	129.044	0.0655698	34.1463				0.0763112	65.3215	0.267163	113.792				0.0474623	22.3387	0.147396	55.8847
			0.0610819	48.4704						0.0877455	75.8686	0.0886529	41.1831				0.147942	127.667	0.0369559	19.2453				0.103528	88.6188	0.041785	17.7973				0.182733	86.0054	0.138042	52.3382
			0.133781	106.159						0.134353	116.168	0.141943	65.9387				0.071446	61.6546	0.204281	106.382				0.11855	101.477	0.0256742	10.9353				0.204487	96.2441	0.0776363	29.4356
			0.0758948	60.2249						0.0898238	77.6656	0.0699195	32.4807				0.176787	152.559	0.126922	66.0963				0.11066	94.7237	0.155824	66.3695				0.1818	85.5662	0.0806366	30.5731
			0.0834261	66.2012						0.229829	198.72	0.234177	108.785				0.126292	108.984	0.127732	66.5181				0.0573618	49.101	0.233847	99.6015				0.250881	118.08	0.41665	157.972
			0.0649325	51.526						0.133872	115.752	0.168067	78.0745				0.0797855	68.8512	0.0992773	51.6999				0.025038	21.4322	0.0487449	20.7617				0.235228	110.713	0.0465792	17.6604
			0.090015	71.4297						0.14365	124.206	0.336515	156.326				0.134696	116.236	0.0417033	21.7175				0.0904845	77.4537	0.110565	47.0925				0.166612	78.4178	0.392957	148.988
			0.187772	149.003						0.208901	180.625	0.0207719	9.64946				0.13054	112.65	0.0604482	31.4792				0.09035	77.3386	0.419134	178.52				0.221831	104.407	0.486403	184.418
			0.0474785	37.6757						0.0939703	81.2509	0.250931	116.568				0.151382	130.636	0.206017	107.286				0.11476	98.2332	0.0654412	27.8731				0.132484	62.3551	0.21772	82.5479
			0.100373	79.6491						0.0802336	69.3735	0.428146	198.893				0.127008	109.602	0.145969	76.0152				0.0844838	72.3172	0.0351652	14.9778				0.151425	71.2699	0.525955	199.414
			0.0397304	31.5273						0.0698708	60.4134	0.347056	161.223				0.218558	188.606	0.049989	26.0324				0.110394	94.496	0.0329556	14.0367				0.183395	86.3169	0.805324	305.336
			0.151916	120.55						0.0904608	78.2164	0.0114845	5.33505				0.139154	120.084	0.250953	130.687				0.164674	140.959	0.0812869	34.6222				0.28395	133.644	0.360081	136.524
			0.0955678	75.836						0.116838	101.023	0.451522	209.752				0.186231	160.709	0.333027	173.428				0.117073	100.213	0.057707	24.5789				0.38617	181.755	0.160162	60.7249
			0.0889282	70.5673						0.0974623	84.2702	0.0180221	8.37205				0.132086	113.984	0.691978	360.356				0.118483	101.42	0.174435	74.2964				0.272341	128.18	0.451721	171.269
			0.193421	153.486						0.062922	54.4051	0.164501	76.4179				0.123151	106.274	0.471598	245.591				0.106989	91.5814	0.118852	50.6222				0.322251	151.671	0.219626	83.2705
			0.200847	159.378						0.0737117	63.7344	0.0363119	16.8685				0.0803344	69.3249	0.123276	64.1976				0.110498	94.585	0.0374744	15.9613				0.242777	114.266	0.330855	125.443
			0.307175	243.753						0.169515	146.57	0.0506595	23.5336				0.137076	118.29	0.085313	44.4278				0.155838	133.396	0.0755937	32.1973				0.141219	66.4663	0.0158402	6.00576
			0.175003	138.87						0.140126	121.159	0.102273	47.5103				0.0819747	70.7404	0.248478	129.398				0.0912179	78.0815	0.22271	94.858				0.147305	69.3308	0.422437	160.166
			0.265127	210.387						0.115654		0.0145854	6.77556				0.132207	114.089	0.0638965	33.2749				0.0845446	72.3692	0.265035	112.885				0.249159	117.27	0.404952	153.536
			0.147817	117.297						0.0430329	36.2865	0.1974	91.7009				0.0909806	78.5121	0.318793	166.016				0.157284	134.633	0.0315283	13.4287				0.264457	124.47	0.242291	91.8639
			0.12041	95.5491						0.0646432	54.5089	0.25796	119.834				0.138903	119.867	0.0741406	38.6097				0.0841579	72.0382	0.211421	90.0497				0.190863	89.8318	0.0342277	12.9773
			0.226859	180.02						0.0734647	61.9474	0.0787546	36.585				0.106186	91.6337	0.120328	62.6623				0.0856445	73.3107	0.209638	89.2903				0.19741	92.9133	0.459813	174.337
			0.124969	99.1668						0.120574	101.671	0.421913	195.997				0.0814688	70.3038	0.144099	75.0414				0.107552	92.0633	0.149992	63.8855				0.128028	60.2578	0.26375
			0.131249	104.15						0.11934	100.631	0.206799	96.0672				0.262873	226.847	0.240201	125.088				0.240889	206.198	0.278666	118.691				0.253019	119.086	0.320452	89.4936
			0.12401	98.4058						0.138889	117.115	0.362502	168.398				0.0956716	82.5602	0.177784	92.5833				0.125773	107.66	0.395888	168.619				0.243127	114.43	0.522592	145.946
			0.308166	244.539						0.15941	134.419	0.320345	148.814				0.0527112	45.4874	0.125112	65.1537				0.0514245	44.0188	0.400485	170.577				0.27825	130.962	0.290746	81.1975
			0.169715	134.674						0.212909	179.531	0.033542	15.5817				0.108056	93.2474	0.240281	125.129				0.0896409	76.7316	0.0754583	32.1397				0.110747	52.1243	0.545564	152.361
			0.110486	87.6741						0.158396	133.564	0.263964	122.623				0.1174	101.311	0.740161	385.448				0.0805418	68.9429	0.0939703	40.0244				0.154301	72.6235	0.513293	143.349
			0.16664	132.234						0.143877	121.321	0.215265					0.0663871	57.289	0.241649	125.842				0.0676452	57.9035	0.111034	47.2923				0.201412	94.7968	0.31765	88.7111
			0.19187	152.255						0.158703	133.823						0.13933	120.235	0.166485	86.6992				0.116327	99.5746	0.522997	222.758				0.13653	64.2594	0.34357	95.9498
			0.394296	312.886						0.232281	195.866						0.126467	109.135	0.215397	112.171				0.0458062	39.2096	0.484787	206.483				0.251857	118.539	0.662048	184.892
			0.114489	90.8506						0.152571	128.652						0.095748	82.6261	0.235861	122.828				0.281006	240.538	0.280639	119.531				0.200198	94.2255	0.471745	131.746
			0.128679	102.111						0.134761	113.634						0.119728	103.32	0.440993	229.653				0.138197	118.295	0.0865015	36.8432				0.140243	66.007	0.367031	102.502
			0.298332	236.736						0.198868	167.691						0.106756	92.1255	0.272615	141.968				0.128932	110.364	0.205443	87.5035				0.234791	110.507	0.831678	232.265
			0.135109	107.213						0.156765	132.189						0.114753	99.0266	0.174886	91.0741				0.0868134	74.3113	0.341279	145.36				0.239687	112.811	0.316029	88.2584
			0.159792	126.8						0.204251	172.23						0.0639144	55.1552	0.28705	149.485				0.0970422	83.067	0.037481	15.9641				0.237818	111.932	0.314719	87.8925
			0.133155	105.663						0.0805223	67.8986						0.111832	96.5059	0.340947	177.553				0.0800324	68.5068	0.131633	56.0659				0.0725115	34.1284	0.567427	158.467
			0.190716	151.339						0.227952	192.215						0.150588	129.951	0.109451	56.998				0.140733	120.466	0.326853	139.215				0.243971	114.828	0.232449	64.9167
			0.106462	84.4809						0.0816062	68.8126						0.0906342	78.2132	0.192026					0.0876369	75.0162	0.200818	85.5336				0.178003	83.7791	0.776109	216.746
			0.146978	116.632						0.0563735	47.5357						0.0828795	71.5212						0.108923	93.2368	0.327057	139.302				0.331488	156.019	0.320781	89.5855
			0.133583	106.002						0.072191	60.8734						0.138208	119.267						0.12311	105.381	0.0111108	4.73238				0.169244	79.6566	0.300533	83.9308
			0.188962	149.947						0.0943719	79.577						0.165488	142.809						0.156574	134.026	0.254927	108.58				0.298598	140.539	0.416807	116.403
			0.158842	126.046						0.0968802	81.692						0.0737235	63.62						0.171202	146.547	0.576997	245.758				0.160882	75.7209	0.460607	128.635
			0.119911	95.1531						0.119855	101.065						0.0749199	64.6524						0.109114	93.4003	0.172988	73.6801				0.199117	93.7167	0.406388	113.493
			0.220294	174.81						0.0244657	20.6301						0.0789149	68.0999						0.0313285	26.8168	0.281914	120.075				0.241496	113.663	0.291893	81.5178
			0.0644919	51.1763						0.0624414	52.6523						0.0684926	59.106						0.130288	111.525	0.285139	121.448				0.275887	129.849	0.365555	102.09
			0.170476	135.278						0.0604	50.9309						0.10833	93.4838						0.187994	160.921	0.135714	57.8041				0.265999	125.195	0.382124	106.717
			0.156654	124.31						0.0862735	72.7482						0.0778133	67.1493						0.0944124	80.8159	0.257968	109.875				0.212948	100.226	0.376276	105.084
			0.123482	97.9868						0.104203	87.8668						0.110107	95.0173						0.13342	114.206	0.258346	110.036				0.290436	136.697	0.45474	126.997
			0.164848	130.812						0.0643691	54.2778						0.0981978	84.7402						0.121755	104.221	0.202245	86.1414				0.223019	104.966	0.339948	94.9383
			0.0680487	53.9988						0.0538033	45.3684						0.150506	129.88						0.0795026	68.0533	0.303874	129.428				0.16102	75.7859	0.765045	213.656
			0.194221	154.12						0.0757871	63.9057						0.18195	157.015						0.0842417	72.1099	0.74404	316.906				0.347379	163.498	0.407848	113.901
			0.138786	110.131						0.0885465	74.6648						0.16193	139.738						0.129304	110.683	0.314542	133.972				0.314506	148.026	0.36822	102.834
			0.127516	101.188						0.0890963	75.1284						0.0920904	79.4698						0.0816733	69.9114	0.269195	114.657				0.18643	87.7454	0.298925	83.4817
			0.146567	116.305						0.119348	100.637						0.136693	117.96						0.124679	106.724	0.546848	232.917				0.147446	69.3971	0.347111	96.9387
			0.0371736	29.4984						0.062204	52.4521						0.0754971	65.1505						0.159446	136.484	0.290257	123.628				0.397906	187.279	0.619245	172.938
			0.106028	84.1365						0.162241	136.806						0.0778699	67.1982						0.142148	121.677	0.232088	98.8523				0.235795	110.98	0.460522	128.611
			0.0457505	36.3044						0.10853	91.5154						0.0839529	72.4475						0.129707	111.028	0.258663	110.171				0.121117	57.0051	0.36774	102.7
			0.121484	96.4013						0.0499003	42.0773						0.130103	112.273						0.105543	90.3436	0.381018	162.286				0.275595	129.712	0.234154	65.3929
			0.104332	82.7907						0.0364292	30.7181						0.126457	109.127						0.0586625	50.2144	0.234378	99.8277				0.293958	138.355	0.35059	97.9103
			0.0282619	22.4267						0.0512058	43.1781						0.206186	177.929						0.118173	101.155	0.0184812	7.87163				0.238563	112.282	0.407272	113.74
			0.0657614	52.1837						0.0967991	81.6236						0.115881							0.072302	61.8897	0.251794	107.246				0.205547	96.743	0.189048	52.796
			0.081483	64.6593						0.0771376	65.0445						0.0989241	76.5595						0.0988678	84.6297	0.258889	110.268				0.206173	97.0377	0.581439	162.38
			0.0787626	62.5006						0.0638714	53.8581						0.129953	100.573						0.119866	102.604	0.130846	55.7307				0.184664	86.9142	0.0648948	18.1234
			0.0358369	28.4377						0.0653834	55.1331						0.105231	81.4406						0.0817482	69.9755	0.360358	153.486				0.207592	97.7055	0.0382434	10.6804
			0.0908735	72.111						0.171271	144.42						0.255735	197.919						0.137131	117.383	0.111152	47.3425				0.190857	89.829	0.248907	69.513
			0.0474376	37.6432						0.216039	182.17						0.116612	90.2486						0.040159	34.3756	0.647517	275.794				0.189787	89.3254	0.0890562	24.871
			0.04097	32.511						0.0784767	66.1737						0.126732	98.0807						0.126037	107.886	0.329093	140.169				0.203311	95.6906	0.0702853	19.6288
			0.0419601	33.2966						0.264113	222.707						0.0870872	67.3987						0.0721248	61.738	0.178701	76.1134				0.315978	148.719	0.0375282	10.4806
			0.0373764	29.6593						0.203622	171.7						0.116081	89.8376						0.0588164	50.3462	0.0488815	20.8199				0.158743	74.7142	0.0869315	24.2776
			0.0550643	43.6952						0.0640257	53.9882						0.123395	95.4981						0.130102	111.366	0.150411	64.064				0.226433	106.573	0.40799	113.941
			0.0453228	35.9651						0.163751	138.079						0.151511	117.258						0.114018	97.5981	0.667227	284.189				0.131385	61.8378	0.824437	230.243
			0.0634847	50.3771						0.242405	204.402						0.131064	101.433						0.102327	87.5907	0.414241	176.436				0.241357	113.597	0.606436	169.361
			0.130272	103.375						0.0354144	29.8624						0.0590201	45.6769						0.141813	121.39	0.263313	112.152				0.228702	107.641	0.123091	34.376
			0.0695647	55.2018						0.067837	57.202						0.134222	103.877						0.099004	84.7463	0.243426	103.681				0.606252	285.339	0.260532	72.7596
			0.0578353	45.8941						0.196297	165.523						0.179505	138.923						0.21208	181.538	0.391083	166.572				0.203003	95.5457	0.294948	82.371
			0.170651	135.417						0.233549	196.935						0.113818	88.0862						0.122695	105.026	0.24626	104.889				0.212467	100	0.469997	131.257
			0.132438	105.094						0.115614	97.4889						0.219939	170.216						0.1433	122.663	0.614186	261.598				0.23508	110.643	0.29265	81.7293
			0.111579	88.5414						0.0952825	80.3448						0.0633821	49.0528						0.235081	201.227	0.219969	93.6905				0.198091	93.2338	0.740816	206.89
			0.013159	10.4421						0.164497	138.708						0.101364	78.4478						0.299209	256.119	0.245811	104.697				0.212467		0.559515	156.257
			0.167694	133.07						0.117561	99.1306						0.112924	87.3944						0.138339	118.417	0.201342	85.7568				0.304827	99.6678	0.299902	83.7545
			0.150915	119.756						0.135059	113.885						0.153477	118.779						0.106113	90.8315	0.0866058	36.8877				0.21168	69.212	0.318513	88.9521
			0.151977	120.598						0.313741	264.555						0.138485	107.177						0.168819	144.507	0.235187	100.172				0.199672	65.2858	0.241302	67.3891
			0.116448	92.4051						0.179848	151.653						0.147681	114.294						0.158551	135.718	0.239409	101.971				0.310765	101.609	0.437685	122.234
			0.091006	72.2161						0.114991	96.9635						0.0732832	56.7155						0.104933	89.8214	0.144463	61.5306				0.240916	78.7711	0.401231	112.053
			0.189662	150.503						0.160009	134.924						0.13048	100.981						0.240122	205.542	0.234783					0.275262	90.0011	0.172238	48.1014
			0.123438	97.9519						0.222242	187.4						0.0805233	62.3187						0.180817	154.777						0.112717	36.8545	0.550185	153.652
			0.290285	230.35						0.144322	121.696						0.110972	85.8837						0.0643376	55.0722						0.177051	57.8895	0.594237	165.954
			0.172191	136.639						0.190548	160.675						0.137418	106.351						0.116575	99.7869						0.233042	76.1966	0.324639	90.6629
			0.102999	81.7329						0.305893	257.937						0.172541	133.533						0.0552636	47.305						0.383081	125.254	0.111267	31.0739
			0.16014	127.076						0.131304	110.719						0.137068	106.08						0.117781	100.819						0.202085	66.0748	0.368213	102.832
			0.126019							0.15712	132.488						0.124947	96.6992						0.104084	89.0947						0.165999	54.2759	0.27724	77.4257
										0.145309	122.529						0.140354	108.623						0.106811	91.429						0.105122	34.3712	0.248687	69.4516
										0.106208	89.5575						0.128436	99.3994						0.142127	121.659						0.221459	72.4094	0.518864	144.905
										0.0666728	56.2203						0.101436	78.5035						0.111561	95.4949						0.186978	61.1353	0.415618	116.071
										0.0855167	72.11						0.152306	117.873						0.0635332	54.3837						0.224588	73.4324	0.305795	85.4003
										0.165112	139.227						0.158654	122.786						0.149702	128.143						0.230878	75.4891	0.0417374	11.6561
										0.118592	100						0.221679	171.562						0.0578904	49.5535						0.195219	63.8298	0.500378	139.742
										0.104037	87.7268						0.154081	119.247						0.0913529	78.197						0.178733	58.4395	0.337348	94.2122
										0.330285	278.505						0.158493	122.661						0.102536	87.7696						0.132202	43.2254	0.437736	122.248
										0.114939	96.9197						0.139994	108.344						0.116824							0.381742	124.816	0.929666	259.631
										0.106875	90.1199						0.142221	110.068						0.227333	136.436						0.333921	109.181	0.675798	188.732
										0.217864	183.709						0.078016	60.3783						0.138753	83.2736						0.222321	72.6912	0.257474	71.9055
										0.165122	139.235						0.282758	218.833						0.227659	136.631						0.310068	101.381	0.319905	89.3408
										0.0717383	60.4917						0.0749388	57.9968						0.140593	84.3779						0.242658	79.3407	0.289008	80.7121
										0.0652943	55.0579						0.145734	112.787						0.178908	107.373						0.289972	94.8107	0.358073
										0.180068	151.838						0.11472	88.7843						0.203422	122.085						0.445009	145.502
										0.180519	152.219						0.071747	55.5266						0.190365	114.249						0.372221	121.703
										0.189306	159.628						0.126931	98.2347						0.201388	120.864						0.269816	88.2204
										0.124839	105.268						0.105918	81.9723						0.18092	108.58						0.365973	119.66
										0.125514	105.837						0.103926	80.4306						0.118098	70.8774						0.282043	92.2182
										0.129128	108.884						0.0893381	69.1407						0.17989	107.962						0.359946	117.69
										0.122833	103.576						0.100213	77.557						0.20577	123.494						0.285652	93.3982
										0.122209	103.05						0.130759	101.197						0.17431	104.613						0.405141	132.467
										0.0694675	58.5769						0.0905053	70.044						0.152452	91.4952						0.0400543	13.0964
										0.22338	188.36						0.125599	97.2038						0.205487	123.325						0.316628	103.526
										0.0680186	57.3551						0.190499	147.431						0.367929	220.815						0.365283	119.435
										0.0816326	68.8348						0.180671	139.825						0.15065	90.4137						0.552456	180.634
										0.139154	117.338						0.0947092	73.2975						0.191746	115.078						0.281526	92.0492
										0.160058	134.965						0.0784609	60.7226						0.201741	121.076						0.351666	114.983
										0.143339	120.867						0.0338734	26.2154						0.232977	139.823						0.0515764	16.8637
										0.0647975	54.639						0.170026	131.587						0.209454	125.705						0.0962076	31.4565
										0.10816	91.2035						0.146013	113.003						0.174217	104.558						0.0656193	21.4552
										0.266087	224.372						0.106162	82.1611						0.172125	103.302						0.357333	116.835
										0.257424	217.067						0.141549	109.548						0.219966	132.014						0.327078	106.943
										0.0731737	61.7021						0.0942478	72.9404						0.133636	80.2026						0.097623	31.9193
										0.12218	103.025						0.134038	103.735						0.121639	73.0025						0.0870614	28.466
										0.135729	114.45						0.243254	188.26						0.150022	90.0368						0.299414	97.8979
										0.0814108	68.6478						0.0645396	49.9486						0.0782889	46.9857						0.0966787	31.6106
										0.0781891	65.9312						0.143706	111.217						0.200905	120.575						0.0860689	28.1415
										0.0824698	69.5408						0.143783	111.277						0.226732	136.075						0.301798	98.6774
										0.179701	151.529						0.133287	103.154						0.184583	110.779						0.33557	109.72
										0.123559	104.188						0.0861288	66.657						0.205494	123.329						0.0684624	22.3848
										0.0481627	40.6121						0.112015	86.6909						0.188645	113.217						0.0601696	19.6734
										0.126928	107.029						0.232079	179.611						0.231976	139.222						0.467311	152.794
										0.0843589	71.1337						0.0885145	68.5033						0.180604	108.391						0.40905	133.745
										0.342272	288.613						0.133946	103.664						0.179215	107.557						0.331532	108.399
										0.101264	85.3886						0.125465	97.1001						0.133556	80.1546						0.36625	119.751
										0.0425289	35.8615						0.10045	77.7405						0.15196	91.1999						0.0618802	20.2327
										0.0971291	81.9019						0.169942	131.522						0.0884388	53.0772						0.343612	112.349
										0.088877	74.9435						0.108775	84.1834						0.156876	94.1503						0.0337647	11.0399
										0.0801396	67.5759						0.122968	95.1676						0.25336	152.056						0.136393	44.5958
										0.0477748	40.285						0.086328	66.8111						0.176976	106.213						0.372624	121.835
										0.101536	85.6179						0.0781306	60.467						0.248095	148.896						0.371679	121.526
										0.135399	114.172						0.118841	91.9737						0.142115	85.2913						0.341009	111.498
										0.0505266	42.6054						0.129709	100.385						0.260364	156.259						0.0842012	27.5309
										0.118592							0.149173	115.448						0.0236761	14.2094						0.407499	133.238
																	0.336795	260.653						0.217347	130.442						0.13566	44.3561
																	0.129205	99.9946						0.178823	107.322						0.415257	135.775
																	0.12611	97.5993						0.101122	60.6891						0.373911	122.256
																	0.15637	121.018						0.118045	70.8456						0.500863	163.765
																	0.136989	106.019						0.215344	129.24						0.363275	118.778
																	0.113004	87.4563						0.0289425	17.3701						0.423512	138.474
																	0.136719	105.81						0.208002	124.834						0.324046	105.952
																	0.170766	132.16						0.117293	70.3942						0.322872	105.568
																	0.262397	203.075						0.162558	97.5604						0.564699	184.637
																	0.162667	125.892						0.147399	88.4626						0.362432	118.503
																	0.13786	106.693						0.17716	106.324						0.0817055	26.7149
																	0.124788	96.5762						0.140611	84.3887						0.114461	37.4248
																	0.114617	88.7046						0.180175	108.133						0.527717	172.545
																	0.100642	77.8891						0.111074	66.6619						0.321324	105.062
																	0.12733	98.5435						0.144131	86.5013						0.288089	94.1951
																	0.132538	102.574						0.144758	86.8776						0.339812	111.107
																	0.0879083	68.0342						0.107764	64.6753						0.293169	95.856
																	0.0956325	74.0121						0.118083	70.8684						0.338294	110.61
																	0.141098	109.199						0.282115	169.313						0.330672	108.118
																	0.185593	143.634						0.261306	156.825						0.377198	123.331
																	0.121034	93.6709						0.164863	98.9437						0.255654	83.5899
																	0.0973622	75.3507						0.18962	113.802						0.414537	135.539
																	0.113011	87.4617						0.00954353	5.72762						0.329921	107.873
																	0.142579	110.345						0.222704	133.657						0.305843	100
																	0.133285	103.152						0.255031	153.059						0.416794	136.277
																	0.120294	93.0982						0.116198	69.7371						0.269271	88.0422
																	0.142439	110.237						0.13493	80.9792						0.274216	89.6591
																	0.164499	127.309						0.141364	84.8406						0.289038	94.5054
																	0.0630282	48.7789						0.310242	186.194						0.300725	98.3266
																	0.178545	138.18						0.148812	89.3106						0.333546	109.058
																	0.0765177	59.2187						0.240248	144.187						0.238714	78.0512
																	0.188348	145.767						0.216424	129.888						0.189778	62.0508
																	0.137279	106.243						0.136831	82.1201						0.248152	81.1371
																	0.155692	120.493						0.108262	64.9742						0.344761	112.725
																	0.21084	163.174						0.113565	68.1569						0.310881	101.647
																	0.117275	90.7617						0.131671	79.0233						0.310795	101.619
																	0.173789	134.499						0.212621	127.606						0.370954	121.289
																	0.0890556	68.9221						0.210818	126.524						0.338714	110.748
																	0.0964421	74.6387						0.203642	122.217						0.296795	97.0416
																	0.152191	117.784						0.187925	112.785						0.241465	78.9506
																	0.108631	84.0719						0.140747	84.4703						0.345859	113.084
																	0.305736	236.616						0.292528	175.563						0.262314	85.7675
																	0.109701	84.9						0.140508	84.3269						0.292708	95.7053
																	0.0990303	76.6417						0.122104	73.2816						0.0564538	18.4584
																	0.242152	187.407						0.199641	119.816						0.0940157	30.7399
																	0.129219	100.005						0.188221	112.962						0.217327	71.0584
																	0.113062	87.5012						0.18431	110.615						0.198031	64.7492
																	0.227231	175.859						0.231033	138.656						0.316813	103.587
																	0.192953	149.331						0.208338	125.036						0.201111	65.7563
																	0.187622	145.205						0.177889	106.761						0.144891	47.3743
																	0.183799	142.246						0.243818	146.329						0.0382623	12.5104
																	0.0958956	74.2157						0.089844	53.9205						0.273316	89.3648
																	0.175694	135.973						0.19038	114.258						0.127827	41.795
																	0.110791	85.7436						0.166623	100						0.402944	131.749
																	0.0991109	76.7041						0.220016	132.044						0.159766	52.2379
																	0.0793091	61.3791						0.174085	104.478						0.0875325	28.6201
																	0.0638695	49.43						0.173061	103.864						0.348896	114.077
																	0.192401	148.903						0.182442	109.494						0.157726	51.5709
																	0.0838339	64.8809						0.101721	61.0486						0.186396	60.945
																	0.13405	103.744						0.146572	87.9662						0.278311	90.998
																	0.177734	137.552						0.0539197	32.3603						0.347923	113.759
																	0.0987541	76.428						0.216438	129.897						0.357947	117.036
																	0.144372	111.733						0.191609	114.996						0.312223	102.086
																	0.129212							0.228442	137.101						0.159157	52.0388
																								0.163306	98.0093						0.318367	104.095
																								0.185764	111.488						0.109459	35.7893
																								0.210515	126.342						0.154319	50.4569
																								0.0456928	27.4229						0.341101	111.528
																								0.192935	115.791						0.153892	50.3173
																								0.0887732	53.2779						0.325995	106.589
																								0.208817	125.323						0.31955	104.482
																								0.168934	101.387						0.331723	108.462
																								0.191314	114.818						0.180059	58.873
																								0.115456	69.2918						0.29807	97.4585
																								0.161011	96.6319						0.29153	95.3201
																								0.200448	120.3						0.333995	109.205
																								0.0649063	38.954						0.313524	102.511
																								0.187624	112.604						0.350045	114.453
																								0.26815	160.932						0.342516	111.991
																								0.186651	112.02						0.372091	121.661
																								0.12662	75.9919						0.312202	102.079
																								0.0633939	38.0463						0.337377	110.311
																								0.153949	92.3936						0.344644	112.687
																								0.0842444	50.5599						0.350482	114.595
																								0.17731	106.414						0.381598	124.769
																								0.208882	125.362						0.342882	112.11
																								0.128401	77.0608						0.374283	122.377
																								0.0751919	45.127						0.38361	125.427
																								0.139803	83.9038						0.353534	115.593
																								0.129476	77.706						0.309509	101.199
																								0.0217892	13.0769						0.588559	192.438
																								0.0975766	58.5613						0.345045	112.818
																								0.0295473	17.733						0.305843
																								0.0730084	43.8165
																								0.074155	44.5047
																								0.169138	101.509
																								0.0520583	31.2432
																								0.0299019	17.9458
																								0.0310334	18.6249
																								0.121677	73.0253
																								0.0243799	14.6318
																								0.0292662	17.5643
																								0.290488	174.338
																								0.0509726	30.5916
																								0.117927	70.7747
																								0.0693029	41.5926
																								0.02147	12.8854
																								0.0200044	12.0058
																								0.0584786	35.0964
																								0.174674	104.832
																								0.219685	131.846
																								0.0903695	54.2359
																								0.157225	94.3597
																								0.0597664	35.8692
																								0.107863	64.7348
																								0.0942475	56.5633
																								0.0655589	39.3456
																								0.166623
Mean	0.156257	144.691	0.185879		0.204086			0.177461		0.164978		0.206824			0.154761		0.170175		0.177382			0.149291		0.216466		0.267459			0.217831		0.285619		0.265421
SD	0.142415	141.31	0.102308		0.105355			0.148656		0.10651		0.107538			0.138447		0.0915378		0.104326			0.148639		0.119949		0.14039			0.211834		0.111666		0.155144
SE	0.00791193	7.89946	0.00471912		0.00595501			0.00827142		0.00464847		0.00533048			0.00810198		0.00377175		0.00510889			0.00803747		0.00473031		0.00651745			0.0109684		0.00449185		0.00705198
N	324	320	470		313			323		525		407			292		589		417			342		643		464			373		618		484
