# Supplementary material for: Sensory transduction is required for normal development and maturation of cochlear inner hair cell synapses
Source: eLife journal article supplement (doi:10.7554/elife.69433), 2021-11-04
Supplement: supp [file elife-69433-supp-v1.zip › elife_poa_e69433_Supplementary_file_1.xlsx]

## Sheet: Supp. Table 1
	Tonotopic Region (kHz)
	8	11.3	16	22.6	32
WT	38.2 ± 1.7	39.5 ± 1.9	48.2 ± 1.3	48.0 ± 1.0	49.2 ± 1.3
Tmc1Δ/Δ;Tmc2Δ/Δ	36.3 ± 2.4	41.8 ± 2.7	51.5 ± 3.3	54.3 ± 4.1	55.3 ± 3.2
p (Wilcoxon rank sum)	0.2251	0.5368	>0.9999	0.881	0.329

## Sheet: Supp. Table 1 Prism Stats
8	Wilcoxon Rank Sum Test
	P value	0.2251
	Exact or approximate P value?	Exact
	P value summary	ns
	Significantly different (P < 0.05)?	No
	One- or two-tailed P value?	Two-tailed
	Sum of ranks in column A,B	37 , 29
	Mann-Whitney U	8
	Difference between medians
	Median of column A	35.88, n=5
	Median of column B	34.63, n=6
	Difference: Actual	-1.25
11.3	Wilcoxon Rank Sum Test
	P value	0.5368
	Exact or approximate P value?	Exact
	P value summary	ns
	Significantly different (P < 0.05)?	No
	One- or two-tailed P value?	Two-tailed
	Sum of ranks in column C,D	26 , 40
	Mann-Whitney U	11
	Difference between medians
	Median of column C	38.13, n=5
	Median of column D	39.85, n=6
	Difference: Actual	1.723
16	Wilcoxon Rank Sum Test
	P value	>0.9999
	Exact or approximate P value?	Exact
	P value summary	ns
	Significantly different (P < 0.05)?	No
	One- or two-tailed P value?	Two-tailed
	Sum of ranks in column E,F	27 , 28
	Mann-Whitney U	12
	Difference between medians
	Median of column E	48.00, n=5
	Median of column F	47.11, n=5
	Difference: Actual	-0.8889
22.6	Wilcoxon Rank Sum Test
	P value	0.881
	Exact or approximate P value?	Exact
	P value summary	ns
	Significantly different (P < 0.05)?	No
	One- or two-tailed P value?	Two-tailed
	Sum of ranks in column G,H	29 , 37
	Mann-Whitney U	14
	Difference between medians
	Median of column G	48.50, n=5
	Median of column H	52.01, n=6
	Difference: Actual	3.514
32	Wilcoxon Rank Sum Test
	P value	0.329
	Exact or approximate P value?	Exact
	P value summary	ns
	Significantly different (P < 0.05)?	No
	One- or two-tailed P value?	Two-tailed
	Sum of ranks in column I,J	24 , 42
	Mann-Whitney U	9
	Difference between medians
	Median of column I	50.63, n=5
	Median of column J	52.94, n=6
	Difference: Actual	2.313
