# Supplementary material for: Sensory transduction is required for normal development and maturation of cochlear inner hair cell synapses
Source: eLife journal article supplement (doi:10.7554/elife.69433), 2021-11-04
Supplement: supp [file elife-69433-supp-v1.zip › elife_poa_e69433_Supplementary_file_2.xlsx]

## Sheet: Supp. Table 2A
Timepoint	Region (kHz)	Group comparison	Mean Difference	(95% CI)	Bonferonni Adjusted p
P7	8	Tmc1Δ/Δ;Tmc2Δ/Δ vs. WT	17.24	(10.5 to 24.0)	< 0.001	***
		Tmc1Δ/Δ vs. WT	2.3	(-6.0 to 10.6)	1.000	ns
		Tmc2Δ/Δ vs. WT	6.65	(-1.7 to 15)	0.178	ns
		Tmc1Δ/Δ;Tmc2Δ/Δ vs. Tmc1Δ/Δ	14.94	(8.2 to 21.7)	< 0.001	***
		Tmc1Δ/Δ;Tmc2Δ/Δ vs. Tmc2Δ/Δ	10.6	(3.8 to 17.4)	0.001	**
		Tmc1Δ/Δ vs. Tmc2Δ/Δ	-4.34	(-12.7 to 4.0)	0.849	ns
	11.3	Tmc1Δ/Δ;Tmc2Δ/Δ vs. WT	17.32	(9.9 to 24.7)	< 0.001	***
		Tmc1Δ/Δ vs. WT	2.15	(-6.9 to 11.2)	1.000	ns
		Tmc2Δ/Δ vs. WT	6.27	(-2.8 to 15.3)	0.336	ns
		Tmc1Δ/Δ;Tmc2Δ/Δ vs. Tmc1Δ/Δ	15.17	(7.8 to 22.6)	< 0.001	***
		Tmc1Δ/Δ;Tmc2Δ/Δ vs. Tmc2Δ/Δ	11.04	(3.7 to 18.4)	0.002	**
		Tmc1Δ/Δ vs. Tmc2Δ/Δ	-4.13	(-13.2 to 4.9)	1.000	ns
	16	Tmc1Δ/Δ;Tmc2Δ/Δ vs. WT	15.13	(7.8 to 22.4)	< 0.001	***
		Tmc1Δ/Δ vs. WT	0.44	(-8.4 to 9.3)	1.000	ns
		Tmc2Δ/Δ vs. WT	3.16	(-5.7 to 12.0)	1.000	ns
		Tmc1Δ/Δ;Tmc2Δ/Δ vs. Tmc1Δ/Δ	14.7	(7.4 to 22.0)	< 0.001	***
		Tmc1Δ/Δ;Tmc2Δ/Δ vs. Tmc2Δ/Δ	11.97	(4.7 to 19.3)	< 0.001	***
		Tmc1Δ/Δ vs. Tmc2Δ/Δ	-2.72	(-11.6 to 6.1)	1.000	ns
	22.6	Tmc1Δ/Δ;Tmc2Δ/Δ vs. WT	15.25	(7.9 to 22.6)	< 0.001	***
		Tmc1Δ/Δ vs. WT	1	(-8.0 to 10.0)	1.000	ns
		Tmc2Δ/Δ vs. WT	1.99	(-7.0 to 11.0)	1.000	ns
		Tmc1Δ/Δ;Tmc2Δ/Δ vs. Tmc1Δ/Δ	14.25	(6.9 to 21.6)	< 0.001	***
		Tmc1Δ/Δ;Tmc2Δ/Δ vs. Tmc2Δ/Δ	13.26	(5.9 to 20.6)	< 0.001	***
		Tmc1Δ/Δ vs. Tmc2Δ/Δ	-0.99	(-10.0 to 8.0)	1.000	ns
	32	Tmc1Δ/Δ;Tmc2Δ/Δ vs. WT	15.14	(8.4 to 21.9)	< 0.001	***
		Tmc1Δ/Δ vs. WT	4.26	(-3.9 to 12.4)	0.838	ns
		Tmc2Δ/Δ vs. WT	3.1	(-5.1 to 11.2)	1.000	ns
		Tmc1Δ/Δ;Tmc2Δ/Δ vs. Tmc1Δ/Δ	10.88	(4.2 to 17.6)	< 0.001	***
		Tmc1Δ/Δ;Tmc2Δ/Δ vs. Tmc2Δ/Δ	12.04	(5.3 to 18.8)	< 0.001	***
		Tmc1Δ/Δ vs. Tmc2Δ/Δ	1.17	(-7.0 to 9.3)	1.000	ns

## Sheet: Supp. Table 2B
Timepoint	Region (kHz)	Group comparison	Mean Difference	(95% CI)	Bonferonni Adjusted p
P14	8	Tmc1Δ/Δ;Tmc2Δ/Δ vs. WT	1.99	(0.0 to 4.0)	0.055	ns
		Tmc1Δ/Δ vs. WT	2.81	(0.5 to 5.1)	0.012	*
		Tmc2Δ/Δ vs. WT	-0.22	(-2.4 to 1.9)	1.000	ns
		Tmc1Δ/Δ;Tmc2Δ/Δ vs. Tmc1Δ/Δ	-0.82	(-3.3 to 1.7)	1.000	ns
		Tmc1Δ/Δ;Tmc2Δ/Δ vs. Tmc2Δ/Δ	2.21	(-0.1 to 4.5)	0.068	ns
		Tmc1Δ/Δ vs. Tmc2Δ/Δ	3.03	(0.5 to 5.6)	0.015	*
	11.3	Tmc1Δ/Δ;Tmc2Δ/Δ vs. WT	0.01	(-1.6 to 1.6)	1.000	ns
		Tmc1Δ/Δ vs. WT	-0.03	(-1.9 to 1.8)	1.000	ns
		Tmc2Δ/Δ vs. WT	0.88	(-0.9 to 2.6)	0.907	ns
		Tmc1Δ/Δ;Tmc2Δ/Δ vs. Tmc1Δ/Δ	0.04	(-2.0 to 2.0)	1.000	ns
		Tmc1Δ/Δ;Tmc2Δ/Δ vs. Tmc2Δ/Δ	-0.87	(-2.7 to 1.0)	1.000	ns
		Tmc1Δ/Δ vs. Tmc2Δ/Δ	-0.91	(-3.0 to 1.2)	1.000	ns
	16	Tmc1Δ/Δ;Tmc2Δ/Δ vs. WT	0.47	(-2.2 to 3.1)	1.000	ns
		Tmc1Δ/Δ vs. WT	-1.14	(-4.2 to 1.9)	1.000	ns
		Tmc2Δ/Δ vs. WT	1.36	(-1.5 to 4.2)	1.000	ns
		Tmc1Δ/Δ;Tmc2Δ/Δ vs. Tmc1Δ/Δ	1.61	(-1.7 to 4.9)	0.986	ns
		Tmc1Δ/Δ;Tmc2Δ/Δ vs. Tmc2Δ/Δ	-0.9	(-4.0 to 2.2)	1.000	ns
		Tmc1Δ/Δ vs. Tmc2Δ/Δ	-2.51	(-5.9 to 0.9)	0.256	ns
	22.6	Tmc1Δ/Δ;Tmc2Δ/Δ vs. WT	-1.68	(-4.5 to 1.2)	0.588	ns
		Tmc1Δ/Δ vs. WT	-2.16	(-5.4 to 1.1)	0.394	ns
		Tmc2Δ/Δ vs. WT	0.54	(-2.5 to 3.6)	1.000	ns
		Tmc1Δ/Δ;Tmc2Δ/Δ vs. Tmc1Δ/Δ	0.47	(-3.0 to 4.0)	1.000	ns
		Tmc1Δ/Δ;Tmc2Δ/Δ vs. Tmc2Δ/Δ	-2.22	(-5.5 to 1.0)	0.360	ns
		Tmc1Δ/Δ vs. Tmc2Δ/Δ	-2.69	(-6.3 to 0.9)	0.248	ns
	32	Tmc1Δ/Δ;Tmc2Δ/Δ vs. WT	-5.06	(-7 to -3.2)	< 0.001	***
		Tmc1Δ/Δ vs. WT	-1.9	(-4.0 to 0.2)	0.079	ns
		Tmc2Δ/Δ vs. WT	0.54	(-1.4 to 2.4)	1.000	ns
		Tmc1Δ/Δ;Tmc2Δ/Δ vs. Tmc1Δ/Δ	-3.15	(-5.4 to -0.9)	0.004	**
		Tmc1Δ/Δ;Tmc2Δ/Δ vs. Tmc2Δ/Δ	-5.6	(-7.8 to -3.4)	< 0.001	***
		Tmc1Δ/Δ vs. Tmc2Δ/Δ	-2.44	(-4.7 to -0.2)	0.032	*

## Sheet: Supp. Table 2C
Timepoint	Region (kHz)	Group comparison	Mean Difference	(95% CI)	Bonferonni Adjusted p
P28	8	Tmc1Δ/Δ;Tmc2Δ/Δ vs. WT	-4.46	(-7.1 to -1.8)	< 0.001	***
		Tmc1Δ/Δ vs. WT	-4.1	(-6.9 to -1.3)	0.003	**
		Tmc2Δ/Δ vs. WT	0.35	(-2.4 to 3.1)	1.000	ns
		Tmc1Δ/Δ;Tmc2Δ/Δ vs. Tmc1Δ/Δ	-0.36	(-3.0 to 2.3)	1.000	ns
		Tmc1Δ/Δ;Tmc2Δ/Δ vs. Tmc2Δ/Δ	-4.81	(-7.5 to -2.2)	< 0.001	***
		Tmc1Δ/Δ vs. Tmc2Δ/Δ	-4.45	(-7.2 to -1.7)	0.002	**
	11.3	Tmc1Δ/Δ;Tmc2Δ/Δ vs. WT	-4.12	(-7.0 to -1.3)	0.003	**
		Tmc1Δ/Δ vs. WT	-5.4	(-8.4 to -2.4)	< 0.001	***
		Tmc2Δ/Δ vs. WT	0.53	(-2.5 to 3.5)	1.000	ns
		Tmc1Δ/Δ;Tmc2Δ/Δ vs. Tmc1Δ/Δ	1.28	(-1.6 to 4.1)	1.000	ns
		Tmc1Δ/Δ;Tmc2Δ/Δ vs. Tmc2Δ/Δ	-4.65	(-7.5 to -1.8)	0.001	**
		Tmc1Δ/Δ vs. Tmc2Δ/Δ	-5.93	(-8.9 to -3)	< 0.001	***
	16	Tmc1Δ/Δ;Tmc2Δ/Δ vs. WT	-6.61	(-9.0 to -4.3)	< 0.001	***
		Tmc1Δ/Δ vs. WT	-7.13	(-9.6 to -4.7)	< 0.001	***
		Tmc2Δ/Δ vs. WT	0.67	(-1.8 to 3.1)	1.000	ns
		Tmc1Δ/Δ;Tmc2Δ/Δ vs. Tmc1Δ/Δ	0.51	(-1.8 to 2.9)	1.000	ns
		Tmc1Δ/Δ;Tmc2Δ/Δ vs. Tmc2Δ/Δ	-7.29	(-9.6 to -4.9)	< 0.001	***
		Tmc1Δ/Δ vs. Tmc2Δ/Δ	-7.8	(-10.3 to -5.3)	< 0.001	***
	22.6	Tmc1Δ/Δ;Tmc2Δ/Δ vs. WT	-8.66	(-11.2 to -6.1)	< 0.001	***
		Tmc1Δ/Δ vs. WT	-7.3	(-10.0 to -4.6)	< 0.001	***
		Tmc2Δ/Δ vs. WT	-0.05	(-2.8 to 2.7)	1.000	ns
		Tmc1Δ/Δ;Tmc2Δ/Δ vs. Tmc1Δ/Δ	-1.36	(-3.9 to 1.2)	0.743	ns
		Tmc1Δ/Δ;Tmc2Δ/Δ vs. Tmc2Δ/Δ	-8.61	(-11.2 to -6.1)	< 0.001	***
		Tmc1Δ/Δ vs. Tmc2Δ/Δ	-7.25	(-10.0 to -4.6)	< 0.001	***
	32	Tmc1Δ/Δ;Tmc2Δ/Δ vs. WT	-10.25	(-12.5 to -8)	< 0.001	***
		Tmc1Δ/Δ vs. WT	-7.71	(-10.0 to -5.4)	< 0.001	***
		Tmc2Δ/Δ vs. WT	0.98	(-1.4 to 3.3)	1.000	ns
		Tmc1Δ/Δ;Tmc2Δ/Δ vs. Tmc1Δ/Δ	-2.55	(-4.8 to -0.3)	0.021	*
		Tmc1Δ/Δ;Tmc2Δ/Δ vs. Tmc2Δ/Δ	-11.24	(-13.5 to -9.0)	< 0.001	***
		Tmc1Δ/Δ vs. Tmc2Δ/Δ	-8.69	(-11.0 to -6.4)	< 0.001	***
