# Supplementary material for: Sensory transduction is required for normal development and maturation of cochlear inner hair cell synapses
Source: eLife journal article supplement (doi:10.7554/elife.69433), 2021-11-04
Supplement: supp [file elife-69433-supp-v1.zip › elife_poa_e69433_Supplementary_file_3.xlsx]

## Sheet: Supp. Table 3A
Tmc1 and Tmc2 deletion on synapse counts (mean ± SD)
		Genotype
Timepoint	Tonotopic Region (kHz)	WT	Tmc1Δ/Δ;Tmc2Δ/Δ	Tmc1Δ/Δ	Tmc2Δ/Δ
P7
	8	37.7 ± 1.7	54.9 ± 4.9	40.0 ± 1.2	44.3 ± 4.0
	11.3	38.0 ± 2.7	55.3 ± 5.2	40.2 ± 3.6	44.3 ± 3.1
	16	40.1 ± 1.0	55.2 ± 5.5	40.5 ± 2.5	43.3 ± 2.3
	22.6	38.3 ± 3.1	53.6 ± 5.5	39.3 ± 0.5	40.3 ± 2.5
	32	34.2 ± 3.0	49.3 ± 4.9	38.4 ± 0.7	37.3 ± 2.5
P14
	8	16.1 ± 1.4	18.0 ± 1.3	18.9 ± 1.5	15.8 ± 0.7
	11.3	17.2 ± 1.2	17.2 ± 1.2	17.2 ± 0.9	18.1 ± 0.5
	16	17.4 ± 1.7	17.9 ± 2.5	16.2 ± 0.7	18.8 ± 0.8
	22.6	18.0 ± 1.4	16.3 ± 2.9	15.8 ± 0.9	18.5 ± 1.3
	32	18.6 ± 1.3	13.5 ± 1.4	16.7 ± 0.8	19.1 ± 0.8
P28
	8	15.8 ± 0.6	11.3 ± 1.7	11.7 ± 1.5	16.1 ± 0.7
	11.3	16.7 ± 1.4	12.6 ± 1.3	11.3 ± 0.9	17.2 ± 1.6
	16	18.6 ± 1.1	12.0 ± 1.2	11.5 ± 0.9	19.3 ± 1.2
	22.6	18.7 ± 1.0	10.1 ± 1.1	11.4 ± 1.0	18.7 ± 1.7
	32	18.5 ± 1.4	8.2 ± 0.8	10.8 ± 1.1	19.5 ± 1.0
Figure 3A-C: Three-way ANOVA
Source	DF	Sum of Square	Mean Square	F value	p-value
Frequency	4	156.7	39.2	5.07	<0.001
Genotype	3	826.9	275.6	35.69	<0.001
Time	2	47609.2	23804.6	3082.05	<0.001
Genotype*Frequency	12	194.3	16.2	2.1	0.02
Time*Frequency	8	190.2	23.8	3.08	0.003
Genotype*Time	6	5218.5	869.8	112.61	<0.001
Genotype*Time*Freq	24	148.8	6.2	0.8	0.73
Error	262	2023.6	7.7
Figure 3A-C: Two-way ANOVA for each frequency level
Source	DF	Sum of Square	Mean Square	F value	p-value
8 kHz
Genotype	3	261.359	87.1196	12.25	<0.001
Time	2	10583.5	5291.76	743.84	<0.001
Genotype*Time	6	939.581	156.597	22.01	<0.001
Error	53	377.049	7.11412
11.3 kHz
Genotype	3	291.028	97.0094	12.01	<0.001
Time	2	10377.7	5188.86	642.14	<0.001
Genotype*Time	6	945.739	157.623	19.51	<0.001
Error	53	428.271	8.08058
16 kHz
Genotype	3	254.914	84.9713	10.54	<0.001
Time	2	10188.6	5094.31	631.68	<0.001
Genotype*Time	6	934.293	155.715	19.31	<0.001
Error	52	419.367	8.06474
22.6 kH
Genotype	3	156.171	52.057	5.9	0.002
Time	2	9276.86	4638.43	525.37	<0.001
Genotype*Time	6	1190.93	198.488	22.48	<0.001
Error	53	467.927	8.82882
32 kH
Genotype	3	68.5673	22.8558	3.52	0.021
Time	2	7399.25	3699.63	570.08	<0.001
Genotype*Time	6	1347.92	224.654	34.62	<0.001
Error	51	330.973	6.48966

## Sheet: Supp. Table 3B
Tmie deletion on synapse counts (mean ± SD)
		Genotype
Timepoint	Tonotopic Region (kHz)	WT	Tmc1Δ/Δ;Tmc2Δ/Δ	Tmie
P7
	8	37.7 ± 1.7	54.9 ± 4.9	51.0 ± 2.4
	11.3	38.0 ± 2.7	55.3 ± 5.2	52.5 ± 2.9
	16	40.1 ± 1.0	55.2 ± 5.5	51.1 ± 3.1
	22.6	38.3 ± 3.1	53.6 ± 5.5	54.8 ± 4.1
	32	34.2 ± 3.0	49.3 ± 4.9	48.0 ± 4.1
P28
	8	15.8 ± 0.6	11.3 ± 1.7	13.9 ± 1.5
	11.3	16.7 ± 1.4	12.6 ± 1.3	14.5 ± 1.2
	16	18.6 ± 1.1	12.0 ± 1.2	14.0 ± 2.5
	22.6	18.7 ± 1.0	10.1 ± 1.1	11.9 ± 0.6
	32	18.5 ± 1.4	8.2 ± 0.8	10.5 ± 2.1
Figure 4A-B: Three-way ANOVA
Source	DF	Sum of Square	Mean Square	F value	p-value
Frequency	4	282.627	70.6568	5.56	<0.001
Group	2	635.961	317.981	25.03	<0.001
Time	1	44563	44563	3508.1	<0.001
Group*Frequency	8	88.216	11.027	0.87	0.55
Time*Frequency	4	63.628	15.907	1.25	0.29
Group*Time	2	3461.24	1730.62	136.24	<0.001
Group*Time*Frequency	8	72.6682	9.08352	0.72	0.68
Error	148	1880.03	12.7029
Figure 4A-B: Two-way ANOVA for each frequency level
Source	DF	Sum of Square	Mean Square	F value	p-value
8 kHz
Genotype	2	228.981	114.49	10.83	<0.001
Time	1	9165.22	9165.22	867.29	<0.001
Genotype*Time	2	604.884	302.442	28.62	<0.001
Error	30	317.03	10.5677
11.3 kHz
Genotype	2	249.705	124.853	10.16	<0.001
Time	1	9062.9	9062.9	737.86	<0.001
Genotype*Time	2	602.851	301.426	24.54	<0.001
Error	30	368.482	12.2827
16 kHz
Genotype	2	93.8234	46.9117	3.53	0.04
Time	1	8966.19	8966.19	674.09	<0.001
Genotype*Time	2	604.479	302.24	22.72	<0.001
Error	29	385.736	13.3012
22.6 kH
Genotype	2	108.203	54.1017	3.69	0.04
Time	1	9760.1	9760.1	665.92	<0.001
Genotype*Time	2	846.229	423.114	28.87	<0.001
Error	30	439.697	14.6566
32 kH
Genotype	2	43.8393	21.9197	1.72	0.2
Time	1	7680.32	7680.32	603.47	<0.001
Genotype*Time	2	874.638	437.319	34.36	<0.001
Error	29	369.084	12.727
Tmie deletion on synapse counts (mean ± SD)
		Genotype
Timepoint	Tonotopic Region (kHz)	WT	Tmc1Δ/Δ	Bth
P28
	8	15.8 ± 0.6	11.7 ± 1.5	15.1 ± 1.0
	11.3	16.7 ± 1.4	11.3 ± 0.9	15.5 ± 1.0
	16	18.6 ± 1.1	11.5 ± 0.9	15.9 ± 1.5
	22.6	18.7 ± 1.0	11.4 ± 1.0	16.8 ± 1.8
	32	18.5 ± 1.4	10.8 ± 1.1	12.4 ± 2.1
Figure 4C: Two-way ANOVA
Source	DF	Sum of Square	Mean Square	F value	p-value
Genotype	2	406.861	203.431	125.2	<0.001
Frequency	4	29.047	7.26174	4.47	0.004
Genotype*Frequency	8	47.9519	5.99398	3.69	0.002
Error	50	81.244	1.62488

## Sheet: Supp. Table 3C
Tmc1 injection on synapse counts (mean ± SD)
		Genotype
Timepoint	Tonotopic Region (kHz)	WT	Tmc1Δ/Δ	Tmc1Δ/Δ injected
P28
	8	15.8 ± 0.6	11.7 ± 1.5	13.0 ± 1.6
	11.3	16.7 ± 1.4	11.3 ± 0.9	14.4 ± 1.7
	16	18.6 ± 1.1	11.5 ± 0.9	15.7 ± 1.8
	22.6	18.7 ± 1.0	11.4 ± 1.0	16.0 ± 2.7
	32	18.5 ± 1.4	10.8 ± 1.1	15.1 ± 2.7
Figure 6A: Two-way ANOVA
Source	DF	Sum of Square	Mean Square	F value	p-value
Genotype	2	403.413	201.707	59.71	<0.001
Frequency	4	38.4701	9.61753	2.85	0.029
Genotype*Frequency	8	25.3404	3.16755	0.94	0.49
Error	82	276.985	3.37787
