# Supplementary material for: Sensory transduction is required for normal development and maturation of cochlear inner hair cell synapses
Source: eLife journal article supplement (doi:10.7554/elife.69433), 2021-11-04
Supplement: supp [file elife-69433-supp-v1.zip › elife_poa_e69433_Supplementary_file_4.xlsx]

## Sheet: Supp. Table 4A
Timepoint	Region (kHz)	Group comparison	Mean Difference	(95% CI)	Bonferonni Adjusted p
P7	8	Tmc1Δ/Δ;Tmc2Δ/Δ vs. WT	17.2439	(11.1 to 23.4)	< 0.001	***
		Tmie vs. WT	13.358	(6.2 to 20.5)	< 0.001	***
		Tmc1Δ/Δ;Tmc2Δ/Δ vs. Tmie	3.8859	(-1.8 to 9.5)	0.261	ns
	11.3	Tmc1Δ/Δ;Tmc2Δ/Δ vs. WT	17.3152	(10.6 to 24)	< 0.001	***
		Tmie vs. WT	14.4836	(6.7 to 22.3)	< 0.001	***
		Tmc1Δ/Δ;Tmc2Δ/Δ vs. Tmie	2.8315	(-3.3 to 9)	0.726	ns
	16	Tmc1Δ/Δ;Tmc2Δ/Δ vs. WT	15.1325	(8.1 to 22.1)	< 0.001	***
		Tmie vs. WT	11.0497	(3.0 to 19.1)	0.006	**
		Tmc1Δ/Δ;Tmc2Δ/Δ vs. Tmie	4.0828	(-2.4 to 10.5)	0.335	ns
	22.6	Tmc1Δ/Δ;Tmc2Δ/Δ vs. WT	15.2479	(7.8 to 22.7)	<0.001	***
		Tmie vs. WT	16.4144	(7.8 to 25.1)	<0.001	***
		Tmc1Δ/Δ;Tmc2Δ/Δ vs. Tmie	-1.1666	(-8.0 to 5.7)	1	ns
	32	Tmc1Δ/Δ;Tmc2Δ/Δ vs. WT	15.1398	(8.2 to 22.1)	<0.001	***
		Tmie vs. WT	13.8013	(5.9 to 21.7)	<0.001	***
		Tmc1Δ/Δ;Tmc2Δ/Δ vs. Tmie	1.3385	(-5.0 to 7.7)	1	ns

## Sheet: Supp. Table 4B
Timepoint	Region (kHz)	Group comparison	Mean Difference	(95% CI)	Bonferonni Adjusted p
P28	8	Tmc1Δ/Δ;Tmc2Δ/Δ vs. WT	-4.4631	(-7.1 to -1.8)	0.002	**
		Tmie vs. WT	-1.8537	(-4.4 to 0.7)	0.202	ns
		Tmc1Δ/Δ;Tmc2Δ/Δ vs. Tmie	-2.6094	(-5.0 to -0.2)	0.032	*
	11.3	Tmc1Δ/Δ;Tmc2Δ/Δ vs. WT	-4.12	(-6.6 to -1.7)	0.002	**
		Tmie vs. WT	-2.1856	(-4.5 to 0.2)	0.072	ns
		Tmc1Δ/Δ;Tmc2Δ/Δ vs. Tmie	-1.9344	(-4.1 to 0.3)	0.094	ns
	16	Tmc1Δ/Δ;Tmc2Δ/Δ vs. WT	-6.6144	(-10.0 to -3.2)	< 0.001	***
		Tmie vs. WT	-4.5934	(-7.9 to -1.3)	0.006	**
		Tmc1Δ/Δ;Tmc2Δ/Δ vs. Tmie	-2.021	(-5.1 to 1.1)	0.277	ns
	22.6	Tmc1Δ/Δ;Tmc2Δ/Δ vs. WT	-8.6611	(-10.3 to -7.0)	< 0.001	***
		Tmie vs. WT	-6.8325	(-8.5 to -5.2)	< 0.001	***
		Tmc1Δ/Δ;Tmc2Δ/Δ vs. Tmie	-1.8285	(-3.4 to -0.3)	0.018	*
	32	Tmc1Δ/Δ;Tmc2Δ/Δ vs. WT	-10.2522	(-13.2 to -7.3)	< 0.001	***
		Tmie vs. WT	-7.9714	(-10.8 to -5.1)	< 0.001	***
		Tmc1Δ/Δ;Tmc2Δ/Δ vs. Tmie	-2.2808	(-5.0 to 0.4)	0.11	ns

## Sheet: Supp. Table 4C
Timepoint	Region (kHz)	Group comparison	Mean Difference	(95% CI)	Bonferonni Adjusted p
P28	8	Bth vs. WT	-0.687	(-2.7 to 1.3)	1.000	ns
		Tmc1Δ/Δ vs. WT	-4.103	(-6.3 to -1.9)	< 0.001	***
		Bth vs. Tmc1Δ/Δ	3.416	(1.4 to 5.4)	0.002	**
	11.3	Bth vs. WT	-1.2278	(-3.3 to 0.8)	0.369	ns
		Tmc1Δ/Δ vs. WT	-5.4035	(-7.7 to -3.1)	< 0.001	***
		Bth vs. Tmc1Δ/Δ	4.1757	(2.1 to 6.2)	< 0.001	***
	16	Bth vs. WT	-2.6802	(-5.1 to -0.3)	0.027	*
		Tmc1Δ/Δ vs. WT	-7.1278	(-9.6 to -4.6)	< 0.001	***
		Bth vs. Tmc1Δ/Δ	4.4476	(2.1 to 6.8)	0.001	**
	22.6	Bth vs. WT	-1.9061	(-4.6 to 0.8)	0.206	ns
		Tmc1Δ/Δ vs. WT	-7.3033	(-10.0 to -4.6)	< 0.001	***
		Bth vs. Tmc1Δ/Δ	5.3972	(2.7 to 8.1)	< 0.001	***
	32	Bth vs. WT	-6.0764	(-9.4 to -2.7)	0.001	**
		Tmc1Δ/Δ vs. WT	-7.7056	(-11 to -4.4)	< 0.001	***
		Bth vs. Tmc1Δ/Δ	1.6292	(-1.7 to 5.0)	0.555	ns
