# Supplementary material for: Sensory transduction is required for normal development and maturation of cochlear inner hair cell synapses
Source: eLife journal article supplement (doi:10.7554/elife.69433), 2021-11-04
Supplement: supp [file elife-69433-supp-v1.zip › elife_poa_e69433_Supplementary_file_5.xlsx]

## Sheet: Supp. Table 5
	Tonotopic Region (kHz)
	8	11.3	16	22.6	32
WT	30.6 ± 1.8	28.1 ± 5.3	24.4 ± 1.8	32.5 ± 5.3	38.8 ± 8.8
Inj. Tmc1Δ/Δ	61.7 ± 18.3	57.9 ± 18.4	56.3 ± 25.3	83.8 ± 16.0	97.9 ± 8.4
p (Wilcoxon Rank Sum)	<0.0001	<0.0001	0.0004	<0.0001	<0.0001

## Sheet: Supp. Table 5 Prism Stats
	WT Mean	SD	Tmc1 KO inj. Mean	SD
8	30.625	1.76777	61.6667	18.2574
11.3	28.125	5.3033	57.9167	18.3969
16	24.375	1.76777	56.25	25.3274
22.6	32.5	5.34522	83.75	15.9723
32	38.75	8.76275	97.9167	8.38243
8	Wilcoxon Rank Sum
	P value	<0.0001
	Exact or approximate P value?	Exact
	P value summary	***
	Significantly different (P < 0.05)?	Yes
	One- or two-tailed P value?	Two-tailed
	Sum of ranks in column A,B	36.50 , 173.5
	Mann-Whitney U	0.5
11.3	Wilcoxon Rank Sum
	P value	<0.0001
	Exact or approximate P value?	Exact
	P value summary	***
	Significantly different (P < 0.05)?	Yes
	One- or two-tailed P value?	Two-tailed
	Sum of ranks in column C,D	38.50 , 171.5
	Mann-Whitney U	2.5
16	Wilcoxon Rank Sum
	P value	0.0004
	Exact or approximate P value?	Exact
	P value summary	***
	Significantly different (P < 0.05)?	Yes
	One- or two-tailed P value?	Two-tailed
	Sum of ranks in column E,F	43 , 167
	Mann-Whitney U	7
22.6	Wilcoxon Rank Sum
	P value	<0.0001
	Exact or approximate P value?	Exact
	P value summary	***
	Significantly different (P < 0.05)?	Yes
	One- or two-tailed P value?	Two-tailed
	Sum of ranks in column G,H	36 , 174
	Mann-Whitney U	0
32	Wilcoxon Rank Sum
	P value	<0.0001
	Exact or approximate P value?	Exact
	P value summary	***
	Significantly different (P < 0.05)?	Yes
	One- or two-tailed P value?	Two-tailed
	Sum of ranks in column I,J	36 , 174
	Mann-Whitney U	0
