# Supplementary material for: Sensory transduction is required for normal development and maturation of cochlear inner hair cell synapses
Source: eLife journal article supplement (doi:10.7554/elife.69433), 2021-11-04
Supplement: supp [file elife-69433-supp-v1.zip › elife_poa_e69433_Supplementary_file_6.xlsx]

## Sheet: Supp. Table 6A
Timepoint	Region (kHz)	Group comparison	Mean Difference	(95% CI)	Bonferonni Adjusted p
P28	8	Tmc1Δ/Δ inj vs. WT	-2.7387	(-5.0 to -0.5)	0.015	*
		Tmc1Δ/Δ vs. WT	-4.103	(-6.8 to -1.4)	0.003	**
		Tmc1Δ/Δ vs. Tmc1Δ/Δ inj	-1.3644	(-3.6 to 0.9)	0.377	ns
	11.3	Tmc1Δ/Δ inj vs. WT	-2.2704	(-4.6 to 0.1)	0.06	ns
		Tmc1Δ/Δ vs. WT	-5.4035	(-8.3 to -2.5)	< 0.001	***
		Tmc1Δ/Δ vs. Tmc1Δ/Δ inj	-3.1331	(-5.5 to -0.8)	0.008	**
	16	Tmc1Δ/Δ inj vs. WT	-2.9374	(-5.4 to -0.5)	0.017	*
		Tmc1Δ/Δ vs. WT	-7.1278	(-10.1 to -4.2)	< 0.001	***
		Tmc1Δ/Δ vs. Tmc1Δ/Δ inj	-4.1904	(-6.6 to -1.7)	0.001	**
	22.6	Tmc1Δ/Δ inj vs. WT	-2.7813	(-6.2 to 0.6)	0.134	ns
		Tmc1Δ/Δ vs. WT	-7.3033	(-11.4 to -3.2)	< 0.001	***
		Tmc1Δ/Δ vs. Tmc1Δ/Δ inj	-4.5219	(-7.9 to -1.1)	0.008	**
	32	Tmc1Δ/Δ inj vs. WT	-3.3373	(-6.8 to 0.1)	0.062	ns
		Tmc1Δ/Δ vs. WT	-7.7056	(-12.0 to -3.4)	< 0.001	***
		Tmc1Δ/Δ vs. Tmc1Δ/Δ inj	-4.3683	(-7.8 to -0.9)	0.012	*

## Sheet: Supp. Table 6B
		Genotype
Tonotopic Region (kHz)		WT		Tmc1Δ/Δ		Tmc1Δ/Δ inj.
8		1 ± 0.40		1 ± 0.71		1 ± 0.40
		1 ± 0.55		1 ± 1.01		1 ± 0.45
		1 ± 0.38		1 ± 1.92		1 ± 0.52
		1 ± 0.31		1 ± 1.98		1 ± 0.56
11.3		1 ± 0.33		1 ± 1.26		1 ± 0.50
		1 ± 0.34		1 ± 0.95		1 ± 0.42
		1 ± 0.58		1 ± 0.95		1 ± 0.46
		1 ± 0.54		1 ± 0.70		1 ± 0.63
16		1 ± 0.26		1 ± 1.31		1 ± 0.56
		1 ± 0.36		1 ± 0.92		1 ± 0.43
		1 ± 0.42		1 ± 0.94		1 ± 0.56
		1 ± 0.45		1 ± 1.19		1 ± 1.02
22.6		1 ± 0.60		1 ± 1.50		1 ± 0.74
		1 ± 0.27		1 ± 0.96		1 ± 0.52
		1 ± 0.53		1 ± 2.20		1 ± 0.64
		1 ± 0.43		1 ± 1.54		1 ± 0.92
32		1 ± 0.30		1 ± 1.57		1 ± 0.62
		1 ± 0.37		1 ± 1.75		1 ± 0.49
		1 ± 0.46		1 ± 2.95		1 ± 0.84
		1 ± 0.37		1 ± 1.14		1 ± 0.85

## Sheet: Supp. Table 6C
Kruskal-Wallis test			Dunn's multiple comparisons test
P value	Summary		Group comparisons	Mean rank diff.	Summary	P Value
0.0028	**		8kHz Tmc1Δ/Δ vs. WT	7.125	*	0.0154
			8kHz Tmc1Δ/Δ vs. Tmc1Δ/Δ inj.	4.875	ns	0.1663
			8kHz WT vs. Tmc1Δ/Δ inj.	-2.25	ns	>0.9999
0.0099	**		11.3kHz Tmc1Δ/Δ vs. WT	6.5	*	0.0319
			11.3kHz Tmc1Δ/Δ vs. Tmc1Δ/Δ inj.	5.5	ns	0.0921
			11.3kHz WT vs. Tmc1Δ/Δ inj.	-1	ns	>0.9999
0.0031	**		16kHz Tmc1Δ/Δ vs. WT	7.25	*	0.0132
			16kHz Tmc1Δ/Δ vs. Tmc1Δ/Δ inj.	3.25	ns	0.6048
			16kHz WT vs. Tmc1Δ/Δ inj.	-4	ns	0.3481
0.0012	**		22.6kHz Tmc1Δ/Δ vs. WT	7.5	**	0.0098
			22.6kHz Tmc1Δ/Δ vs. Tmc1Δ/Δ inj.	4.5	ns	0.2327
			22.6kHz WT vs. Tmc1Δ/Δ inj.	-3	ns	0.7179
0.0002	***		32kHz Tmc1Δ/Δ vs. WT	8	**	0.005
			32kHz Tmc1Δ/Δ vs. Tmc1Δ/Δ inj.	4	ns	0.3481
			32kHz WT vs. Tmc1Δ/Δ inj.	-4	ns	0.3481
